# Supplementary material for: New ψ-Santonin Derivatives from Crossostephium chinense and Their Anti-Proliferative Activities against Leishmania major and Human Cancer Cells A549
Source: MDPI journal article supplement (doi:10.3390/molecules28248108), 2023-12-15
Supplement: s1 [file s1]

## Supplementary Data

# New $\psi$ -santonin derivatives from *Crossostephium chinense* and their anti- proliferative activities against *Leishmania* *major* and human cancer cells A549

Zhichao Wang <sup>1</sup>, Yoshi Yamano <sup>1</sup>, Susumu Kawakami <sup>2</sup>, Tohru Taniguchi <sup>3</sup>, Gadah Abdulaziz Al-Hamoud <sup>4</sup>, Sachiko Sugimoto <sup>1</sup>, Hideaki Otsuka <sup>2</sup>, Nawal M. Al Musayeib<sup>4</sup>, Musarat Amina<sup>4</sup>and Katsuyoshi Matsunami <sup>1,\*</sup>

<sup>1</sup> Graduate School of Biomedical & Health Sciences, Hiroshima University; 1-2-3 Kasumi, Minami-ku, Hiroshima 734-8551, Japan. [zhichao96425@gmail.com](mailto:zhichao96425@gmail.com) (Z.W.); [ssugimot@hiroshima-u.ac.jp](mailto:ssugimot@hiroshima-u.ac.jp) (S.S.); [yamano@hiroshima-u.ac.jp](mailto:yamano@hiroshima-u.ac.jp) (Y.Y.); [matunami@hiroshima-u.ac.jp](mailto:matunami@hiroshima-u.ac.jp) (K.M.)

<sup>2</sup> Graduate School of Pharmacy, Yasuda Women's University, Hiroshima 734-8551, Japan. [Otsuka-h@yasuda-u.ac.jp](mailto:Otsuka-h@yasuda-u.ac.jp) (H.O.); [kawakami@yasuda-u.ac.jp](mailto:kawakami@yasuda-u.ac.jp) (S.K.)

<sup>3</sup> Frontier Research Center for Advanced Material and Life Science, Faculty of Advanced Life Science, Hokkaido University, North 21 West 11, Sapporo 001-0021, Japan. [ttaniguchi@sci.hokudai.ac.jp](mailto:ttaniguchi@sci.hokudai.ac.jp) (T.T.)

<sup>4</sup> Department of Pharmacognosy, College of Pharmacy, King Saud University, Riyadh 11451, Saudi Arabia; [galhamoud@ksu.edu.sa](mailto:galhamoud@ksu.edu.sa) (G.A.A.-H.); [nalmusayeib@ksu.edu.sa](mailto:nalmusayeib@ksu.edu.sa) (N.M.A.M.); [mamina@ksu.edu.sa](mailto:mamina@ksu.edu.sa) (M.A.)

\* Correspondence: [matunami@hiroshima-u.ac.jp](mailto:matunami@hiroshima-u.ac.jp) (K.M.); Tel.: +81-82-257-5335 (K.M.)

## Contents of Supplementary material

**Figure S1.** Structures of known compounds from *C. chinense*

**Figure S2.**  $^1\text{H}$ -NMR spectrum of **1** in MeOD (500 MHz)

**Figure S3.**  $^{13}\text{C}$ -NMR spectrum of **1** in MeOD (125 MHz)

**Figure S4.**  $^{13}\text{C}$  DEPT135 NMR spectrum of **1** in MeOD (125 MHz)

**Figure S5.** 1H-1H COSY spectrum of **1** in MeOD (500 MHz)

**Figure S6.** HSQC spectrum of **1** in MeOD (500 MHz)

**Figure S7.** HMBC spectrum of **1** in MeOD (500 MHz)

**Figure S8.** PS-NOESY spectrum of **1** in MeOD (500 MHz)

**Figure S9.** HR-ESI-MS spectrum of **1**

**Figure S10.** ESI-MS/MS spectrum of **1**

**Figure S11.**  $^1\text{H}$ -NMR spectrum of **2** in MeOD (500 MHz)

**Figure S12.**  $^{13}\text{C}$ -NMR spectrum of **2** in MeOD (125 MHz)

**Figure S13.**  $^{13}\text{C}$  DEPT135 NMR spectrum of **2** in MeOD (125 MHz)

**Figure S14.** 1H-1H COSY spectrum of **2** in MeOD (500 MHz)

**Figure S15.** HSQC spectrum of **2** in MeOD (500 MHz)

**Figure S16.** HMBC spectrum of **2** in MeOD (500 MHz)

**Figure S17.** PS-NOESY spectrum of **2** in  $\text{CDCl}_3$  (500 MHz)

**Figure S18.** HR-ESI-MS spectrum of **2**

**Figure S19.** ESI-MS/MS spectrum of **2**

**Figure S20.** Experimental CD spectrum of **2** in  $\text{CH}_3\text{CN}$

**Figure S21.**  $^1\text{H}$ -NMR spectrum of **3** in MeOD (500 MHz)

**Figure S22.**  $^{13}\text{C}$ -NMR spectrum of **3** in MeOD (125 MHz)

**Figure S23.**  $^{13}\text{C}$  DEPT135 NMR spectrum of **3** in MeOD (125 MHz)

**Figure S24.** 1H-1H COSY spectrum of **3** in MeOD (500 MHz)

**Figure S25.** HSQC spectrum of **3** in MeOD (500 MHz)

**Figure S26.** HMBC spectrum of **3** in MeOD (500 MHz)

**Figure S27.** HMBC spectrum of **3** in MeOD (700 MHz)

**Figure S28.** PS-NOESY spectrum of **3** in MeOD (500 MHz)

**Figure S29.** HR-ESI-MS spectrum of **3**

**Figure S30.** ESI-MS/MS spectrum of **3**

**Figure S31.**  $^1\text{H}$ -NMR spectrum of **4** in MeOD (500 MHz)

**Figure S32.**  $^{13}\text{C}$ -NMR spectrum of **4** in MeOD (125 MHz)

**Figure S33.**  $^{13}\text{C}$  DEPT135 NMR spectrum of **4** in MeOD (125 MHz)

**Figure S34.** 1H-1H COSY spectrum of **4** in MeOD (500 MHz)

**Figure S35.** HSQC spectrum of **4** in MeOD (500 MHz)

**Figure S36.** HMBC spectrum of **4** in MeOD (500 MHz)

**Figure S37.** PS-NOESY spectrum of **4** in MeOD (500 MHz)

**Figure S38.** HR-ESI-MS spectrum of **4**

**Figure S39.** ESI-MS/MS spectrum of **54**

**Figure S40.**  $^1\text{H}$ -NMR spectrum of **5** in DMSO- $d_6$  (500 MHz)

**Figure S41.**  $^{13}\text{C}$ -NMR spectrum of **5** in DMSO- $d_6$  (125 MHz)

**Figure S42.**  $^{13}\text{C}$  DEPT135 NMR spectrum of **5** in DMSO- $d_6$  (125 MHz)

**Figure S43.**  $^1\text{H}$ - $^1\text{H}$  COSY spectrum of **5** in DMSO- $d_6$  (500 MHz)

**Figure S44.** HSQC spectrum of **5** in DMSO- $d_6$  (500 MHz)

**Figure S45.** HMBC spectrum of **5** in DMSO- $d_6$  (500 MHz)

**Figure S46.** PS-NOESY spectrum of **5** in DMSO- $d_6$  (500 MHz)

**Figure S47.** HR-ESI-MS spectrum of **5**

**Figure S48.** ESI-MS/MS spectrum of **5**

**Figure S49.**  $^1\text{H}$ -NMR spectrum of **6** in DMSO- $d_6$  (500 MHz)

**Figure S50.**  $^{13}\text{C}$ -NMR spectrum of **6** in DMSO- $d_6$  (125 MHz)

**Figure S51.**  $^{13}\text{C}$  DEPT135 NMR spectrum of **6** in DMSO- $d_6$  (125 MHz)

**Figure S52.**  $^1\text{H}$ - $^1\text{H}$  COSY spectrum of **6** in DMSO- $d_6$  (500 MHz)

**Figure S53.** HSQC spectrum of **6** in DMSO- $d_6$  (500 MHz)

**Figure S54.** HMBC spectrum of **6** in DMSO- $d_6$  (500 MHz)

**Figure S55.** PS-NOESY spectrum of **6** in DMSO- $d_6$  (500 MHz)

**Figure S56.** HR-ESI-MS spectrum of **6**

**Figure S57.** ESI-MS/MS spectrum of **6**

**Figure S58.**  $^1\text{H}$ -NMR spectrum of **7** in DMSO- $d_6$  (500 MHz)

**Figure S59.**  $^{13}\text{C}$ -NMR spectrum of **7** in DMSO- $d_6$  (125 MHz)

**Figure S60.**  $^{13}\text{C}$  DEPT135 NMR spectrum of **7** in DMSO- $d_6$  (125 MHz)

**Figure S61.**  $^1\text{H}$ - $^1\text{H}$  COSY spectrum of **7** in DMSO- $d_6$  (500 MHz)

**Figure S62.** HSQC spectrum of **7** in DMSO- $d_6$  (500 MHz)

**Figure S63.** HMBC spectrum of **7** in DMSO- $d_6$  (500 MHz)

**Figure S64.** PS-NOESY spectrum of **7** in DMSO- $d_6$  (500 MHz)

**Figure S65.** HR-ESI-MS spectrum of **7**

**Figure S66.** ESI-MS/MS spectrum of **7**

**Figure S67.** Anti-L. major data of **1-7**

**Figure S68.** Anti-A549 data of **1-7**

**Figure S69.** Vero cell cytotoxicity data of **1-7**

**Figure S1.** Structures of known compounds from *C. chinense*

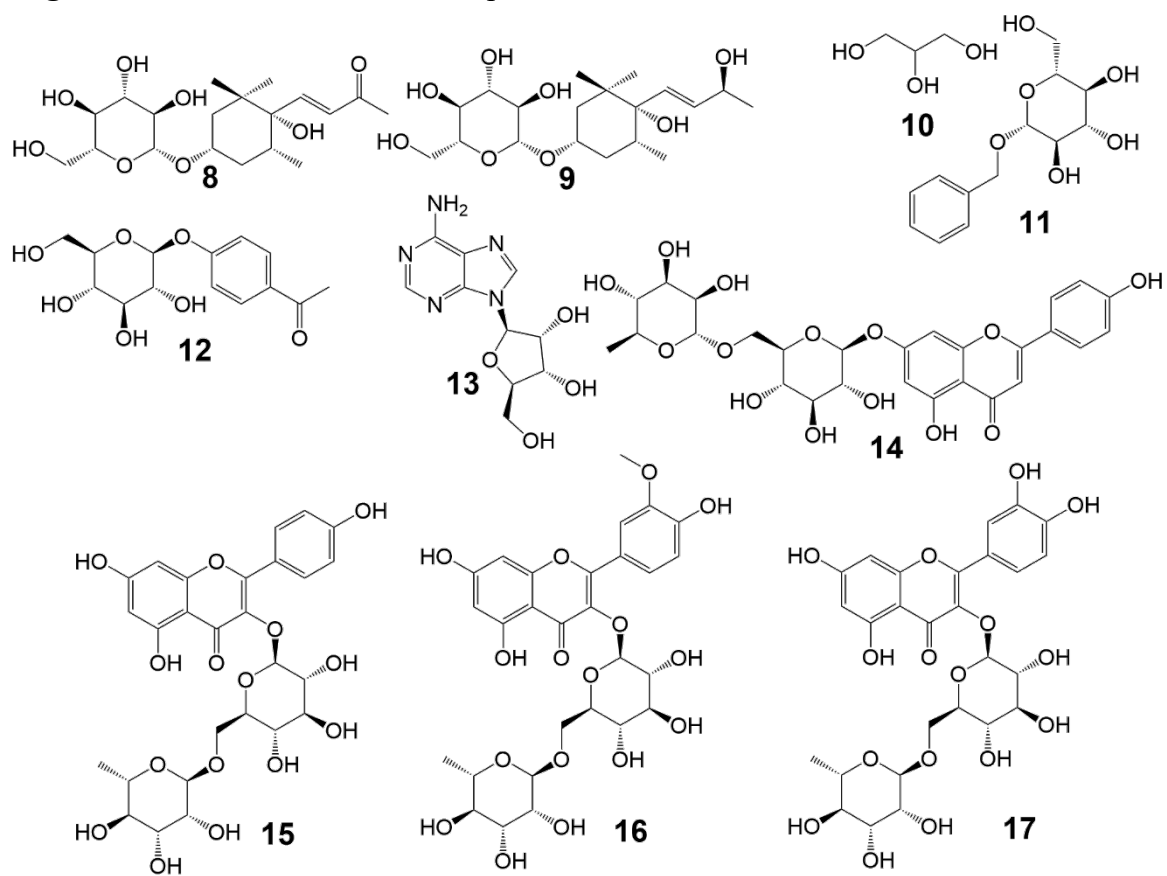



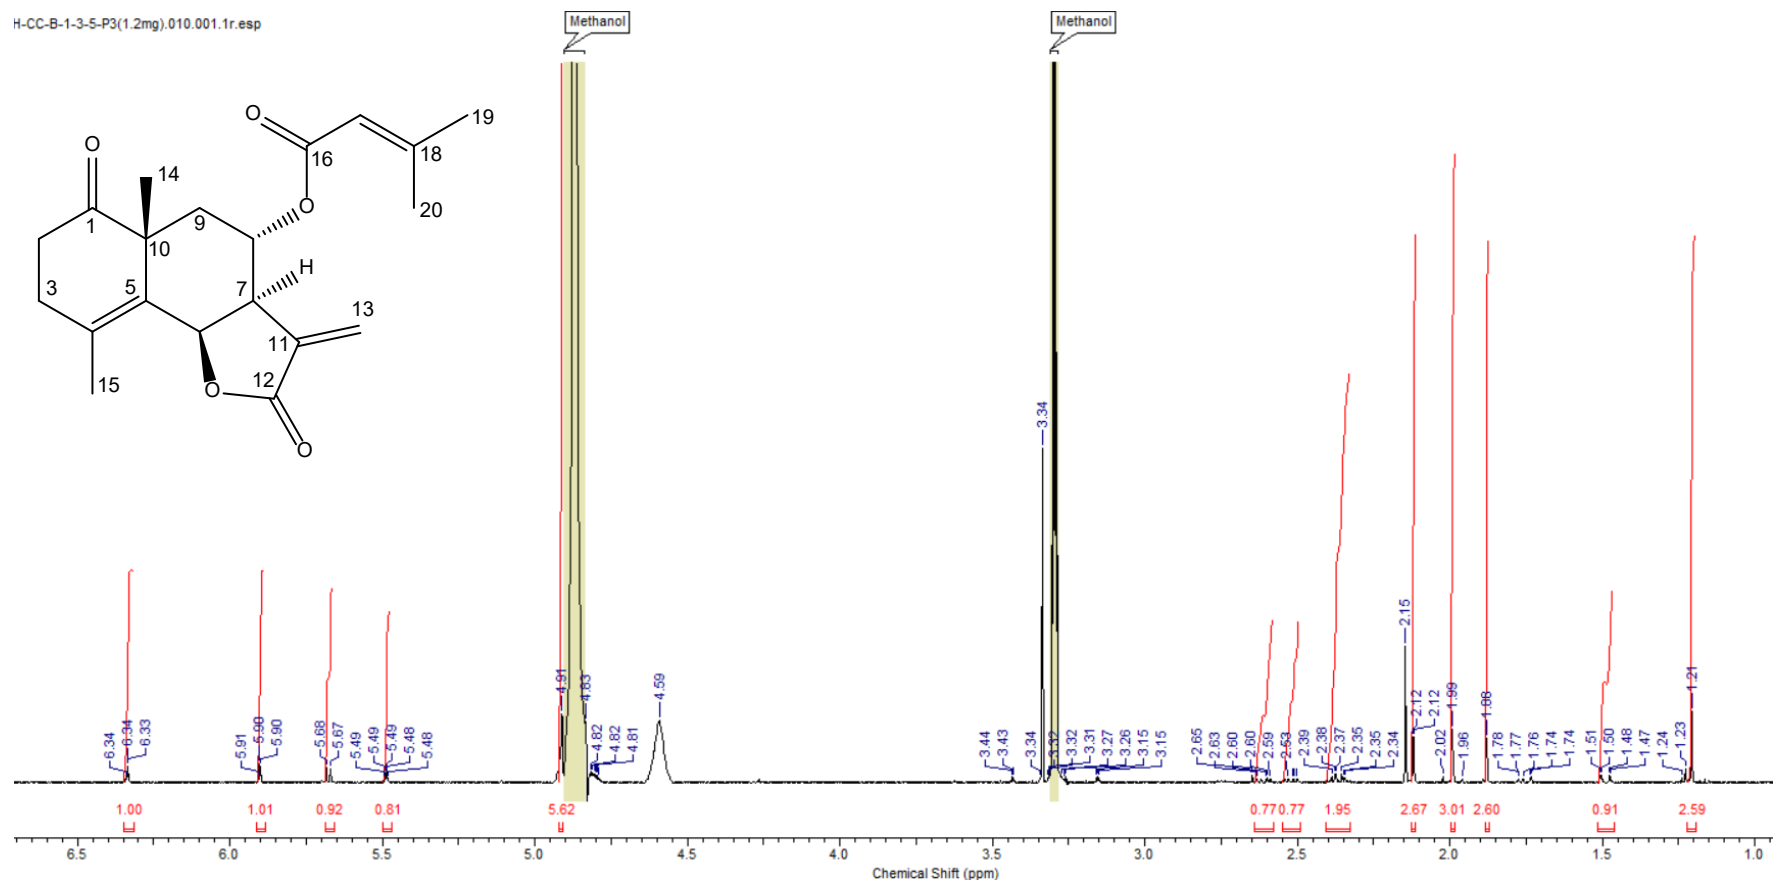

Figure S2. <sup>1</sup>H-NMR spectrum of **1** in MeOD (500 MHz)

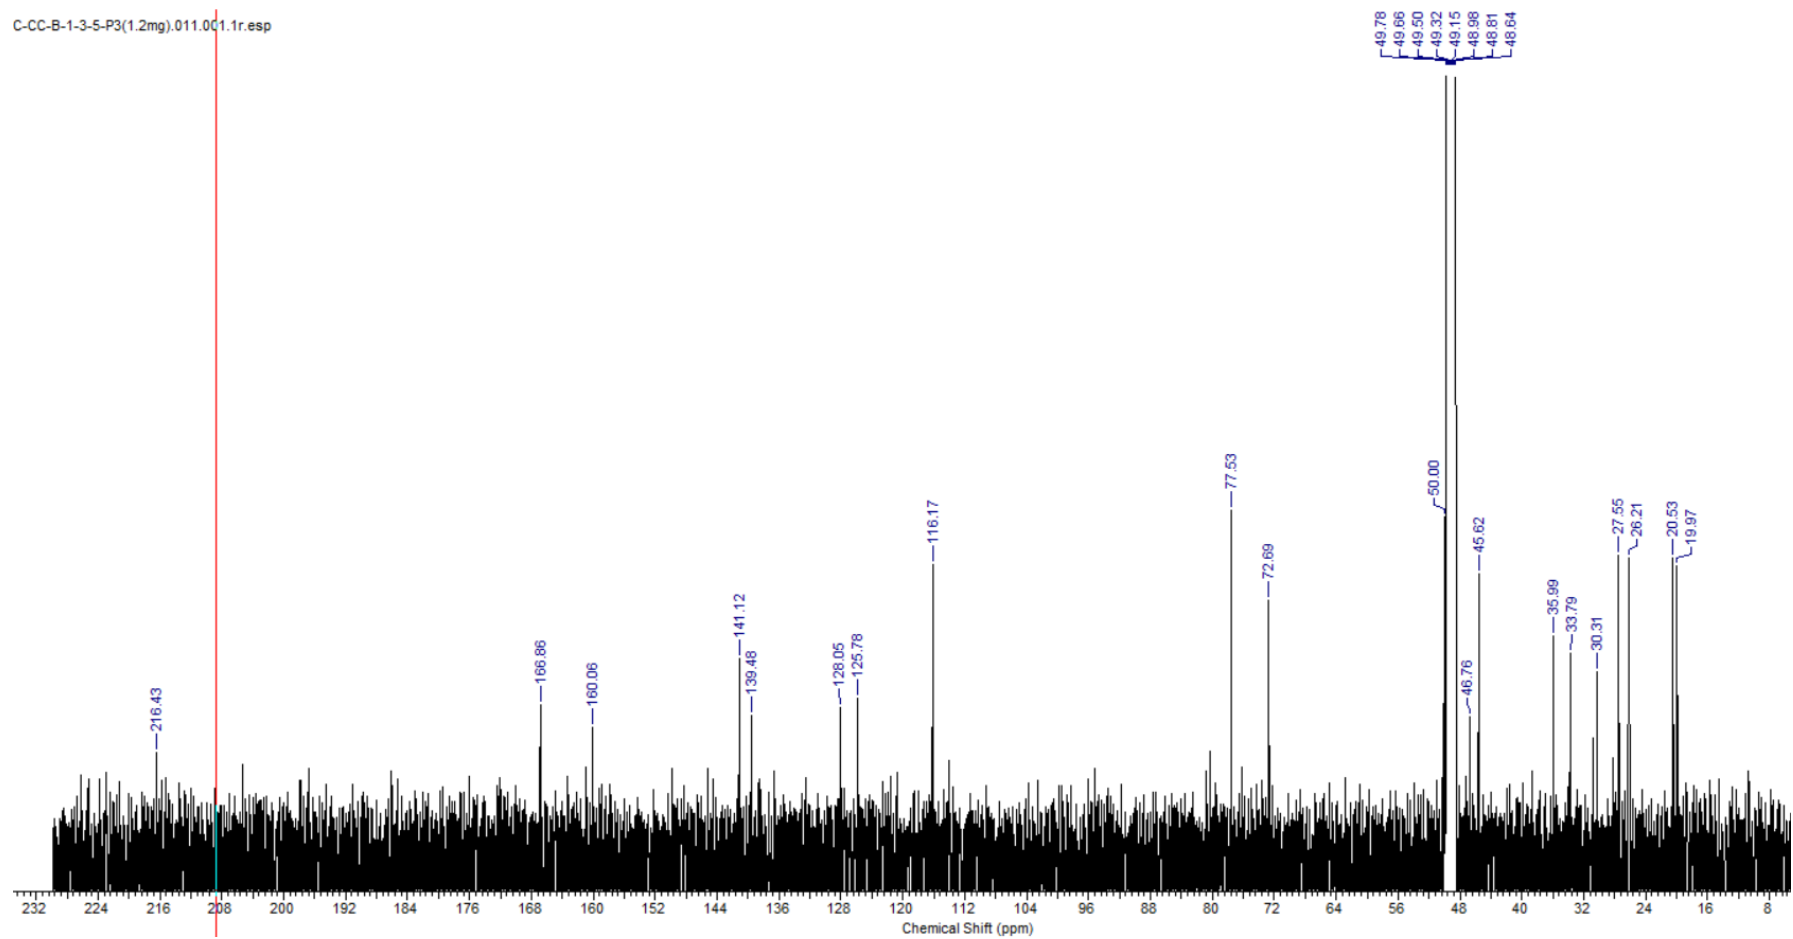

**Figure S3.**  $^{13}\text{C}$ -NMR spectrum of **1** in MeOD (125 MHz)

T-CC-B-1-3-5P3(1.2mg)-2D.015.001.1r.esp

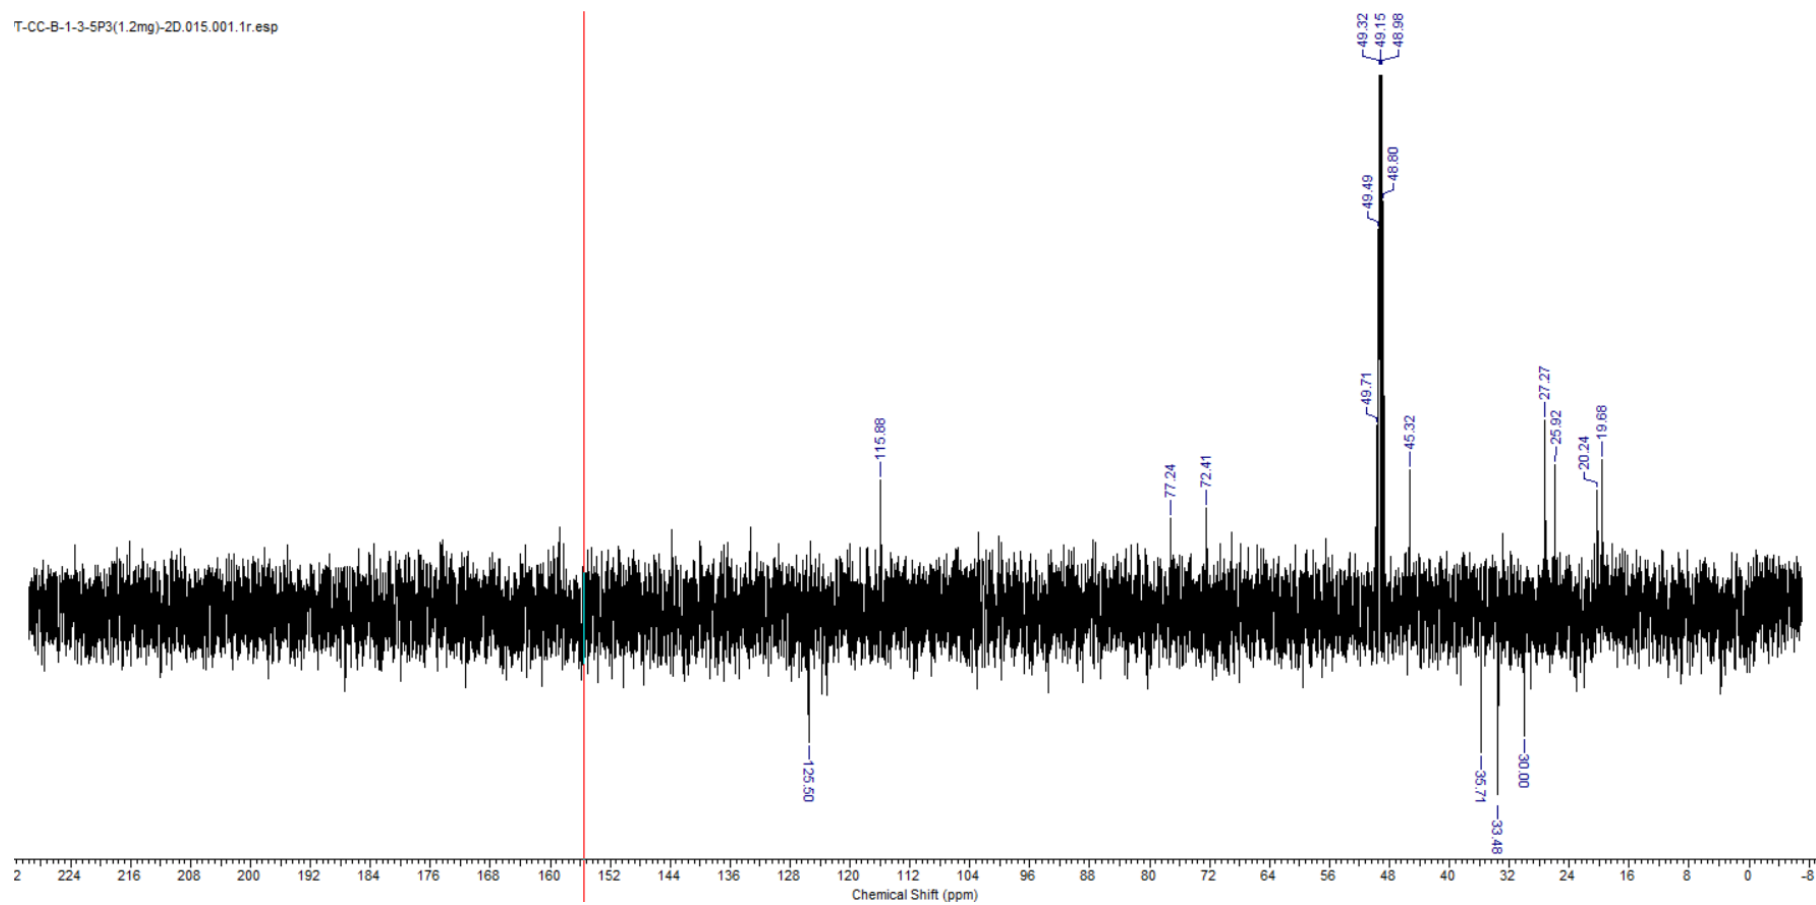

**Figure S4.** <sup>13</sup>C DEPT135 NMR spectrum of **1** in MeOD (125 MHz)

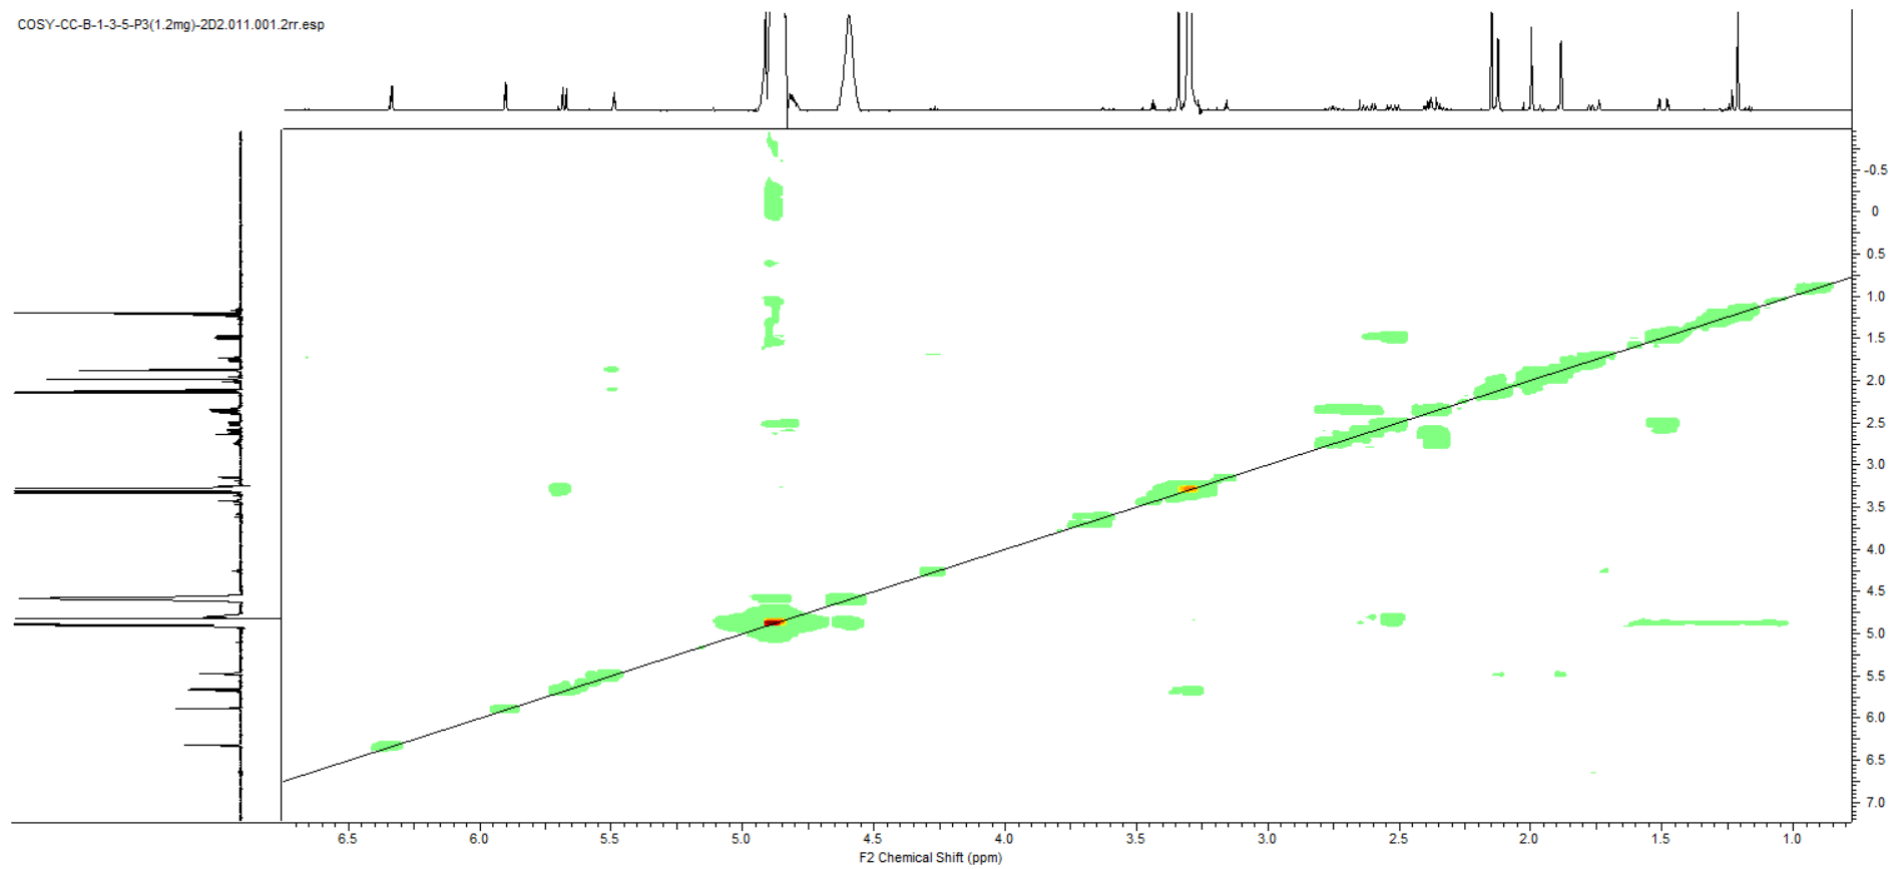

**Figure S5.** <sup>1</sup>H-<sup>1</sup>H COSY spectrum of **1** in MeOD (500 MHz)

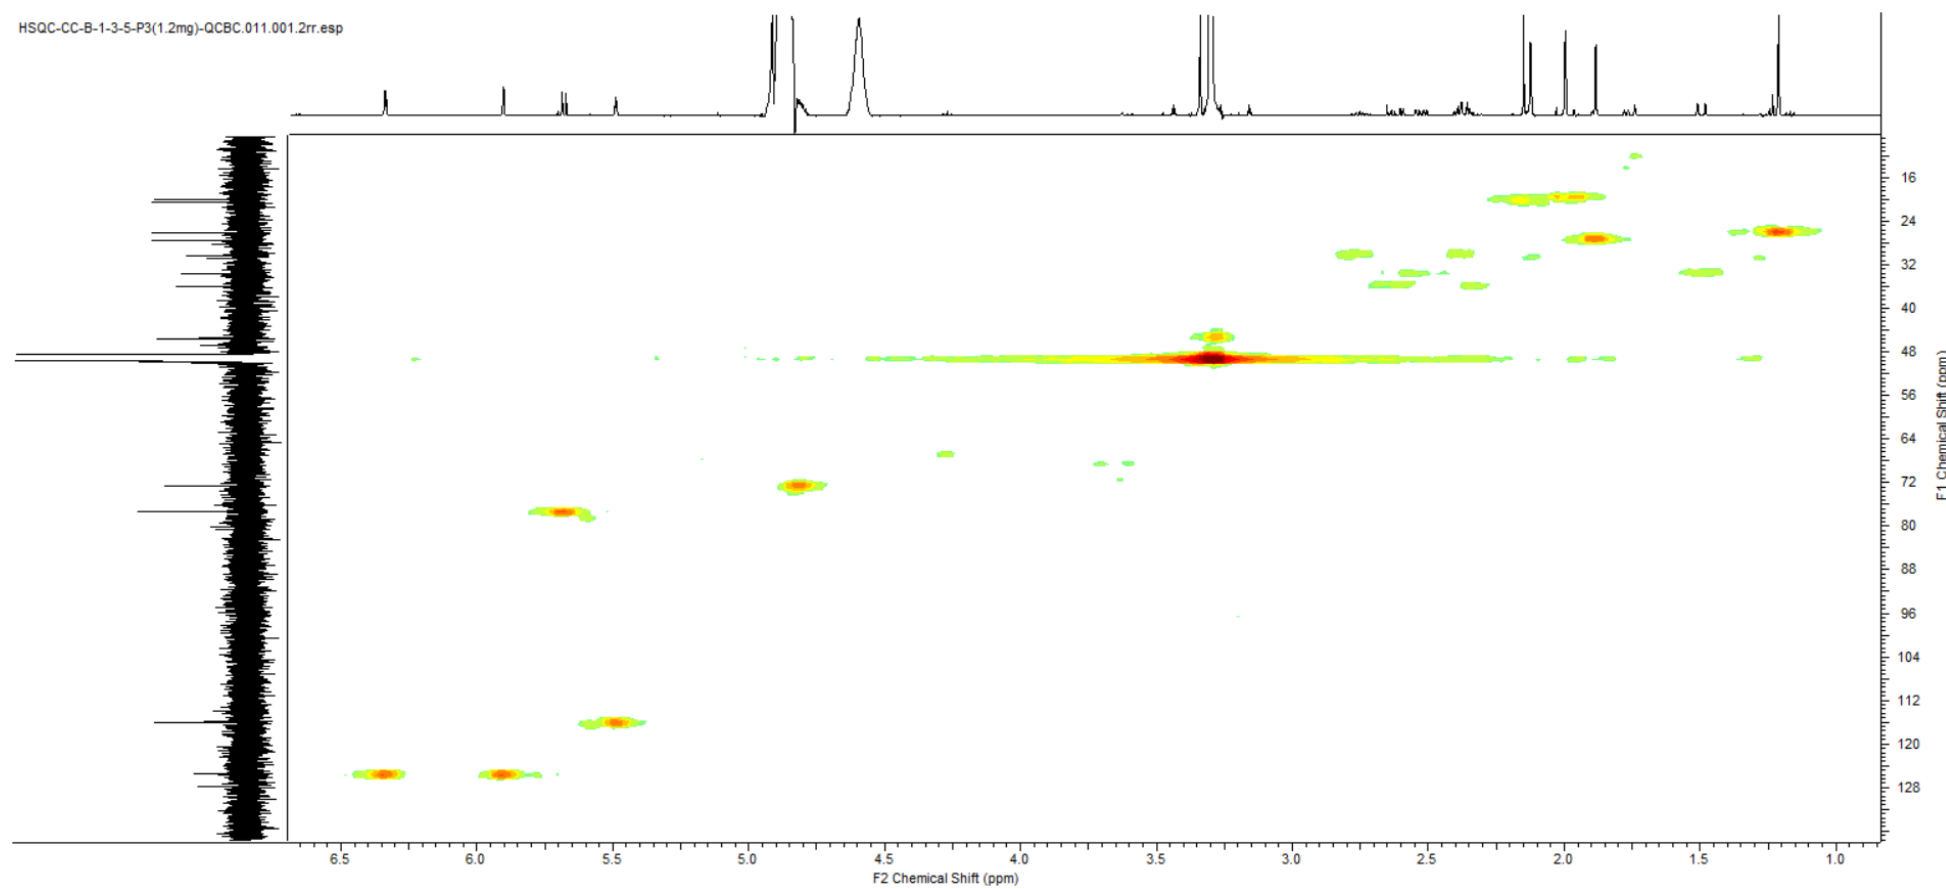

**Figure S6.** HSQC spectrum of **1** in MeOD (500 MHz)

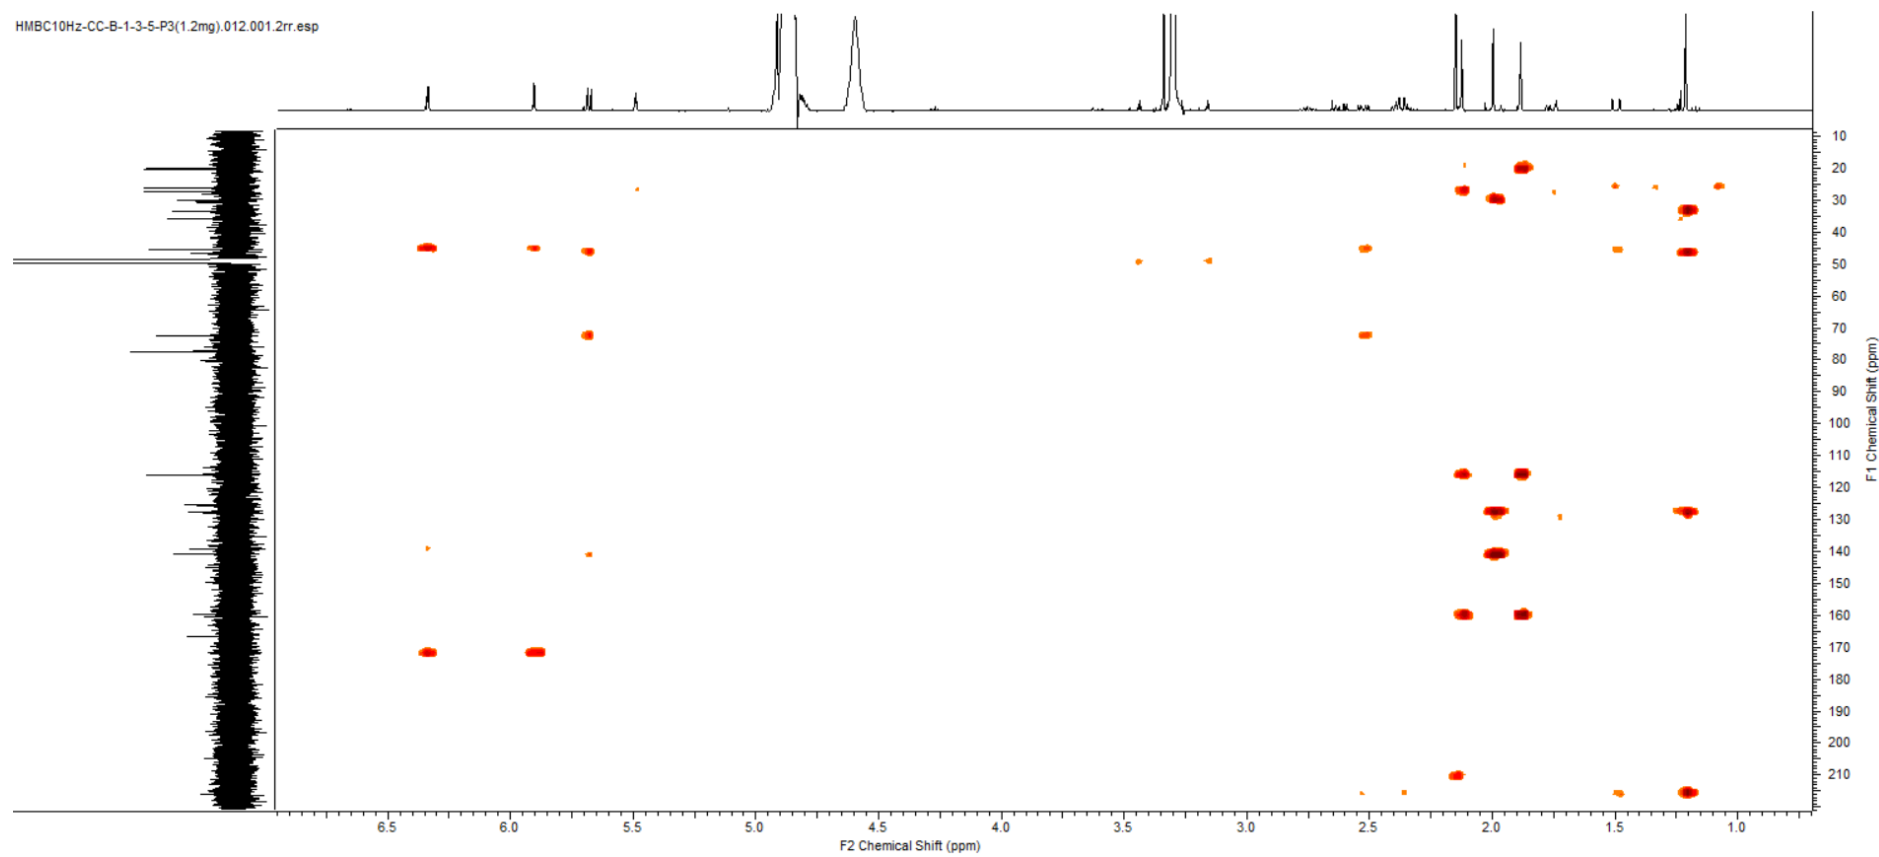

**Figure S7.** HMBC spectrum of **1** in MeOD (500 MHz)

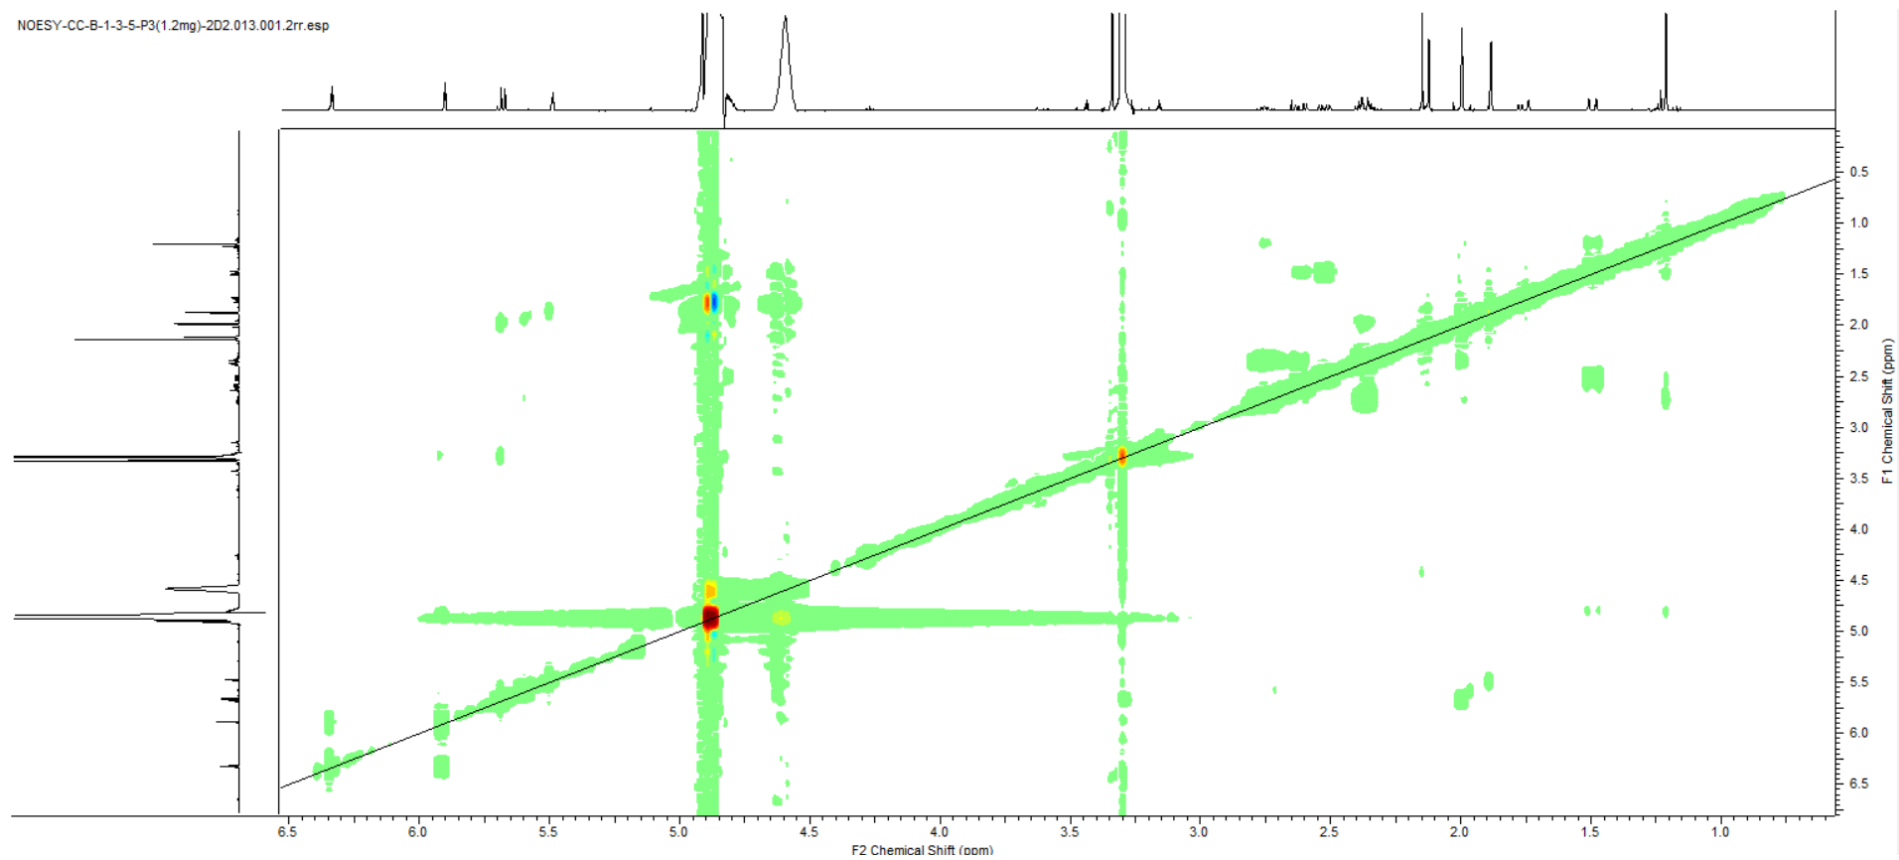

**Figure S8.** PS-NOESY spectrum of **1** in MeOD (500 MHz)

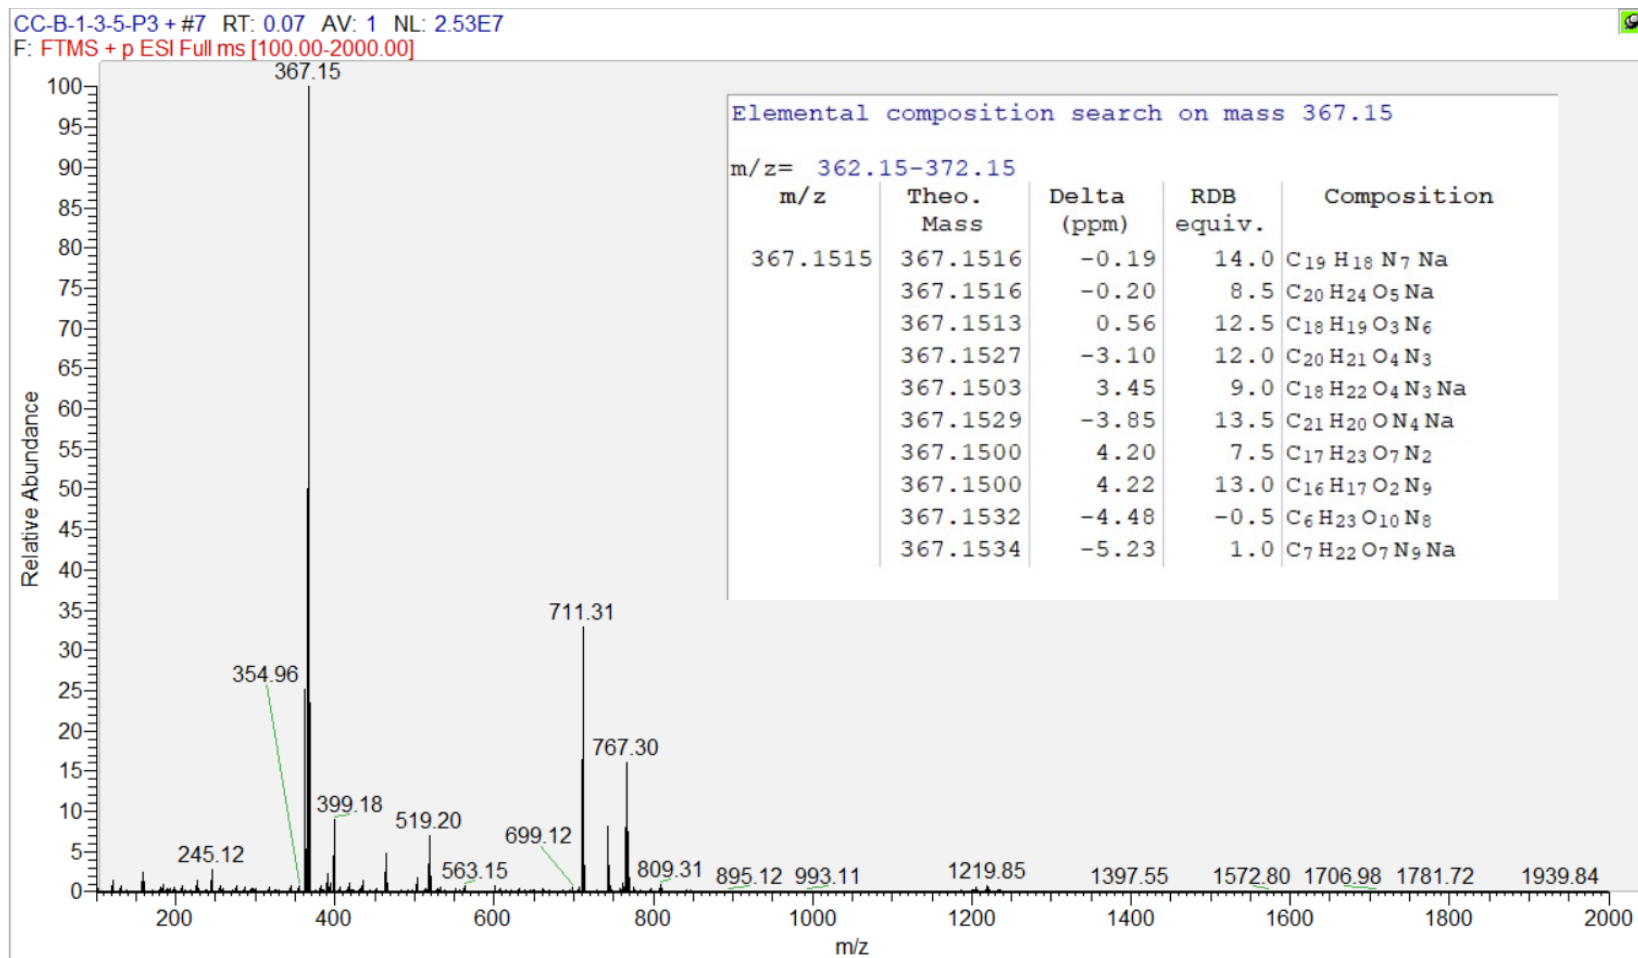

Figure S9. HR-ESI-MS spectrum of **1**



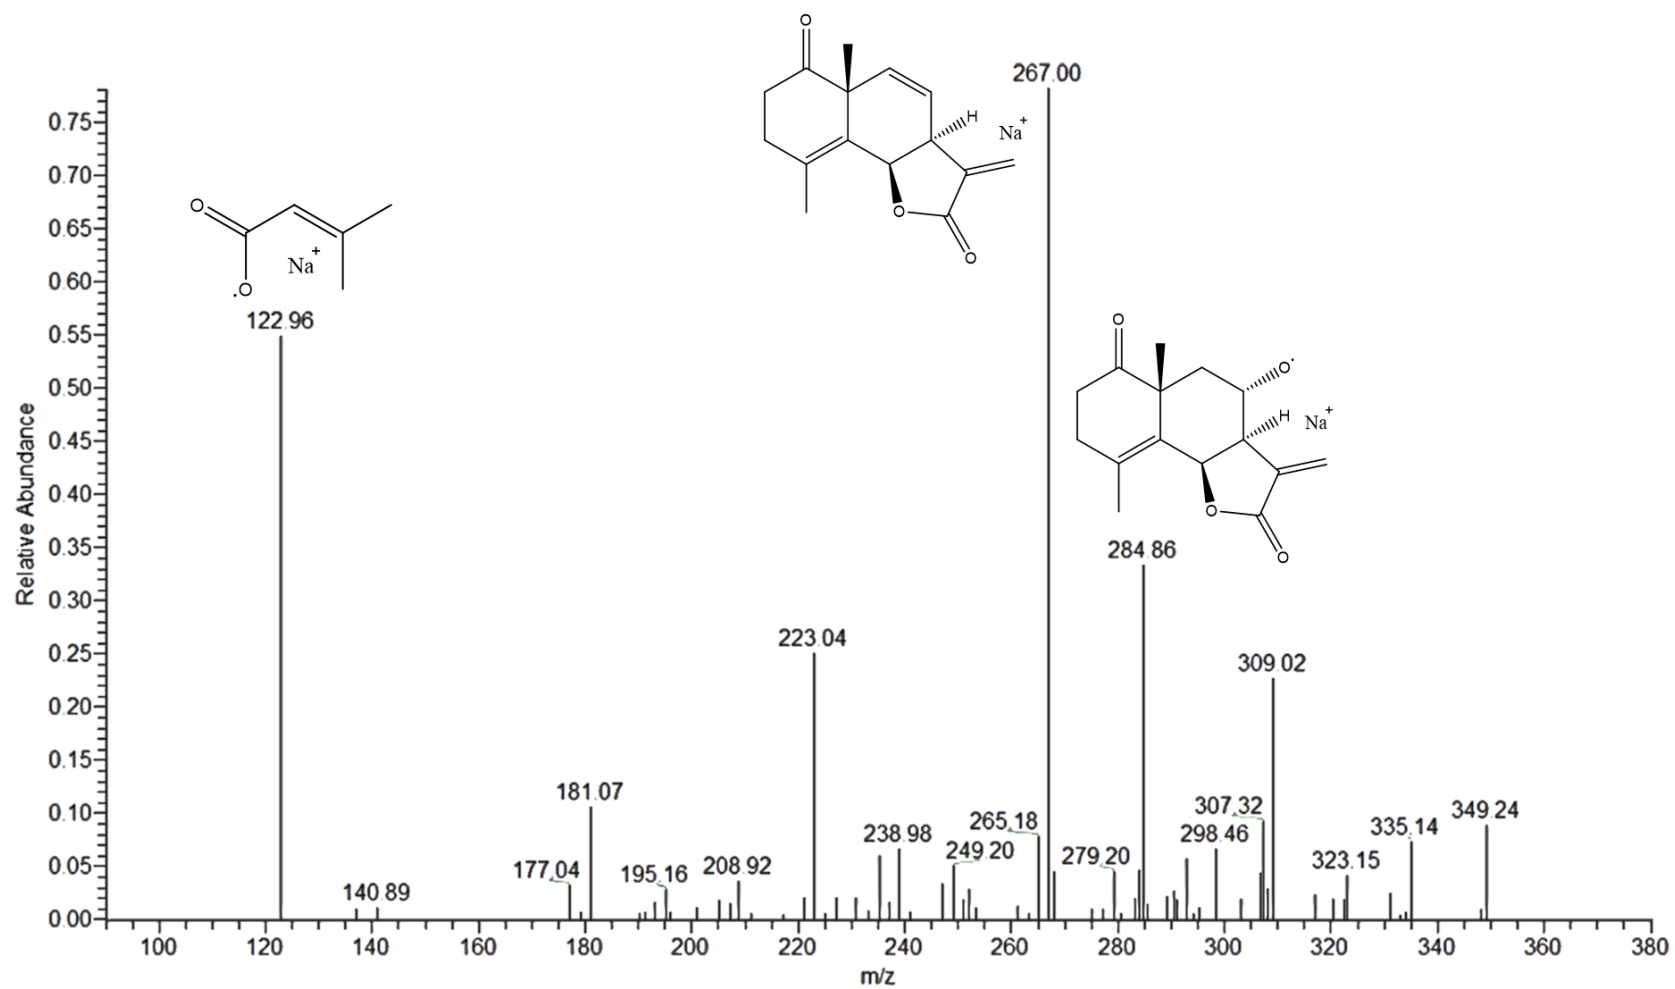

**Figure S10.** ESI-MS/MS spectrum of **1**

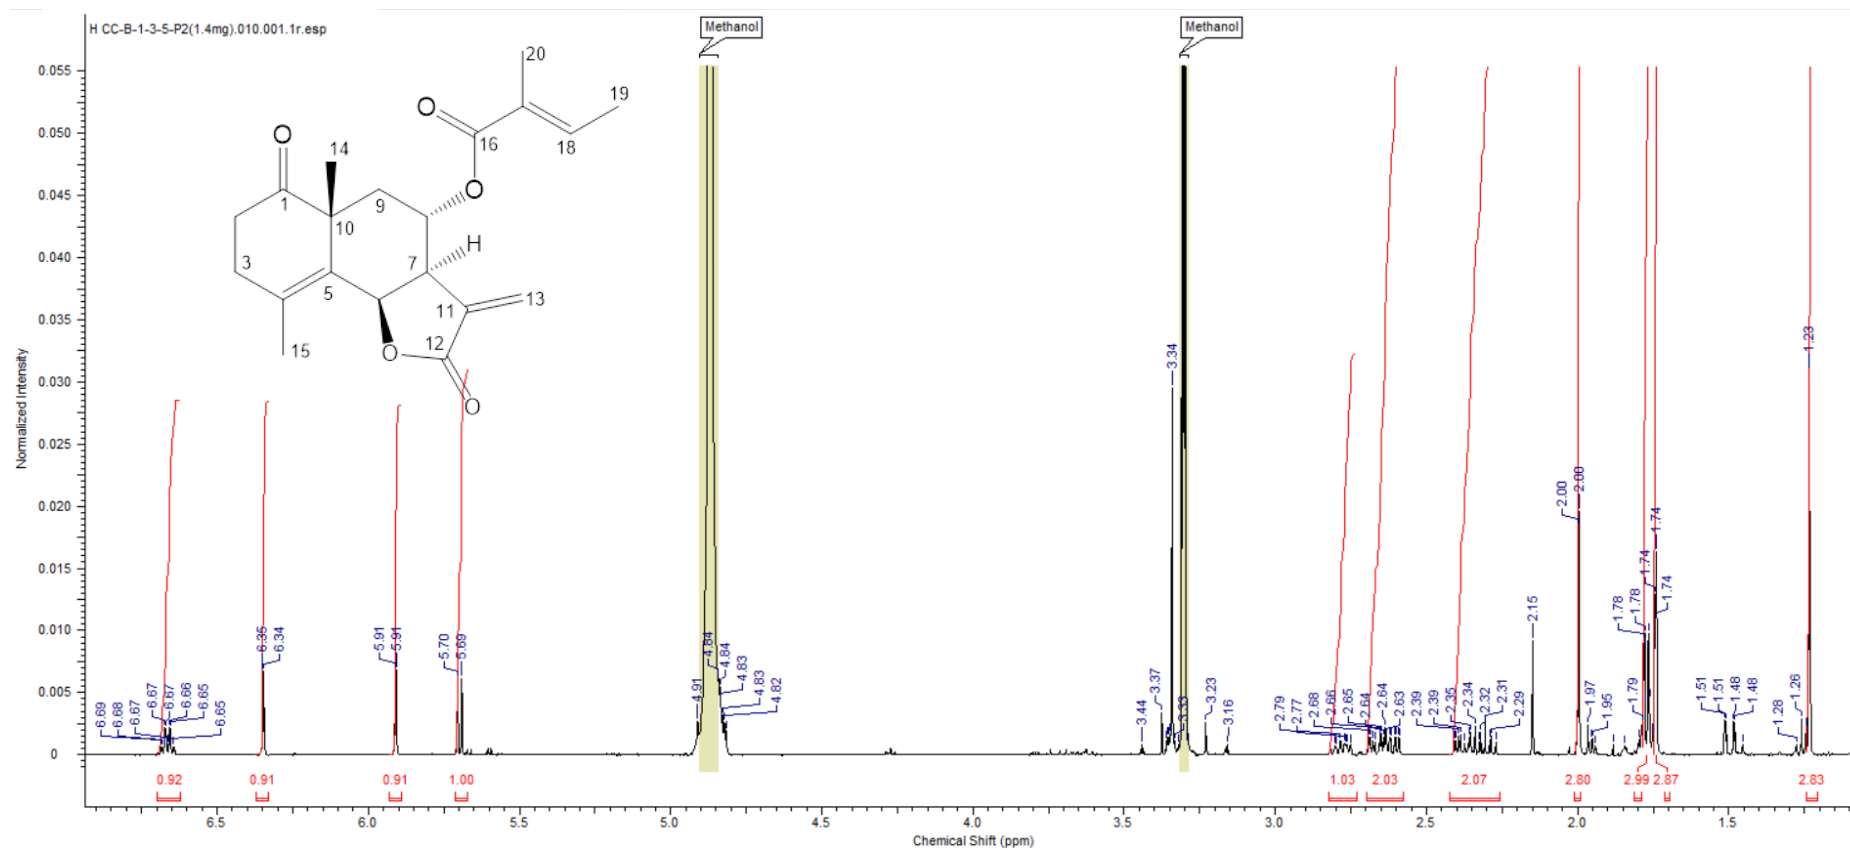

Figure S11.  $^1\text{H}$ -NMR spectrum of **2** in MeOD (500 MHz)

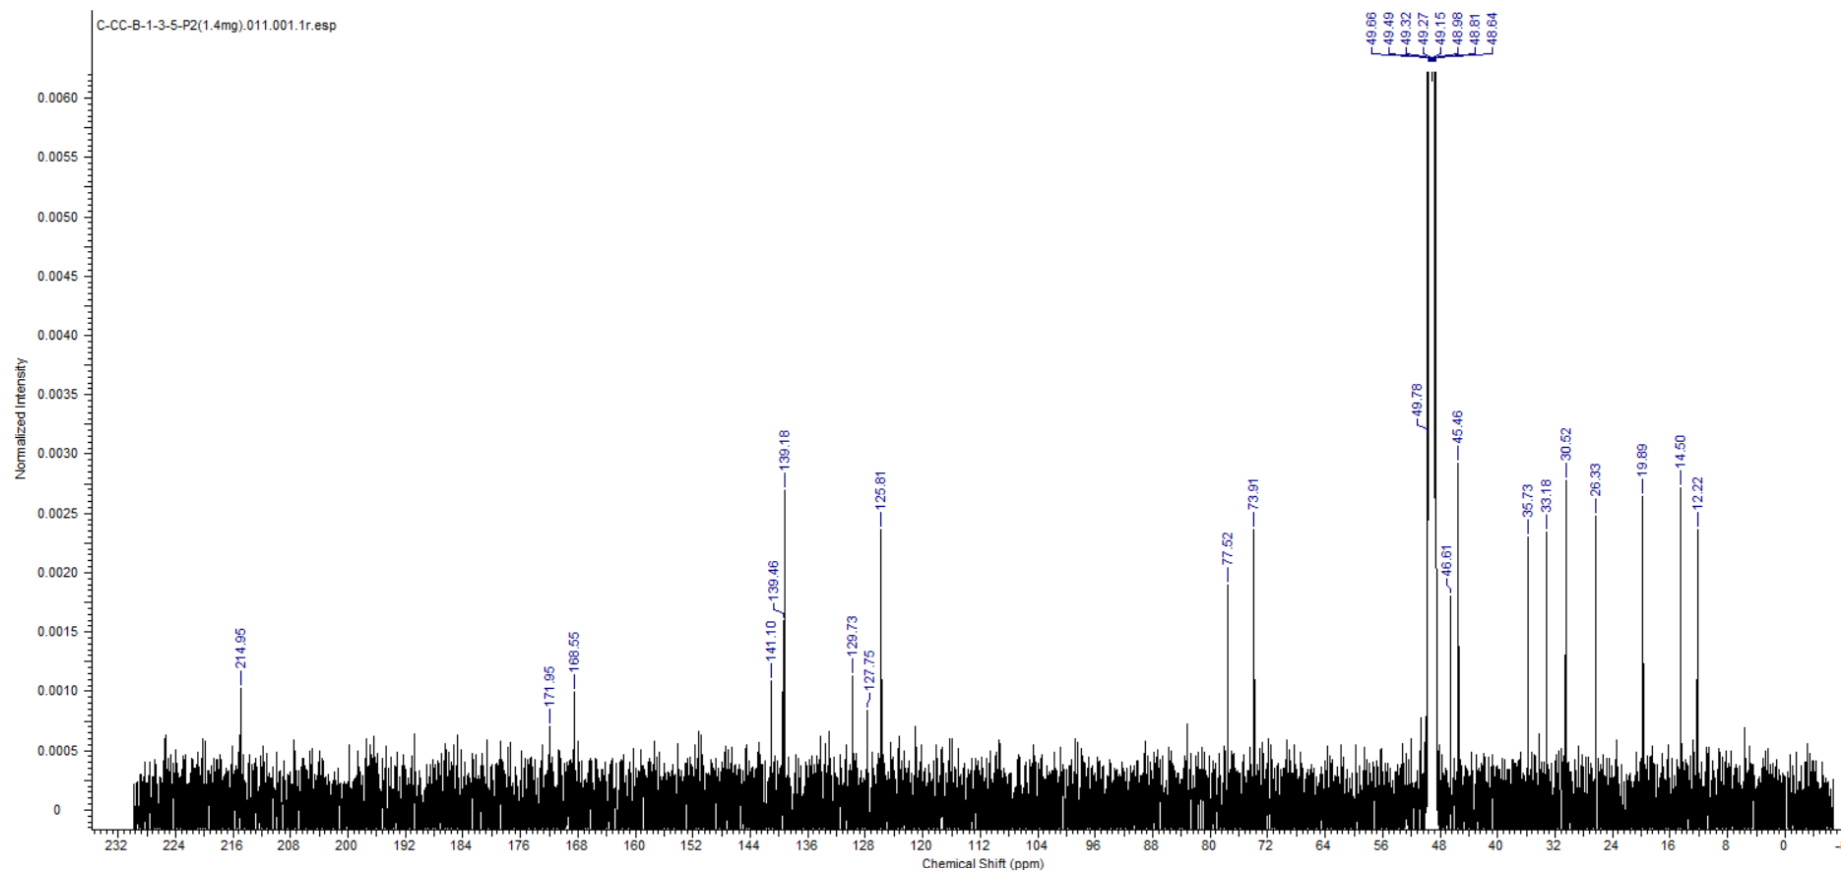

Figure S12.  $^{13}\text{C}$ -NMR spectrum of **2** in MeOD (125 MHz)

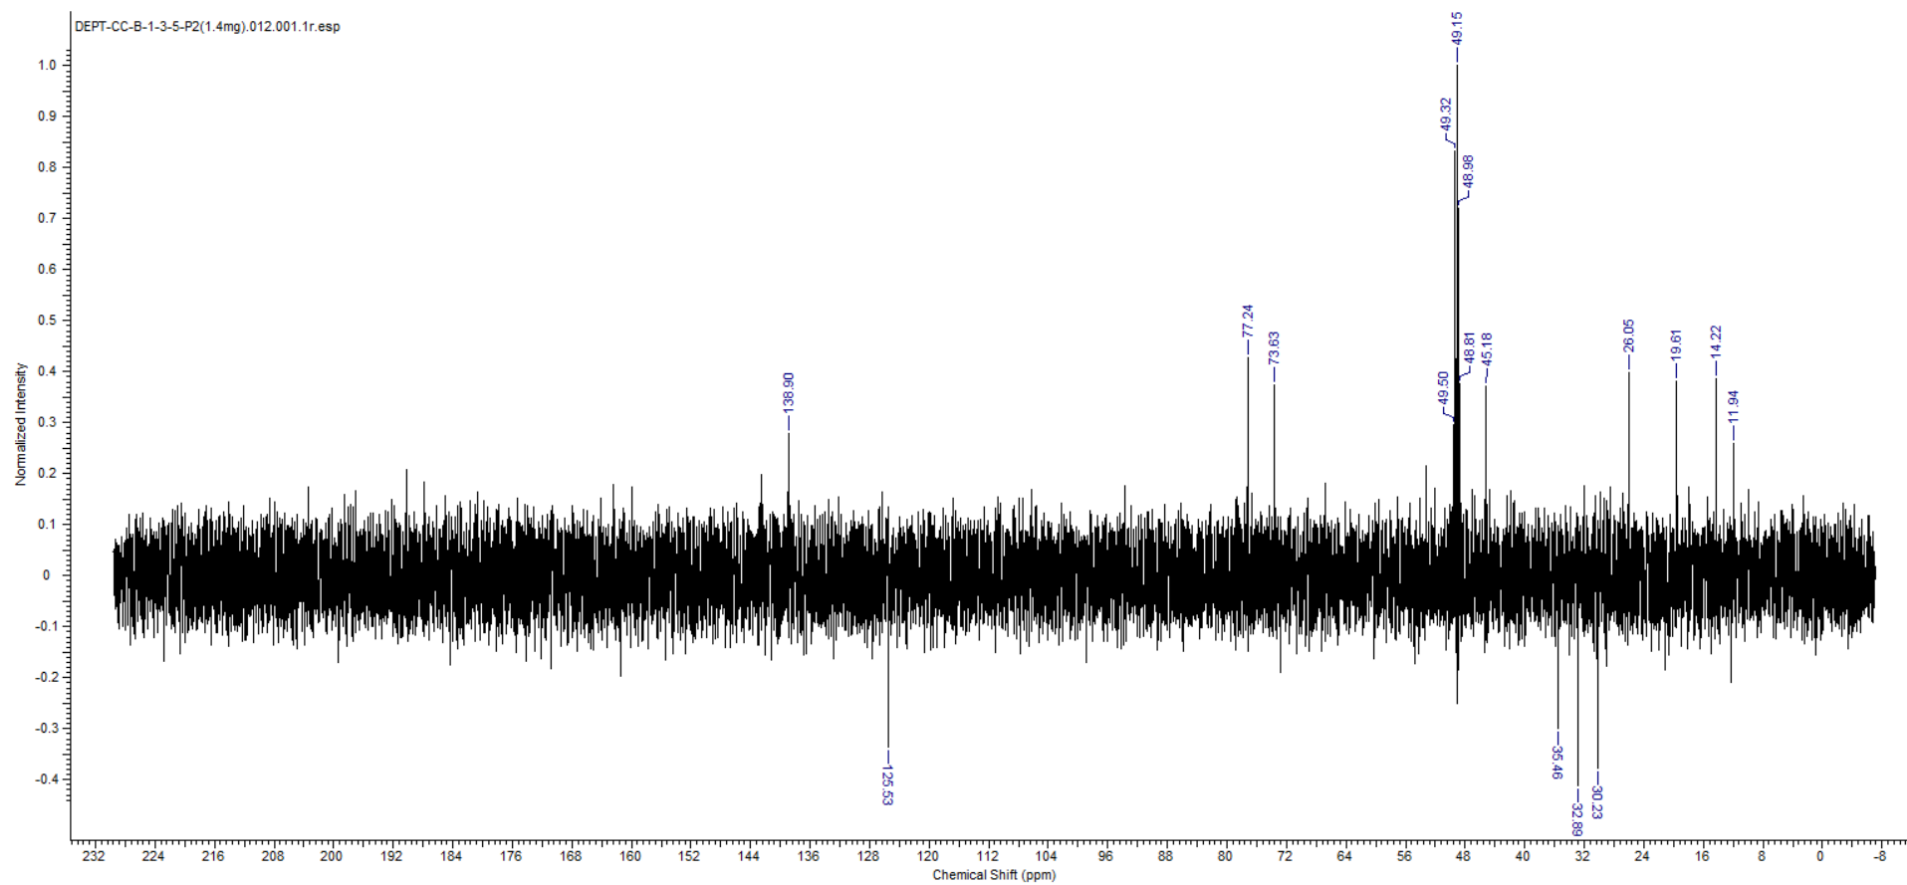

**Figure S13.**  $^{13}\text{C}$  DEPT135 NMR spectrum of **2** in MeOD (125 MHz)

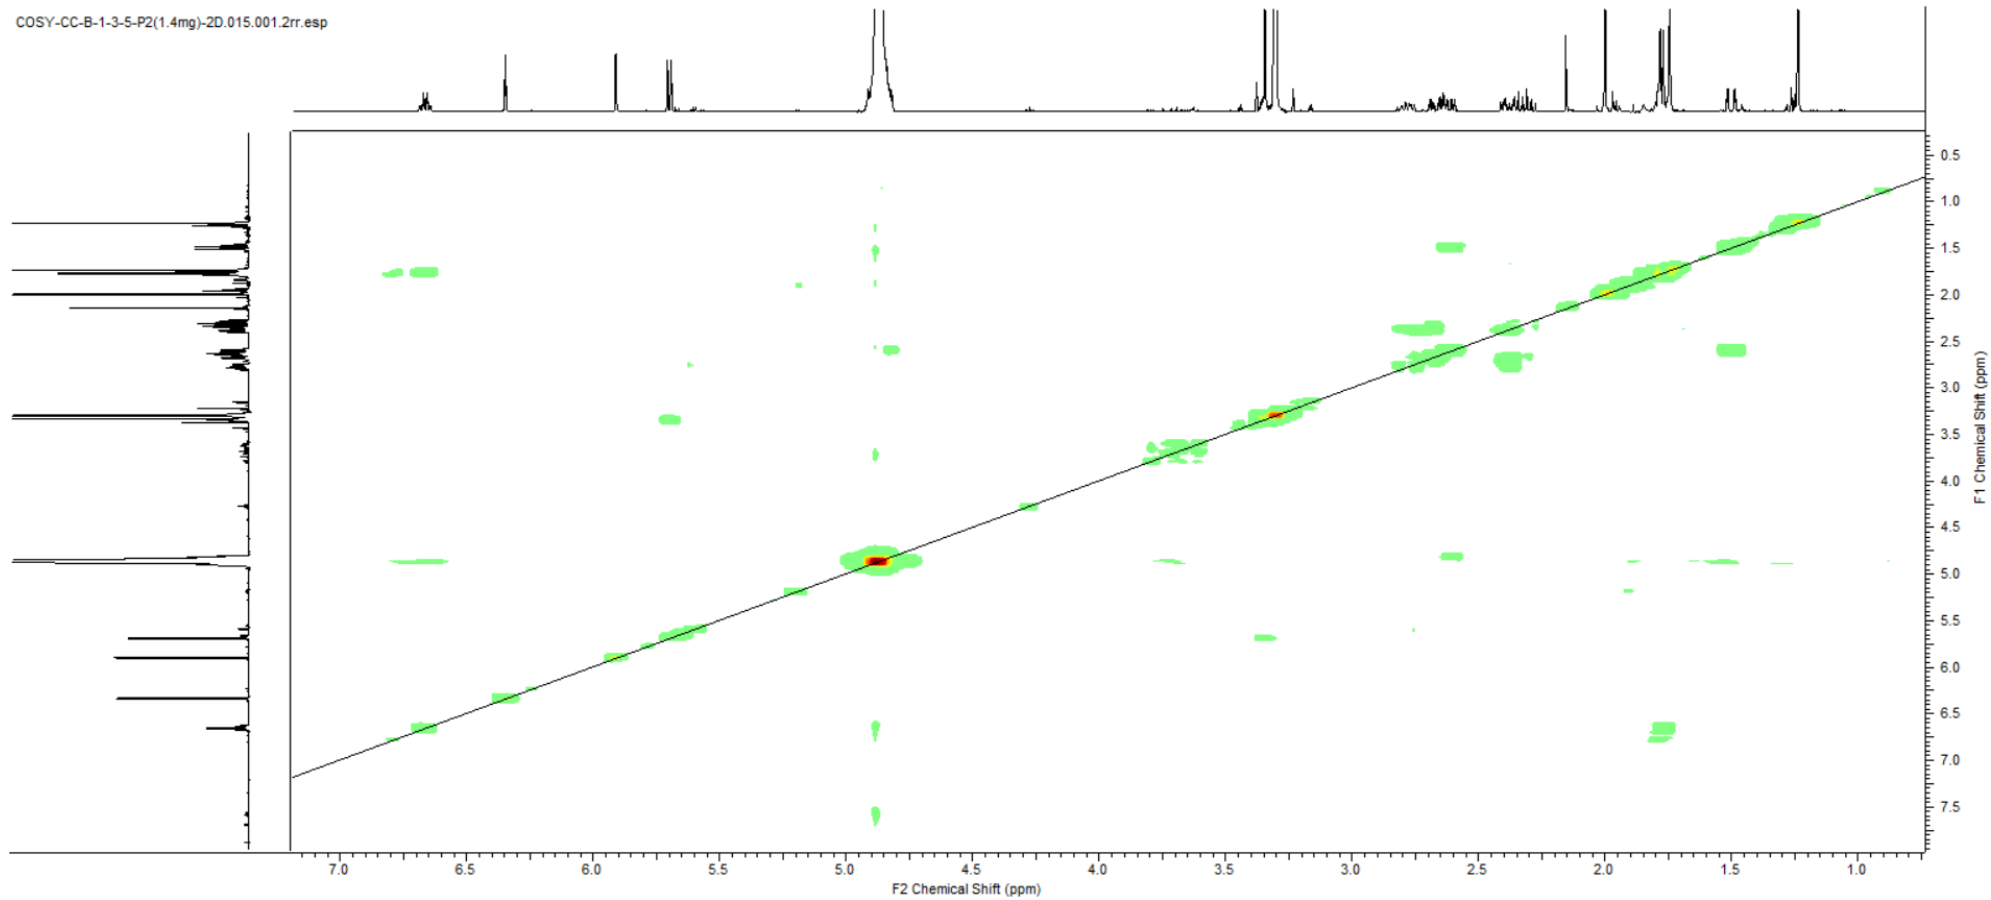

**Figure S14.** <sup>1</sup>H-<sup>1</sup>H COSY spectrum of **2** in MeOD (500 MHz)

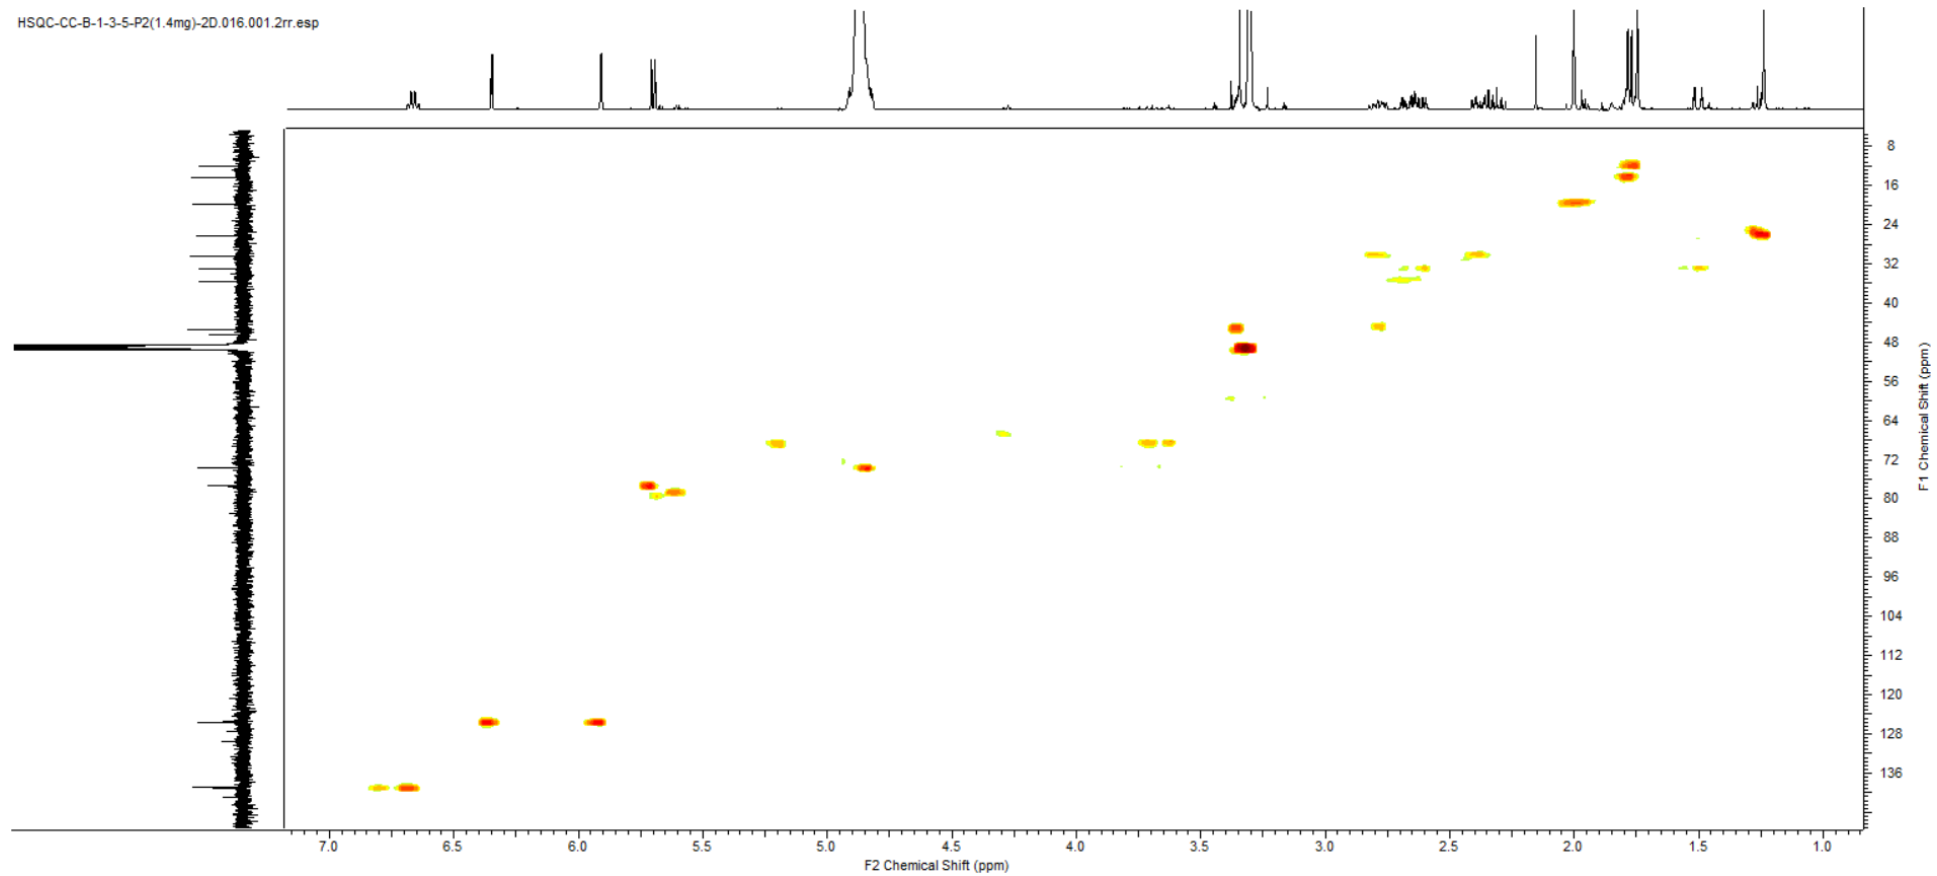

**Figure S15.** HSQC spectrum of **2** in MeOD (500 MHz)

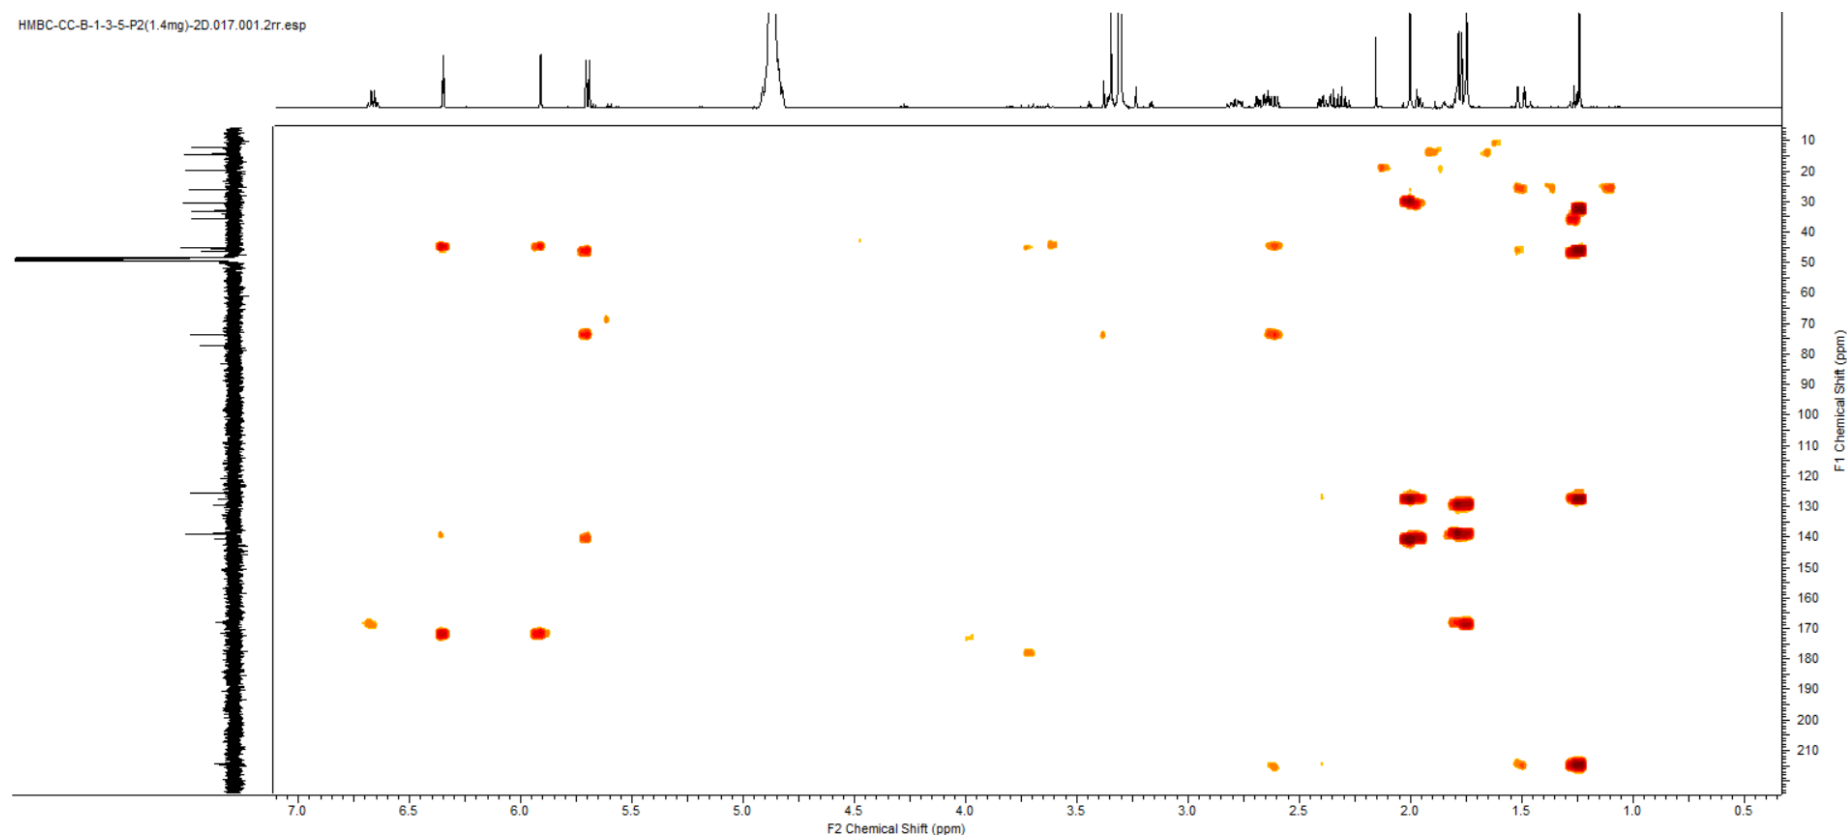

**Figure S16.** HMBC spectrum of **2** in MeOD (500 MHz)





CC-B-1-3-5-P2 + #4 RT: 0.04 AV: 1 NL: 3.17E7  
 F: FTMS + p ESI Full ms [100.00-2000.00]

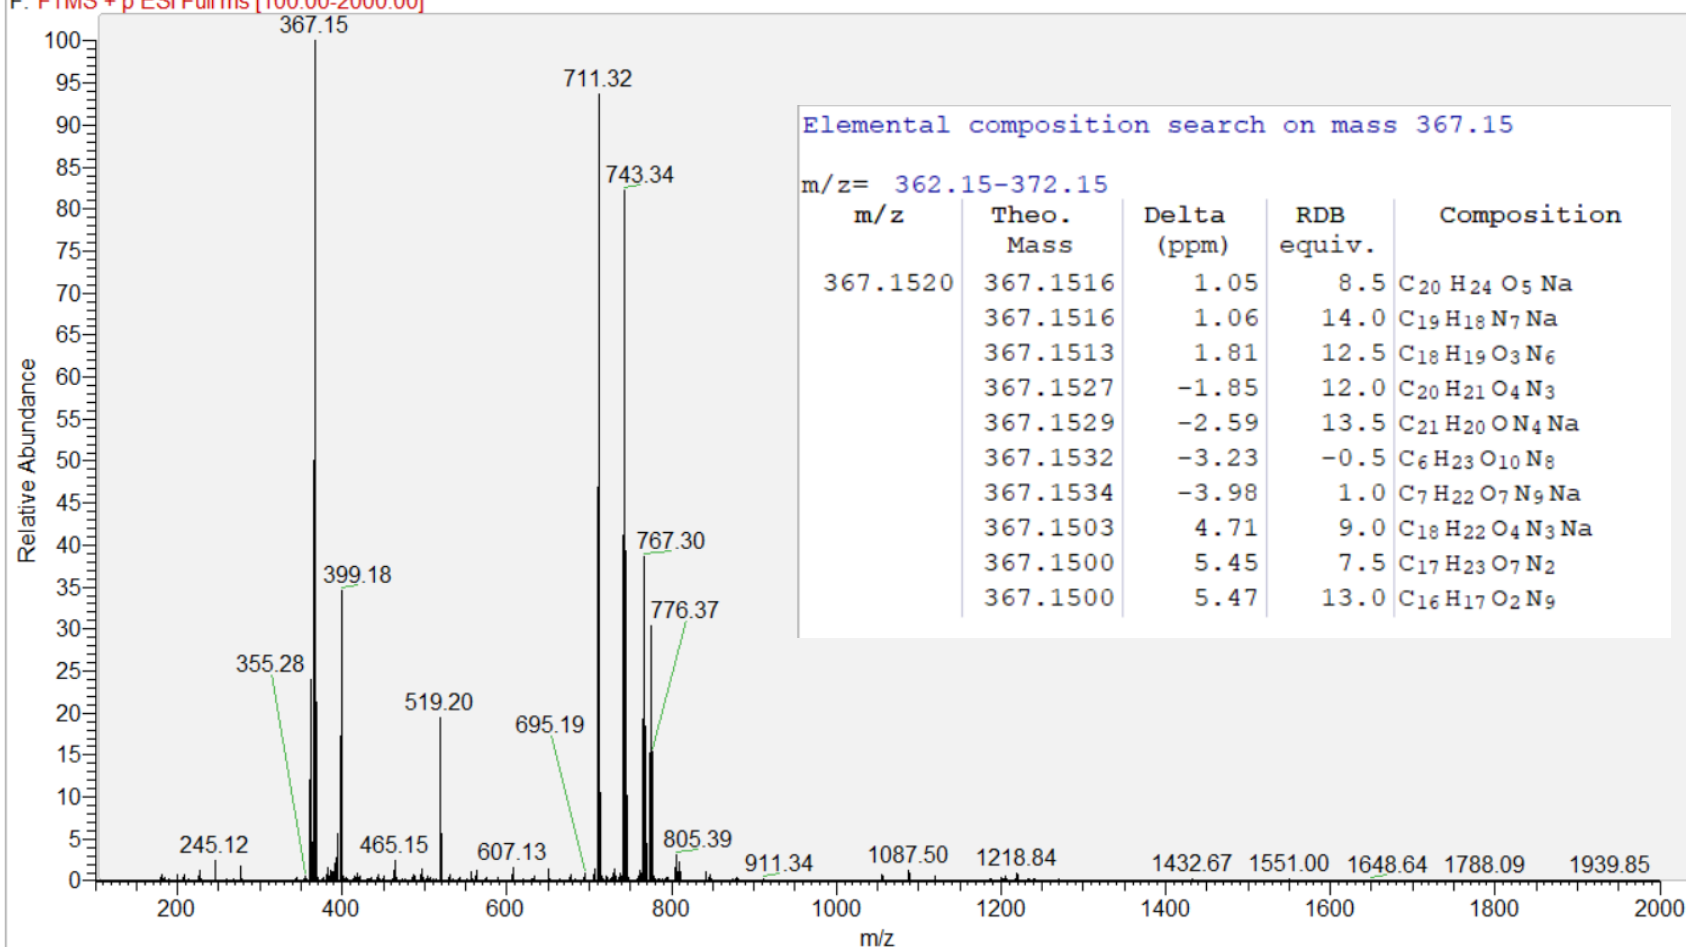

Figure S18. HR-ESI-MS spectrum of **2**

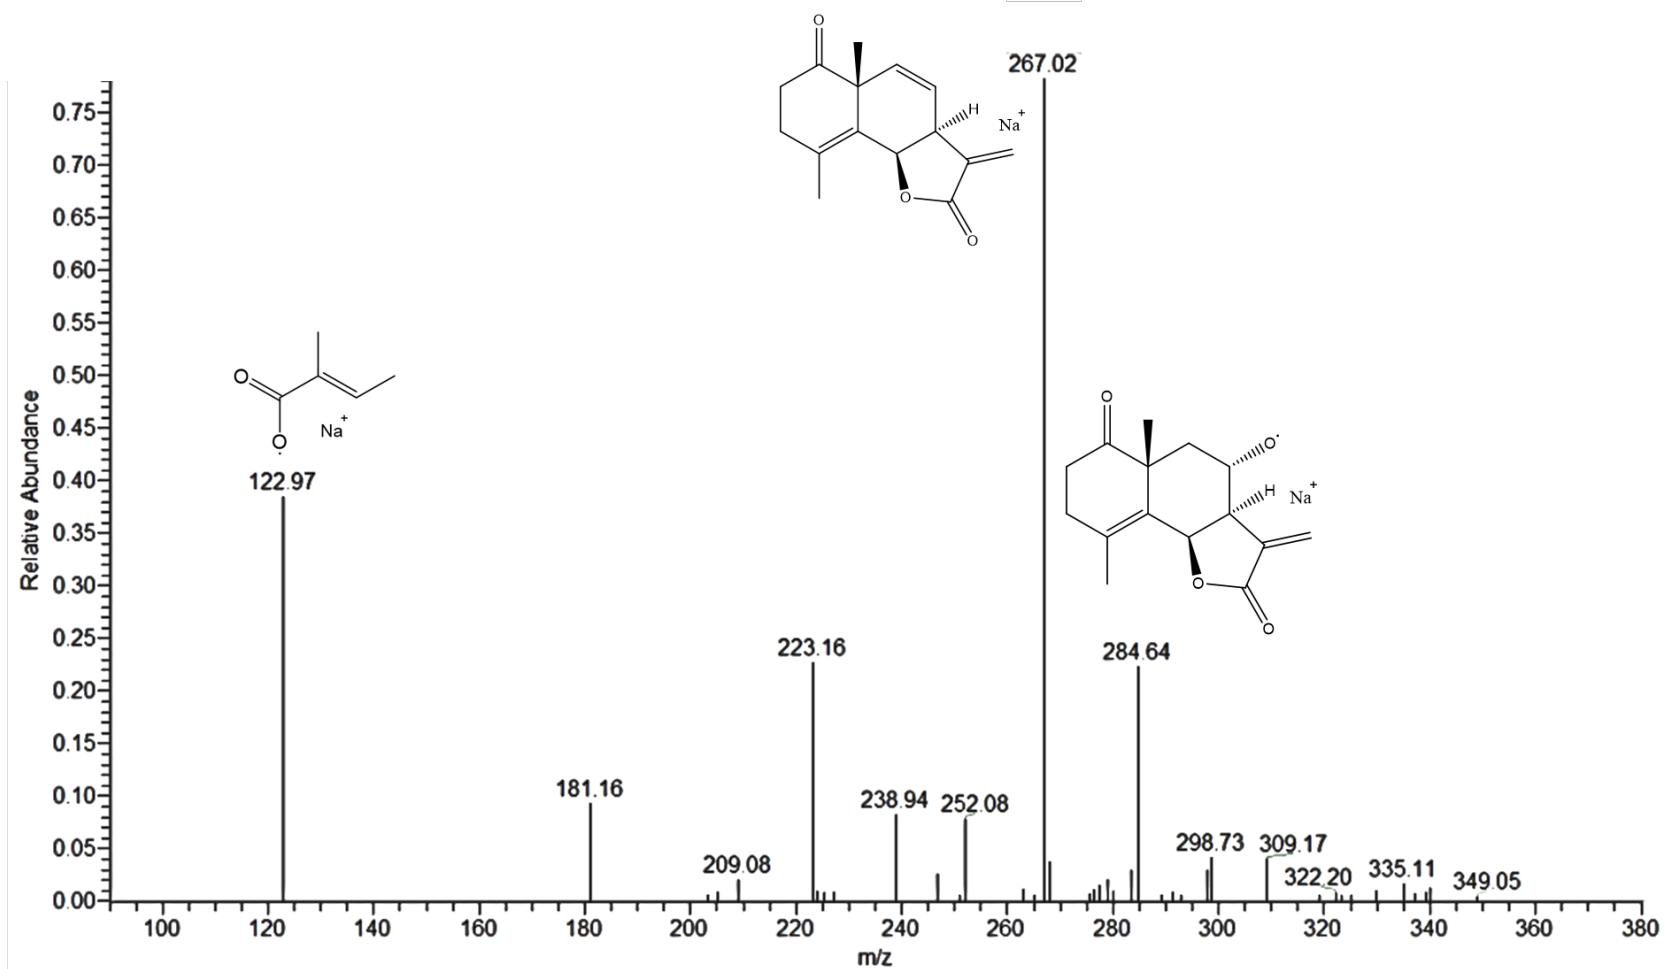

**Figure S19.** ESI-MS/MS spectrum of **2**

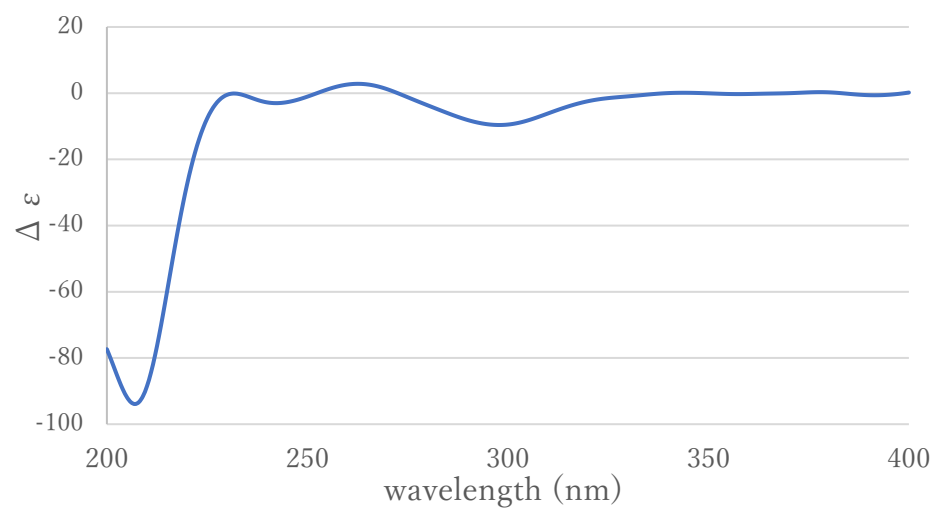

**Figure S20.** Experimental CD spectrum of **2** in CH<sub>3</sub>CN

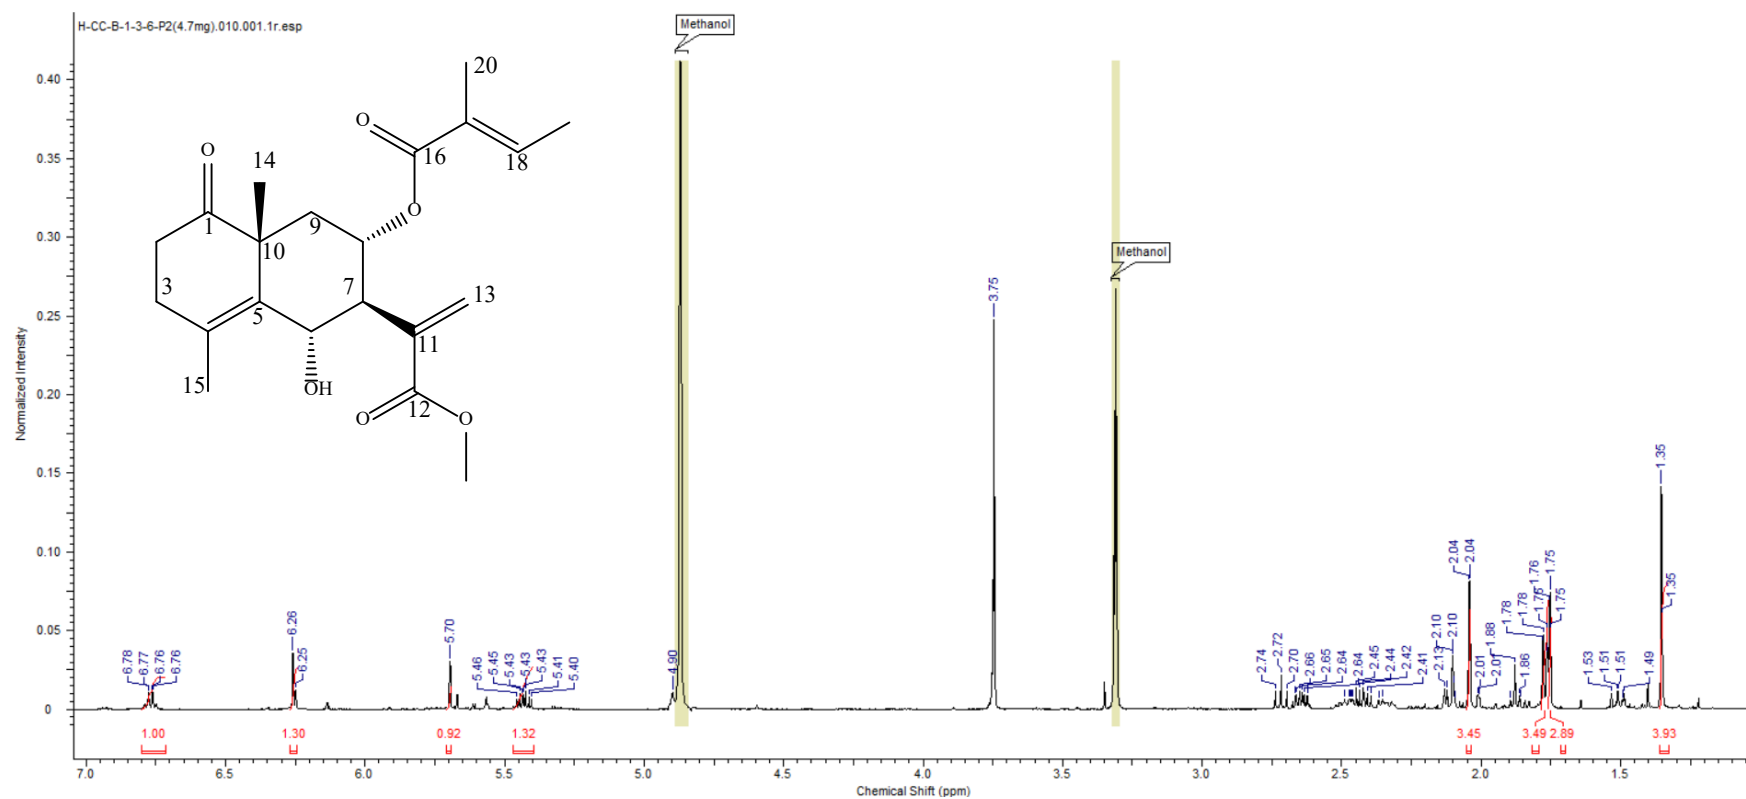

**Figure S21.**  $^1\text{H}$ -NMR spectrum of **3** in MeOD (500 MHz)

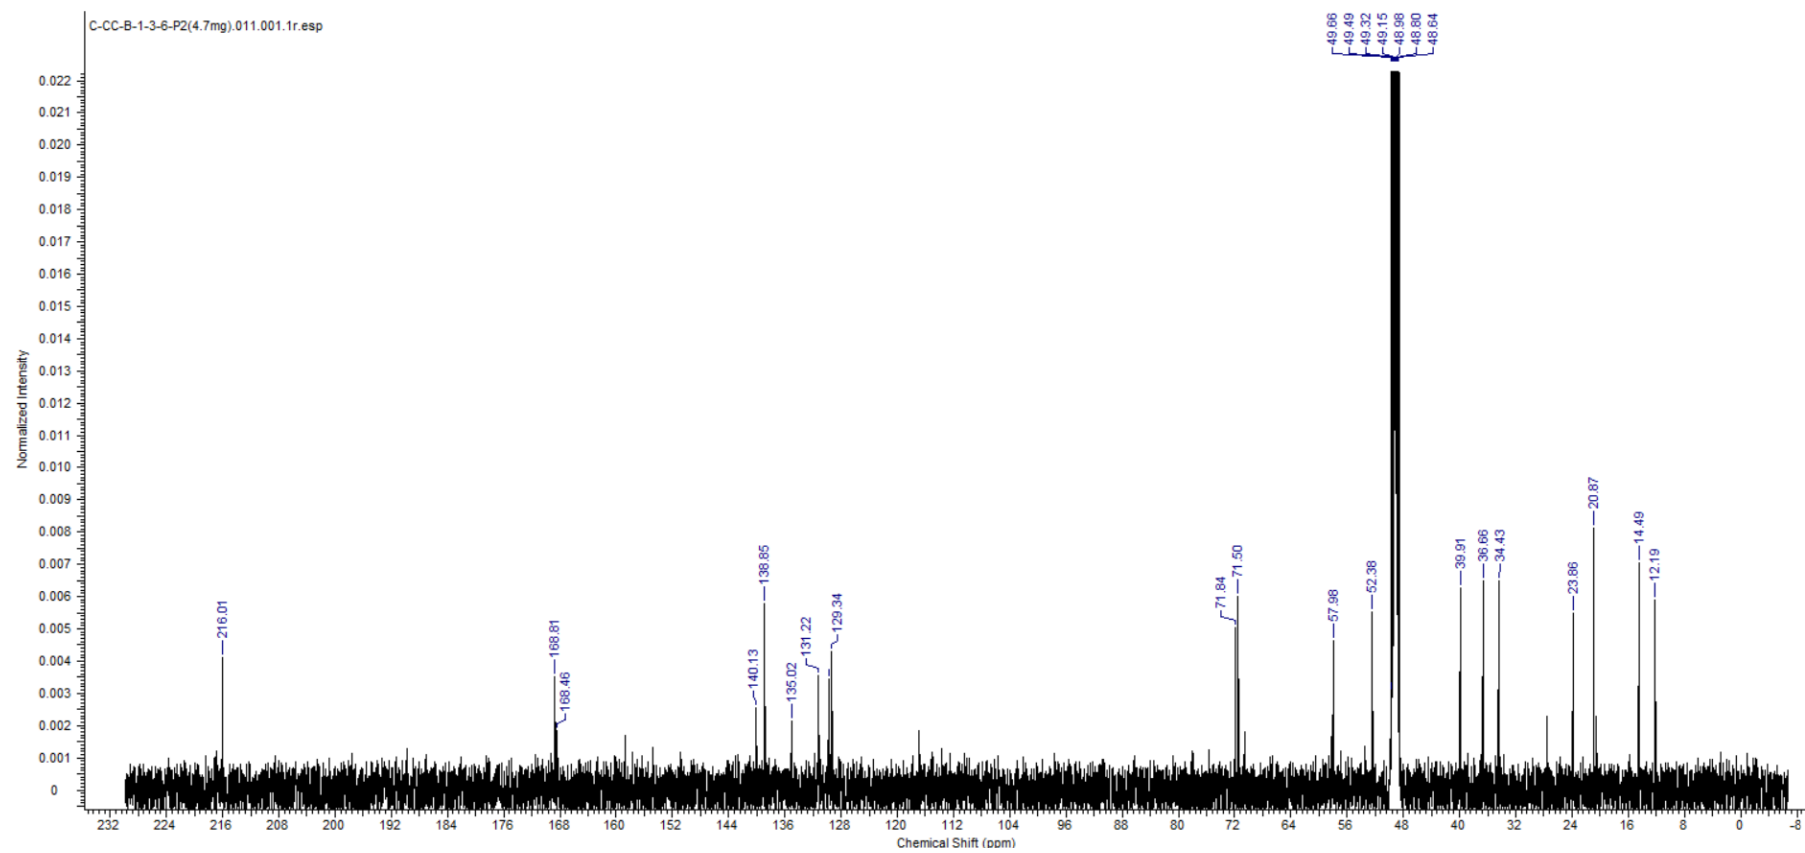

**Figure S22.**  $^{13}\text{C}$ -NMR spectrum of **3** in MeOD (125 MHz)

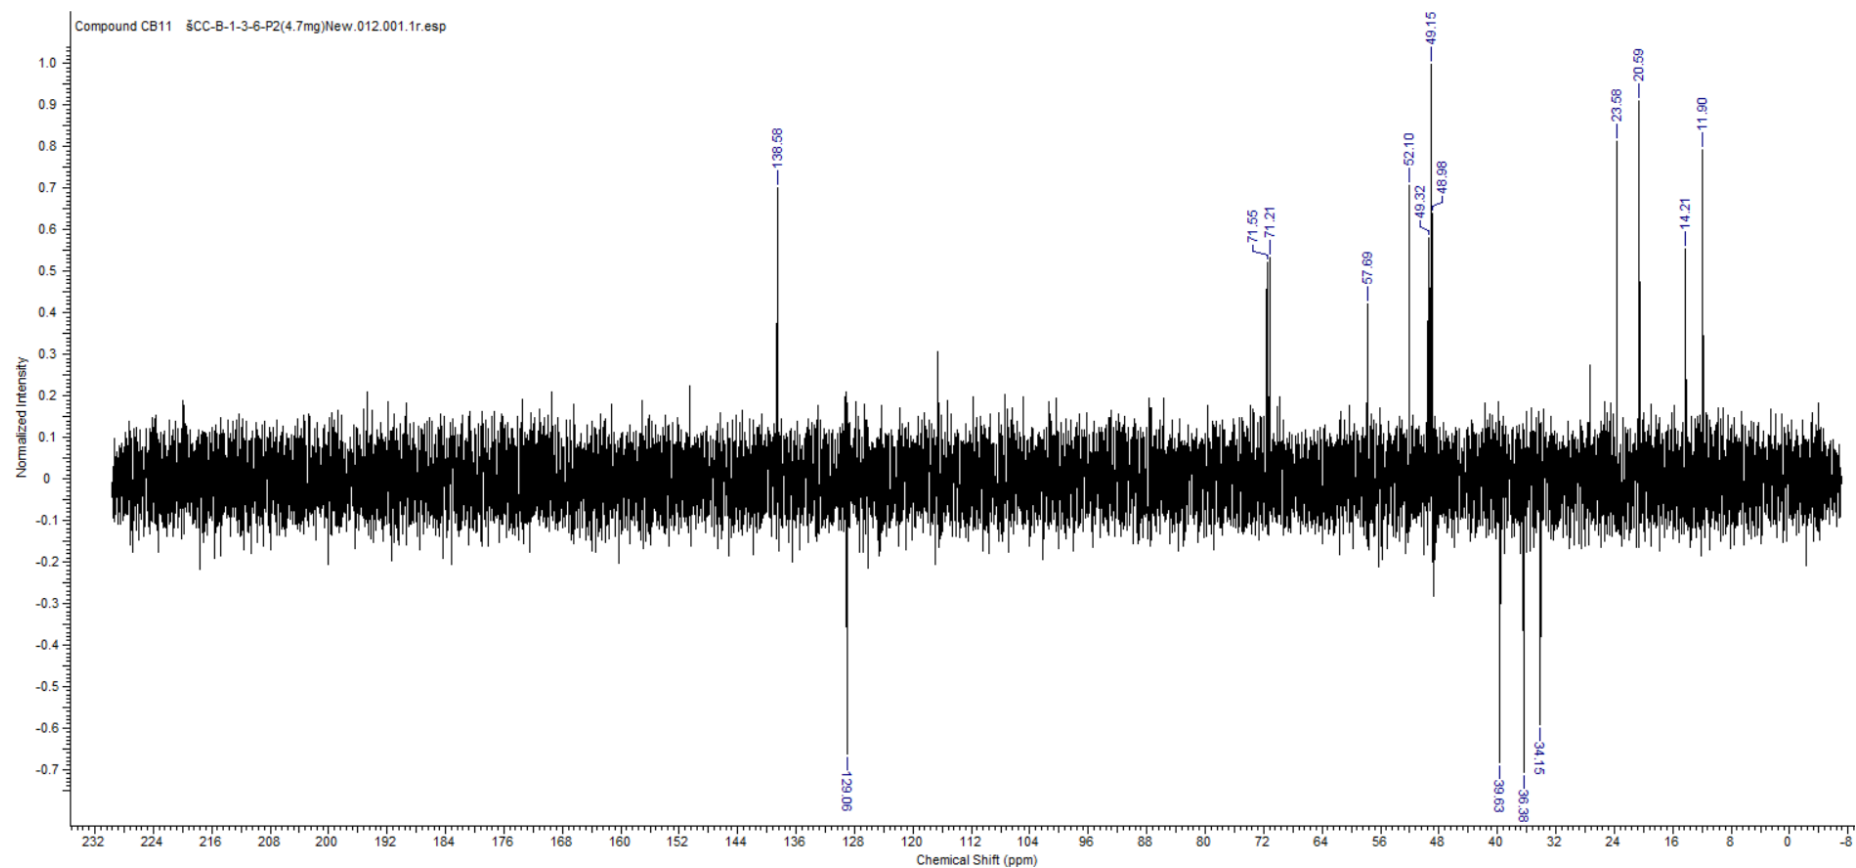

**Figure S23.**  $^{13}\text{C}$  DEPT135 NMR spectrum of **3** in MeOD (125 MHz)

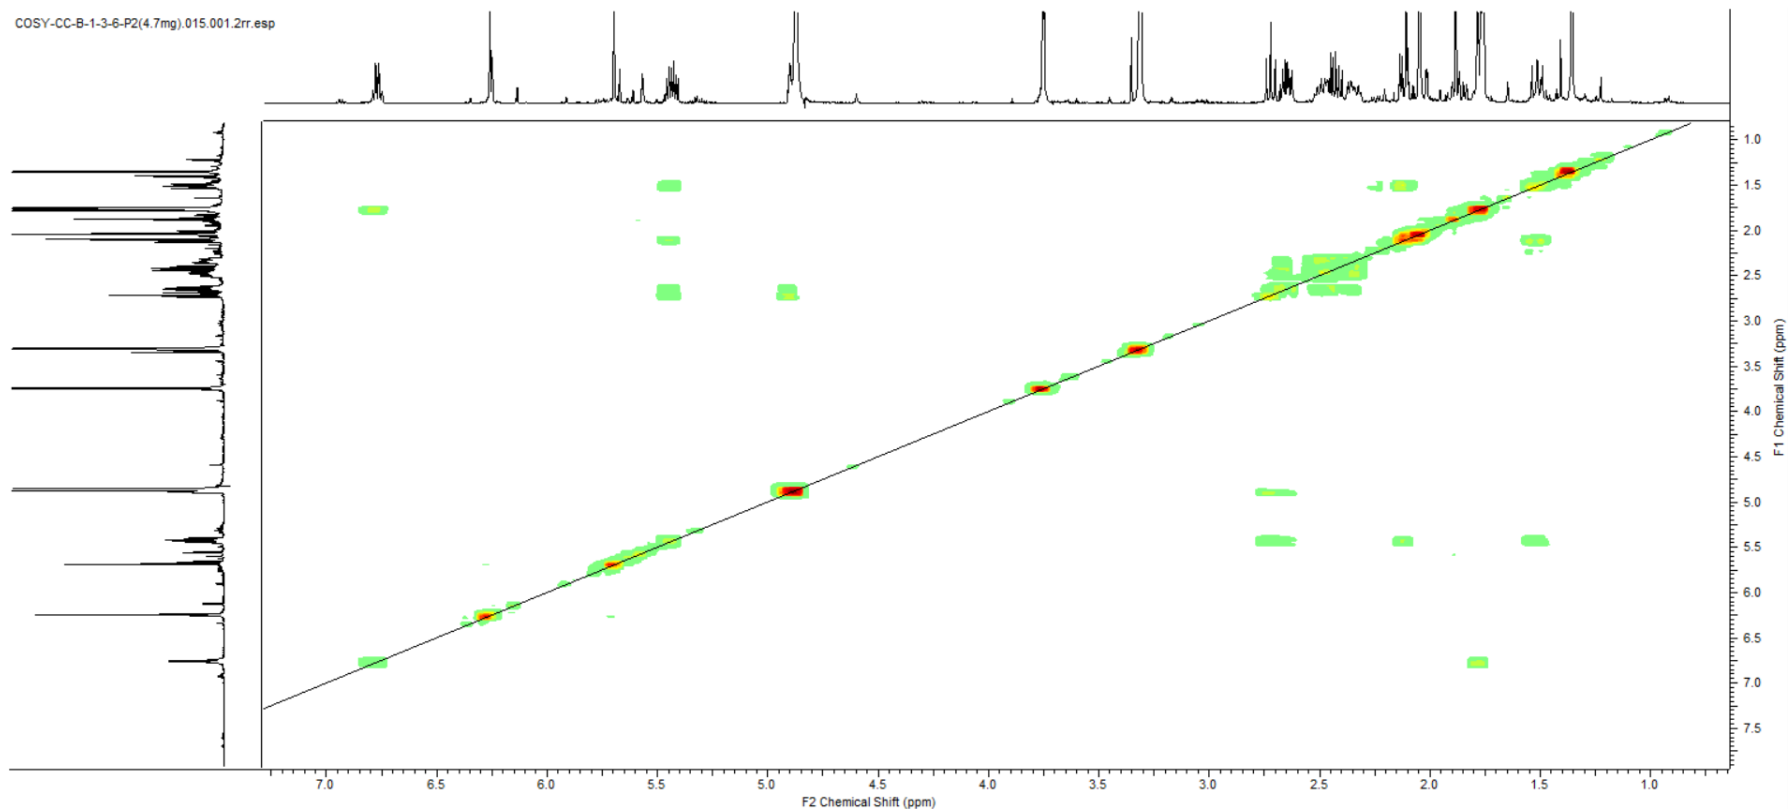

**Figure S24.**  $^1\text{H}$ - $^1\text{H}$  COSY spectrum of **3** in MeOD (500 MHz)

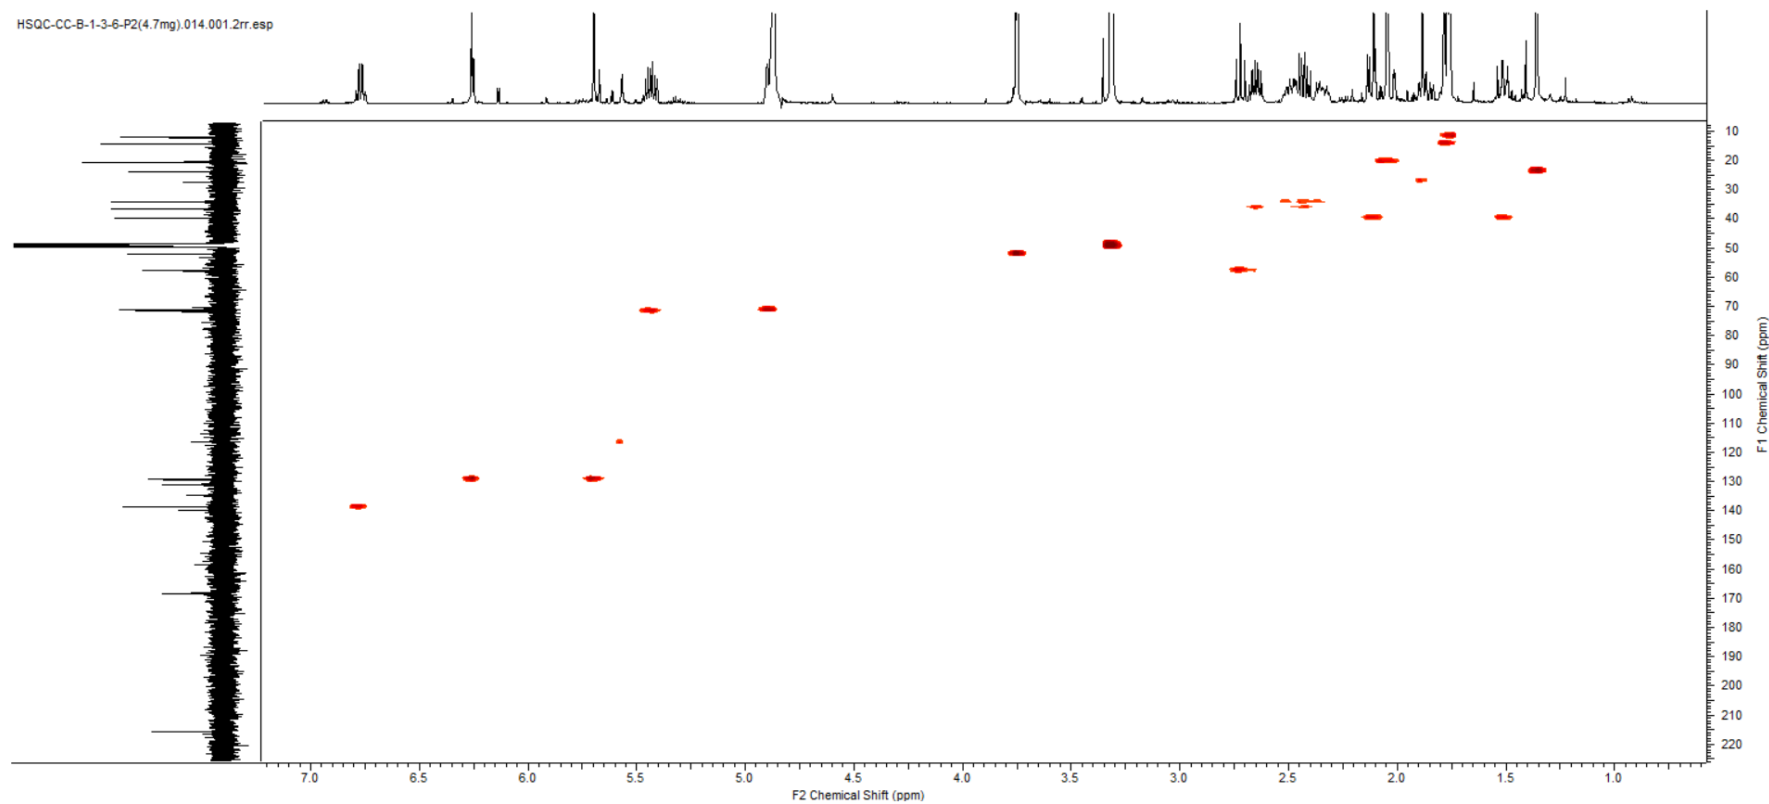

**Figure S25.** HSQC spectrum of **3** in MeOD (500 MHz)



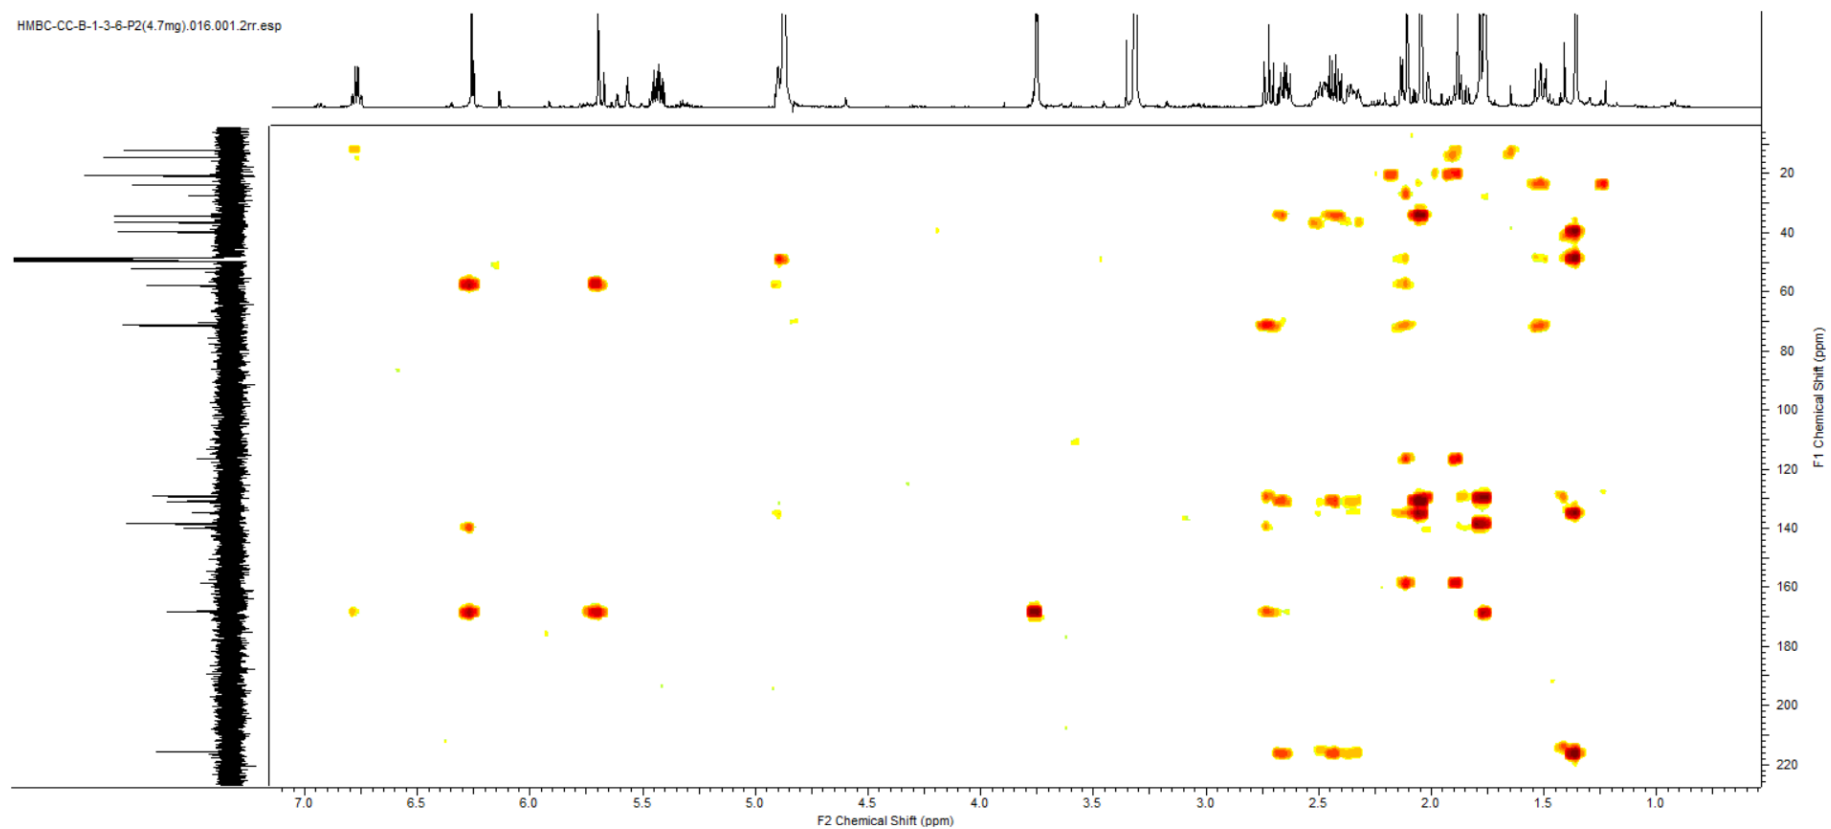

**Figure S26.** HMBC spectrum of **3** in MeOD (500 MHz)

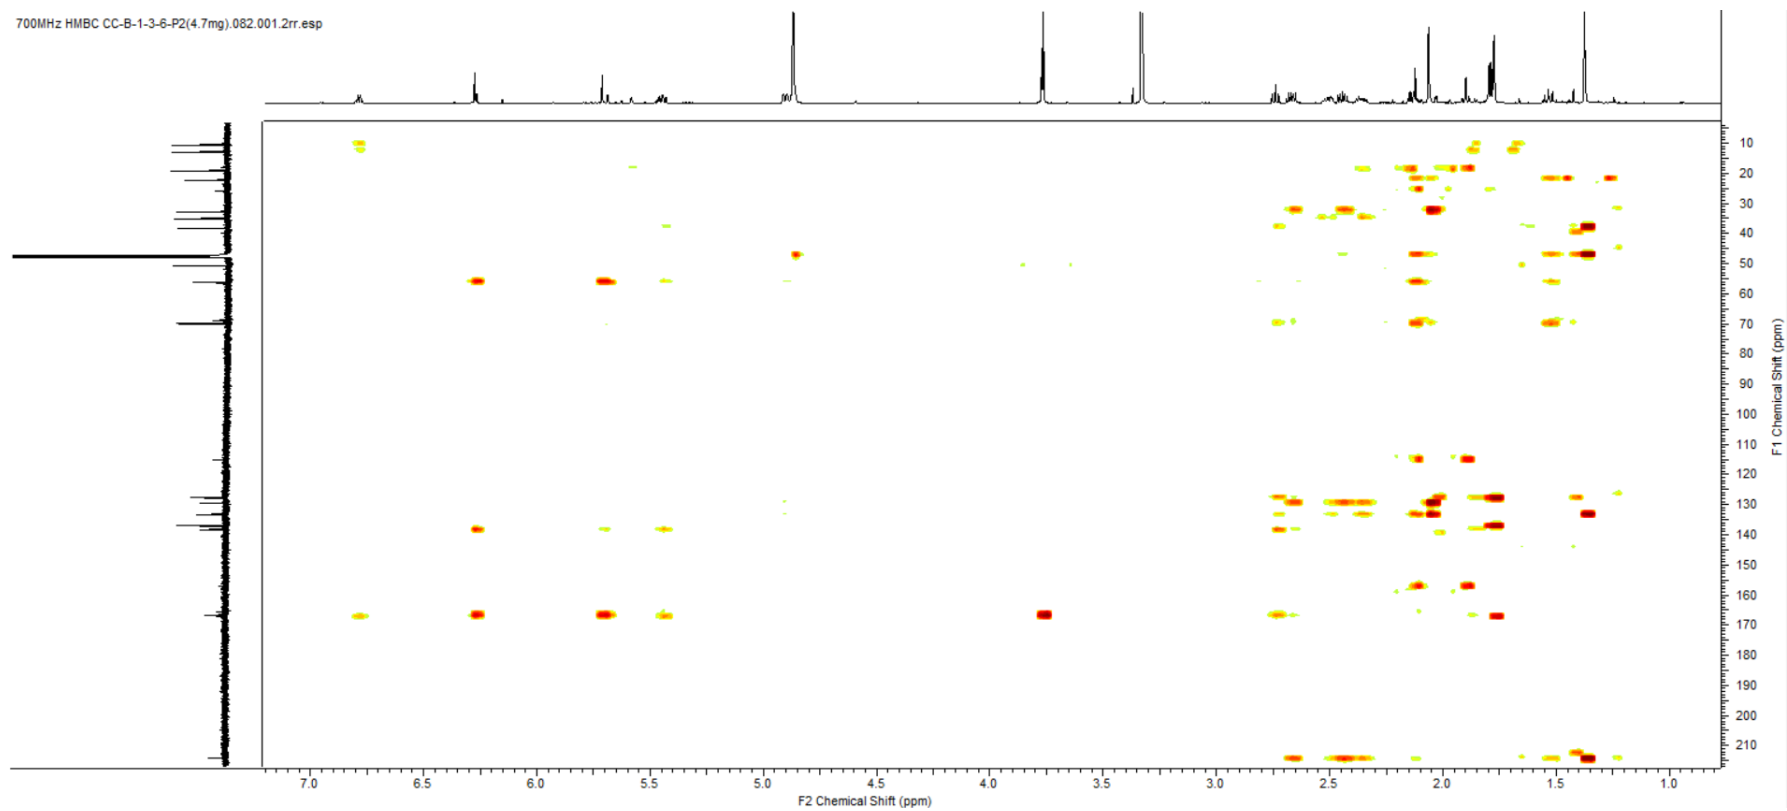

**Figure S27.** HMBC spectrum of **3** in MeOD (700 MHz)

NOESY-CC-B-1-3-6-P2(4.7mg)-NOESY.011.001.2rr.esp

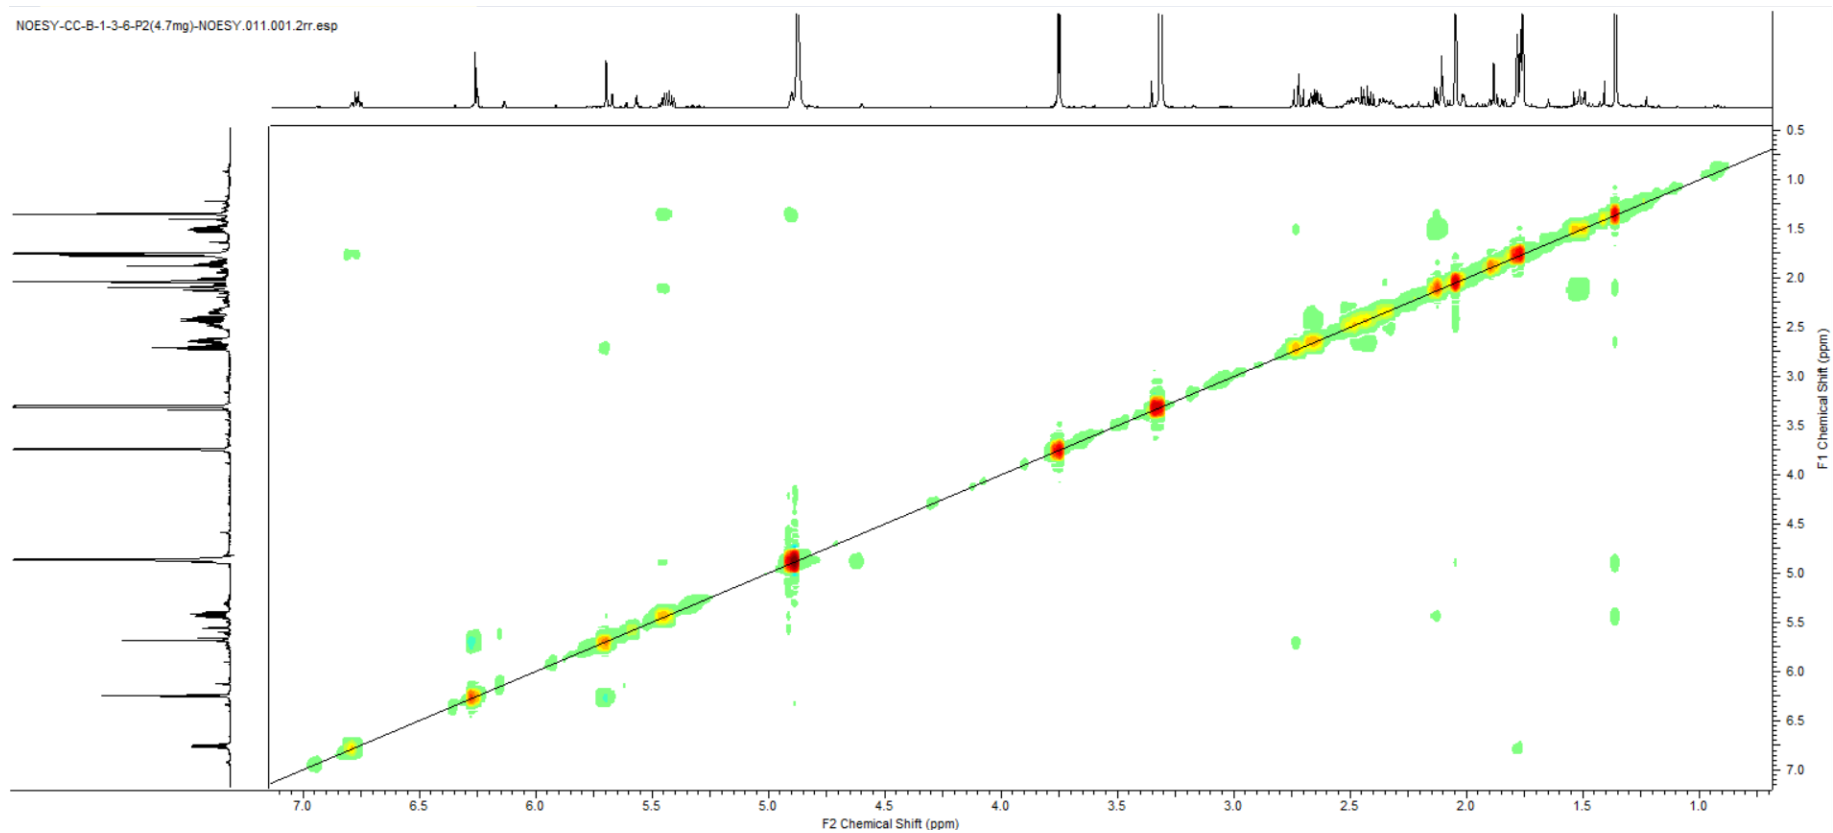

**Figure S28.** PS-NOESY spectrum of **3** in MeOD (500 MHz)

CC-B-1-3-6 P2 + #7 RT: 0.08 AV: 1 NL: 3.12E6  
 F: FTMS + p ESI Full ms [100.00-2000.00]

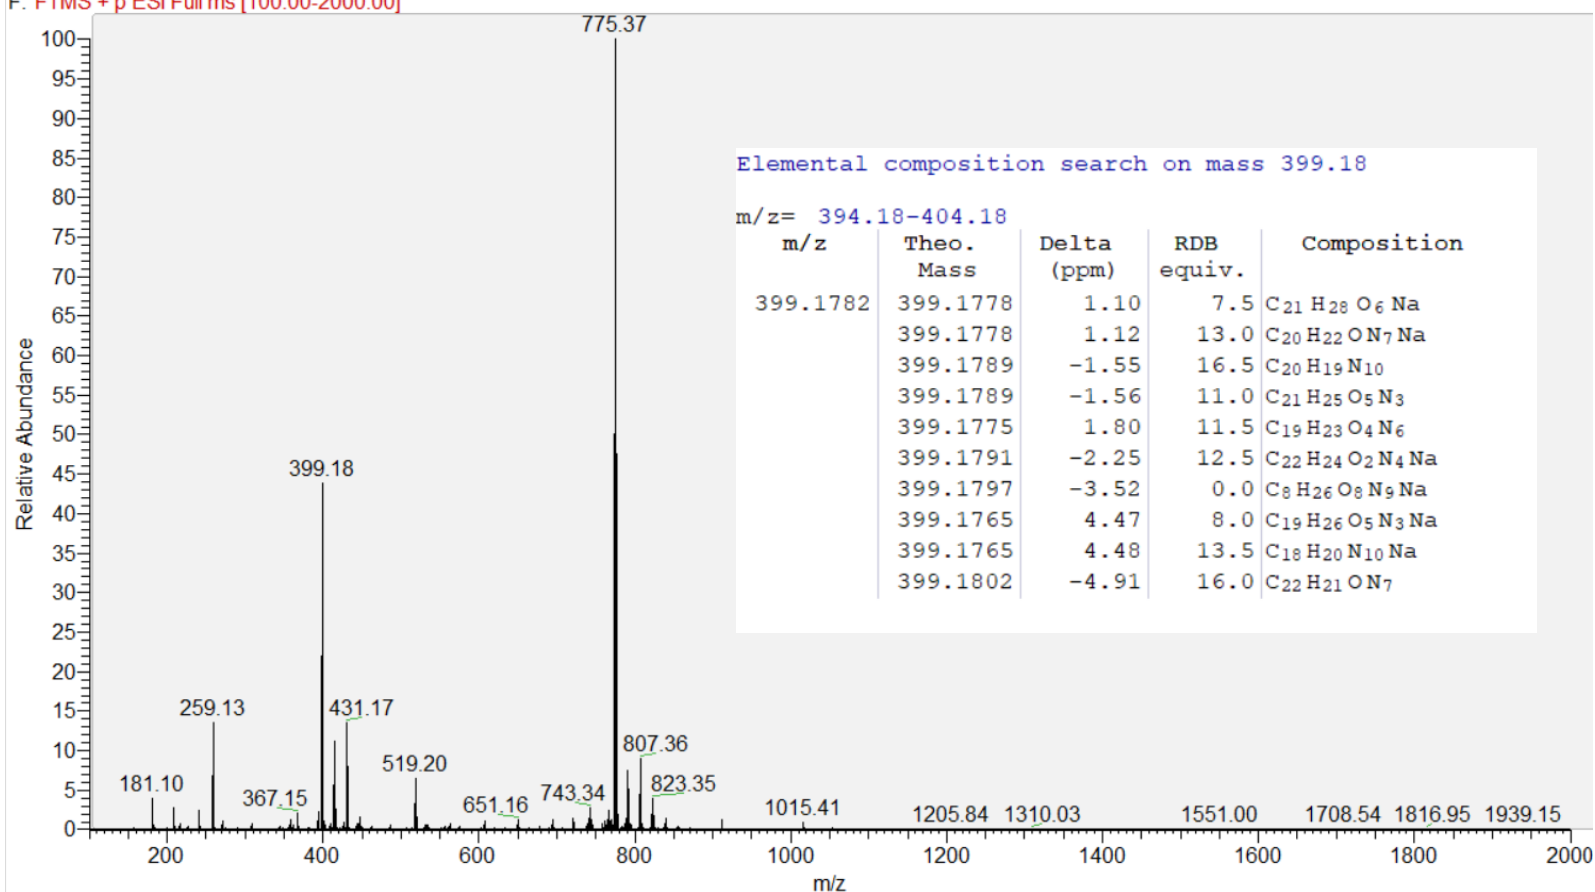

Figure S29. HR-ESI-MS spectrum of **3**

CC-B-1-3-6 P2 + #11 RT: 0.13 AV: 1 NL: 5.25E4  
F: ITMS + c ESI d Full ms2 399.18@cid35.00 [95.00-410.00]

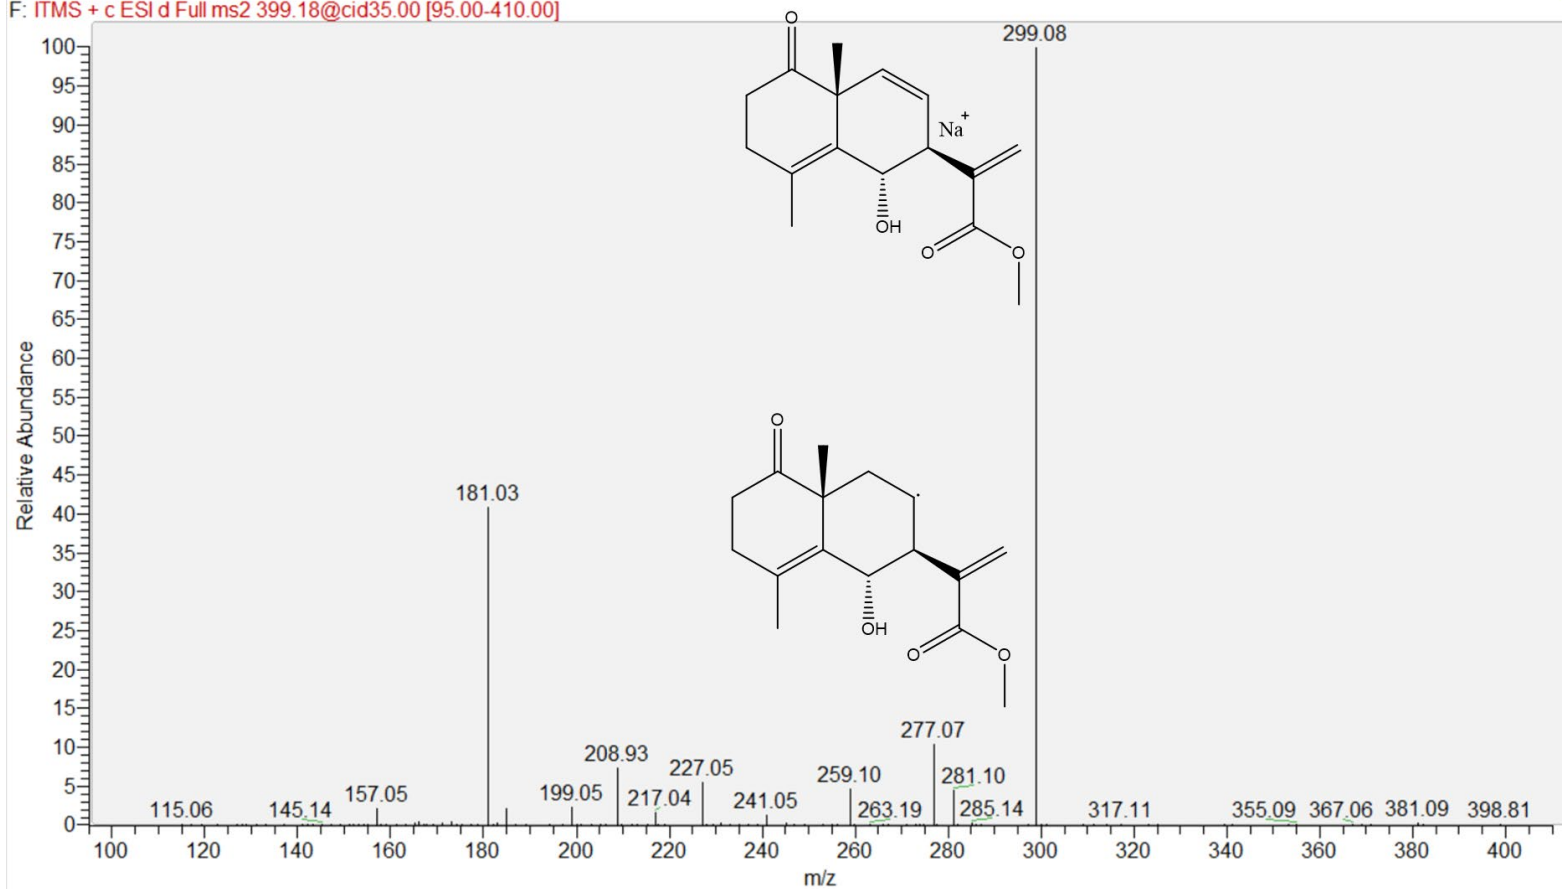

Figure S30. ESI-MS/MS spectrum of 3

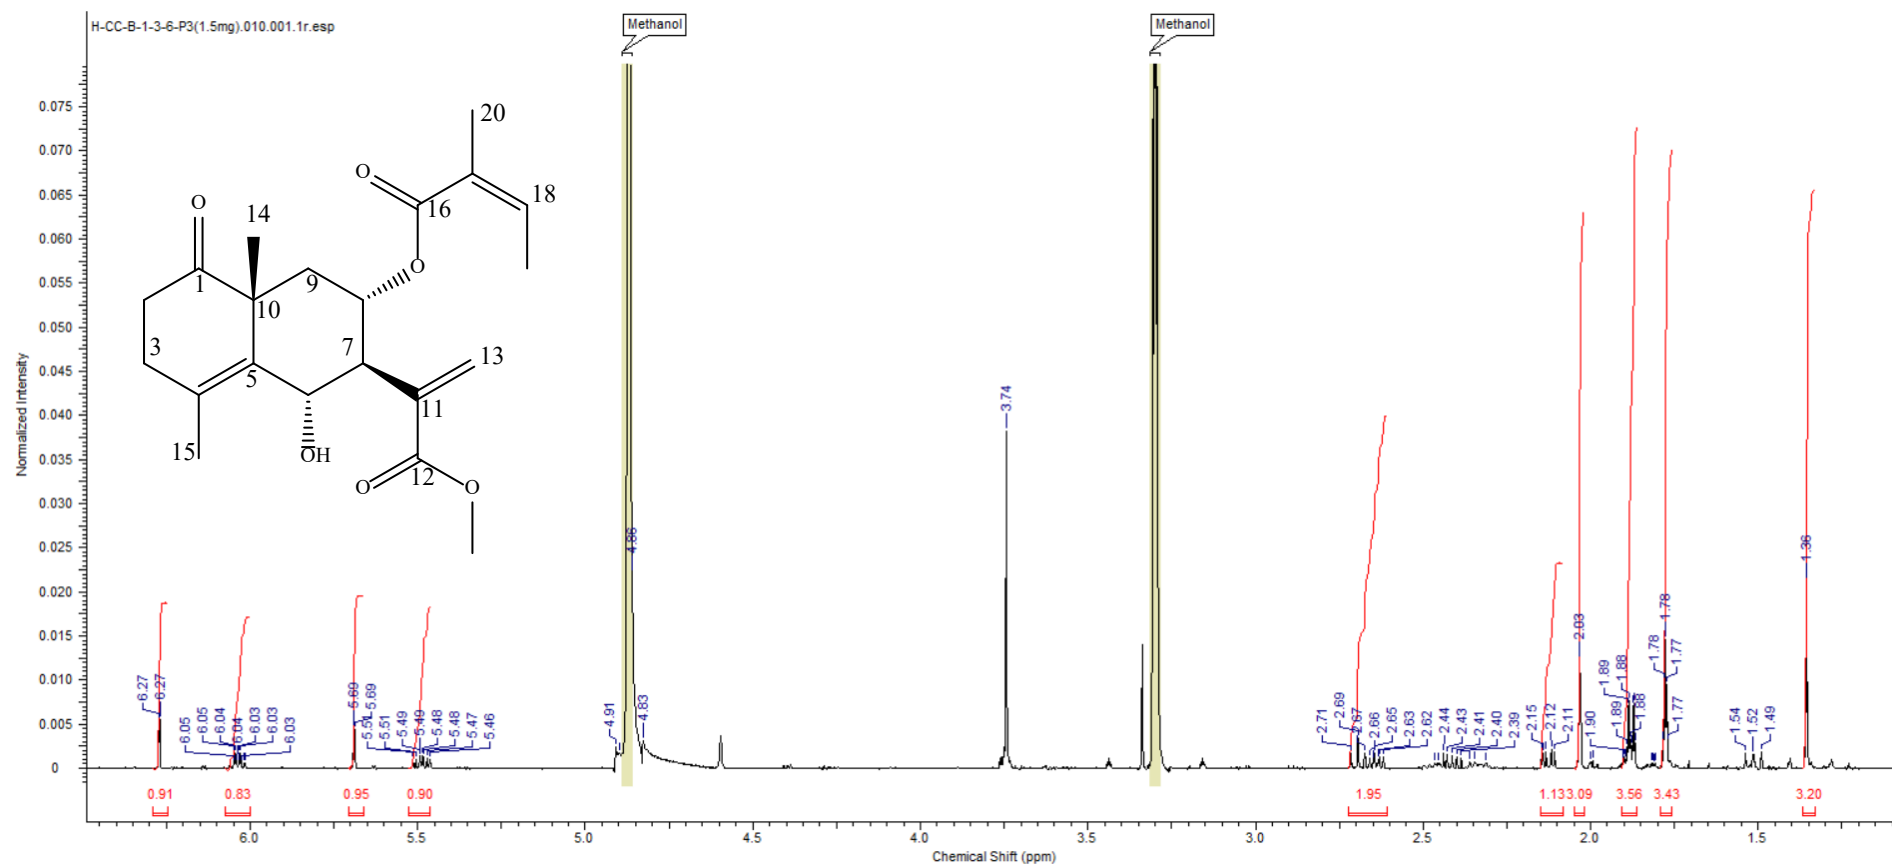

Figure S31.  $^1\text{H}$ -NMR spectrum of 4 in MeOD (500 MHz)

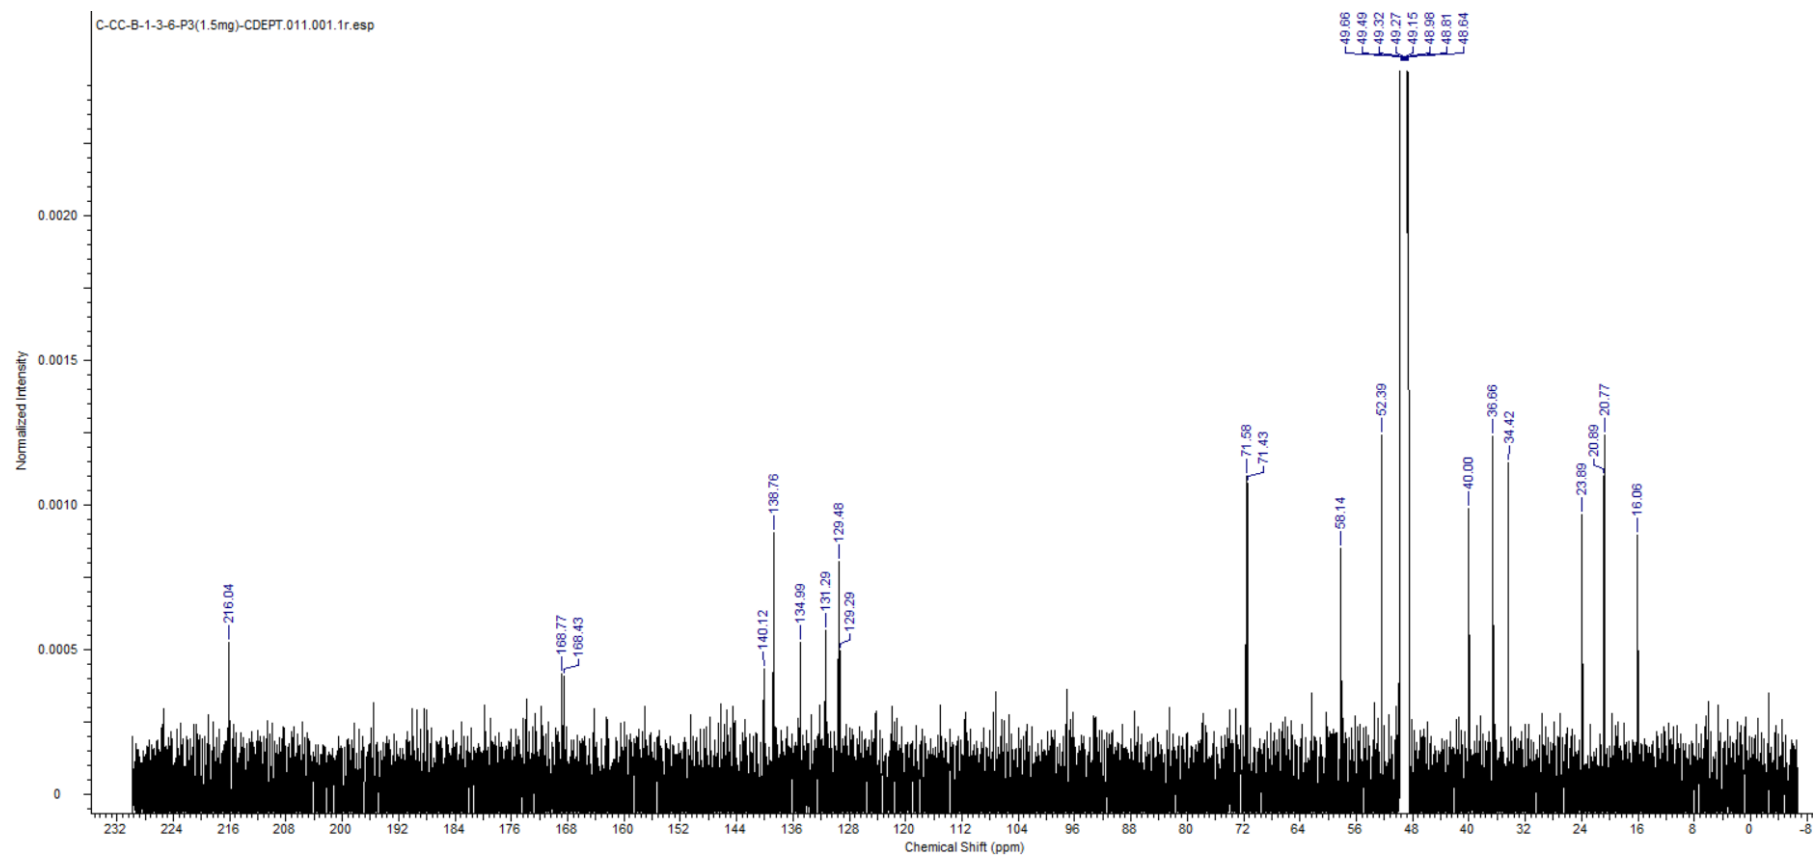

**Figure S32.**  $^{13}\text{C}$ -NMR spectrum of **4** in MeOD (125 MHz)

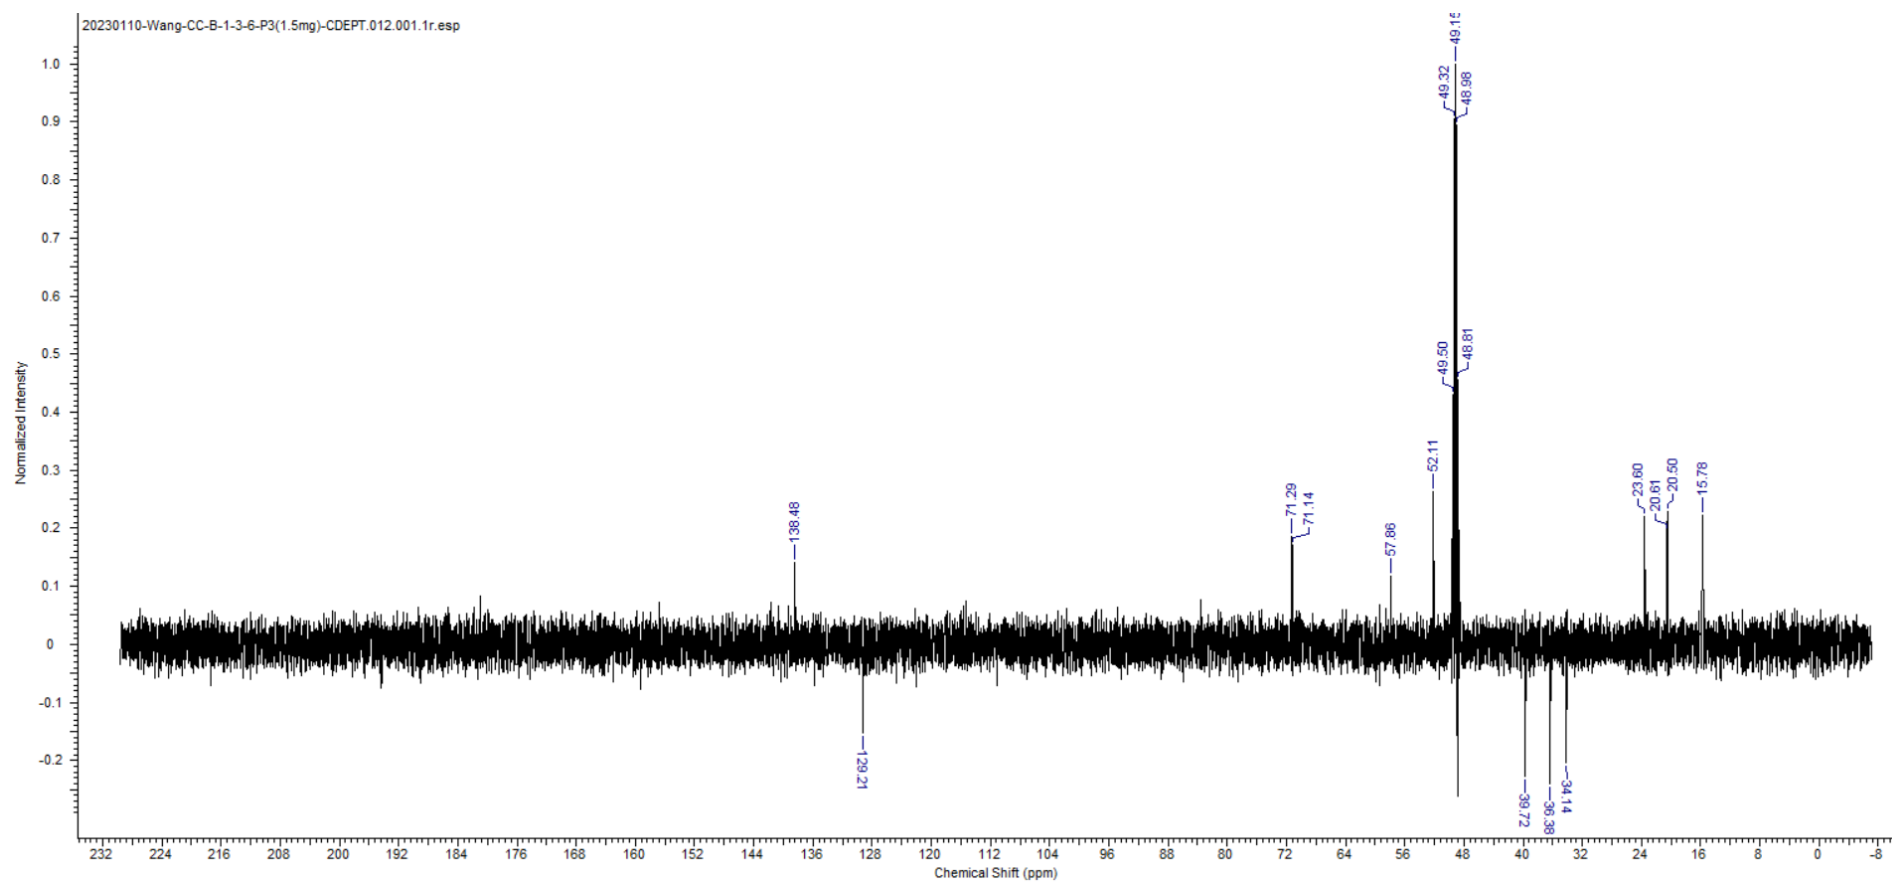

**Figure S33.**  $^{13}\text{C}$  DEPT135 NMR spectrum of **4** in MeOD (125 MHz)



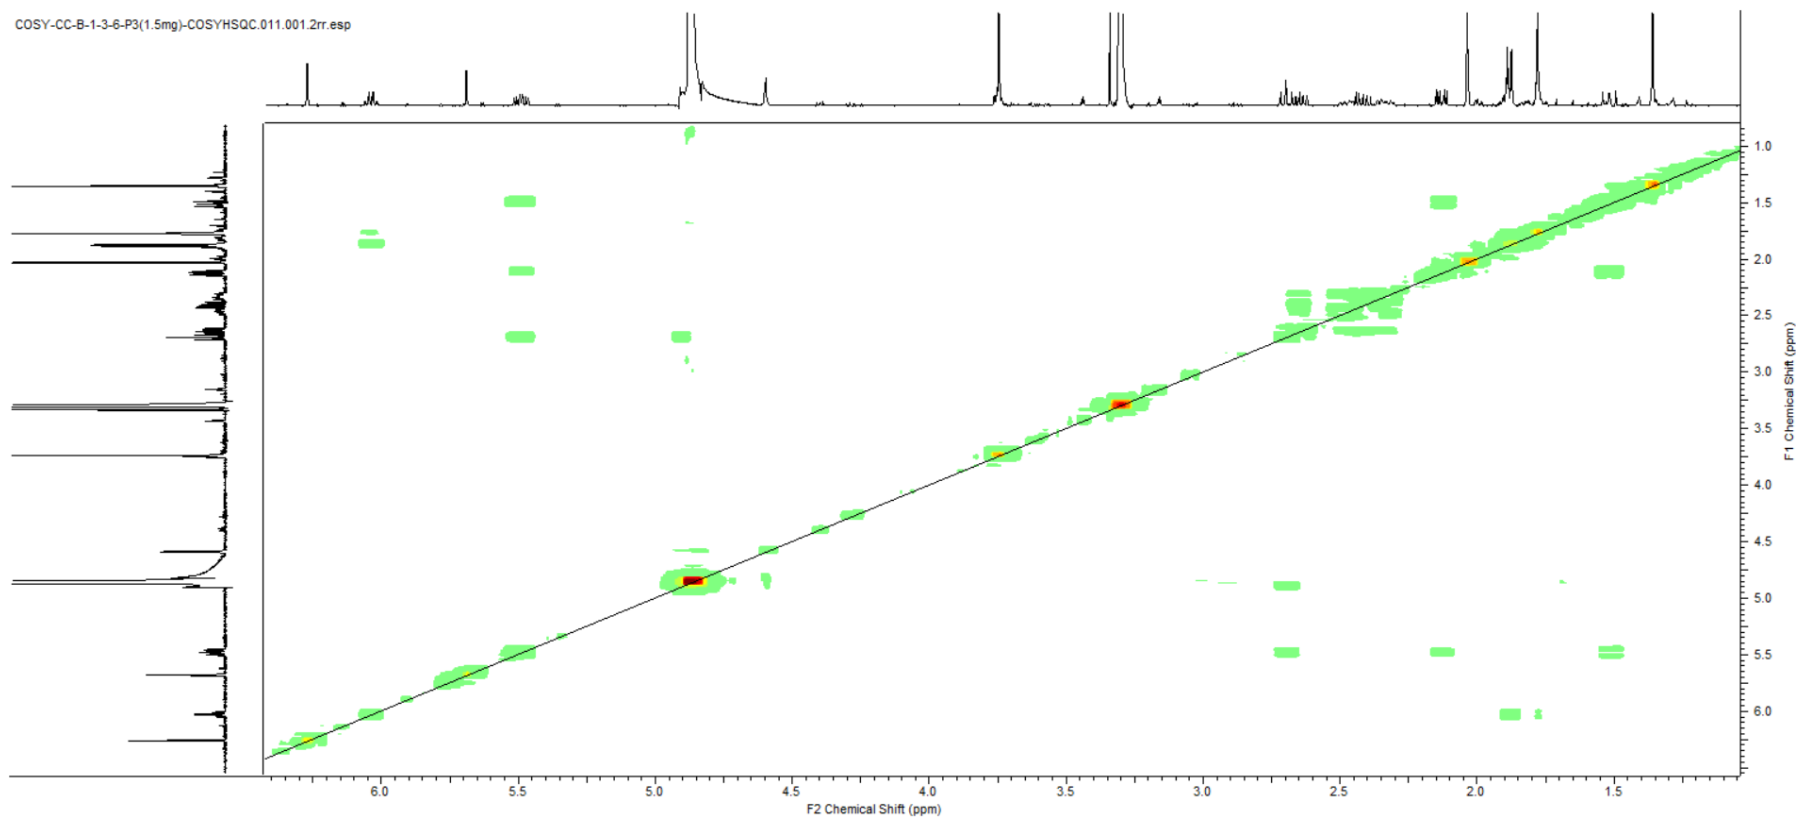

**Figure S34.** <sup>1</sup>H-<sup>1</sup>H COSY spectrum of **4** in MeOD (500 MHz)

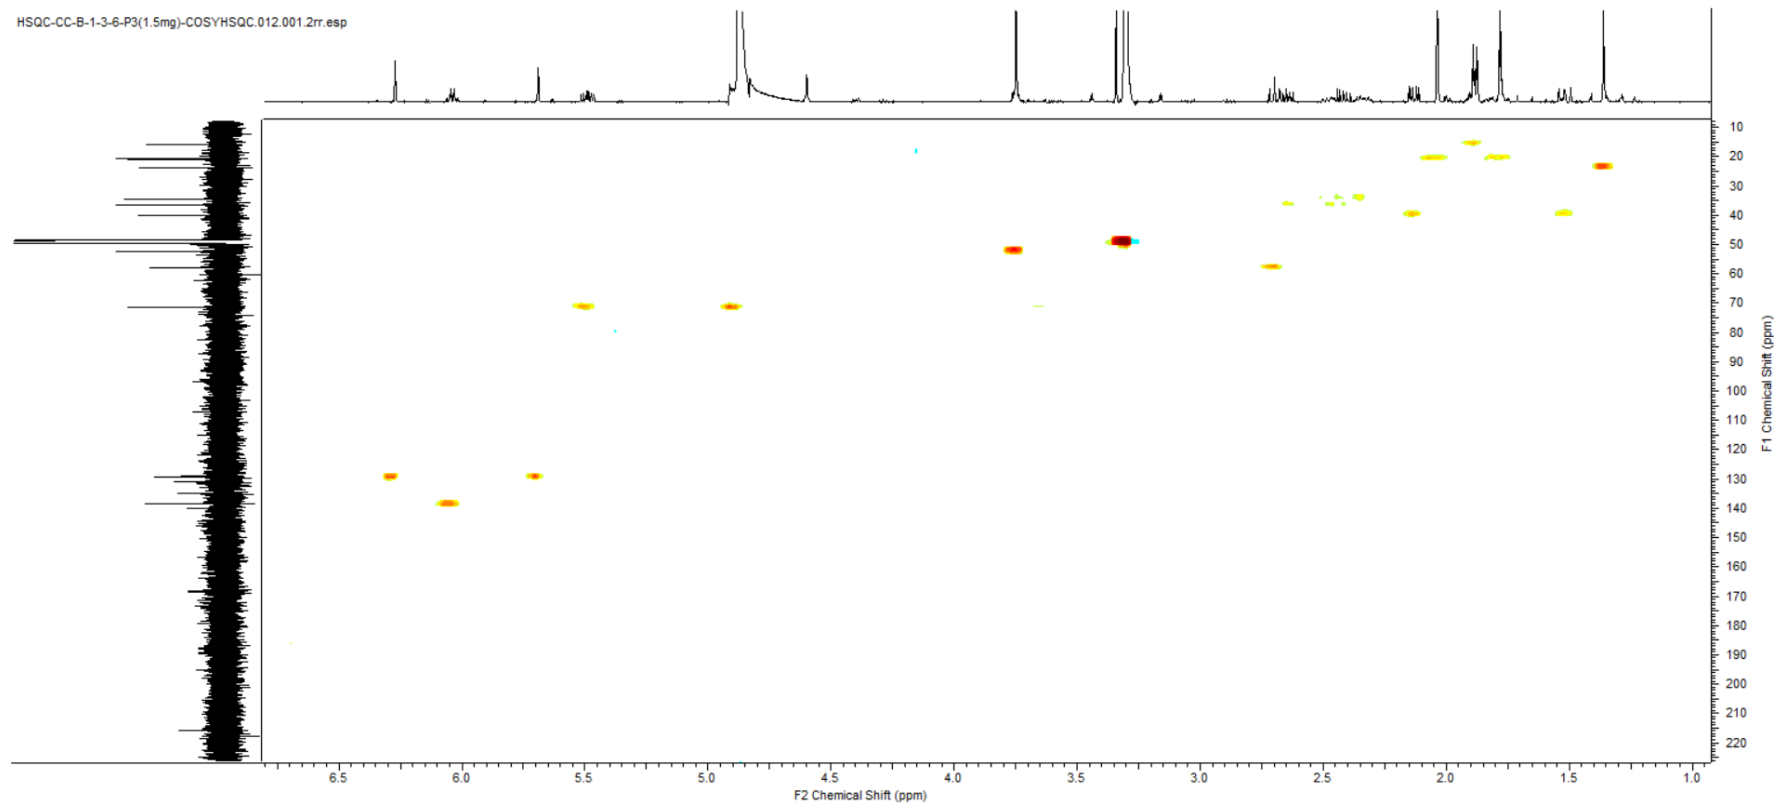

**Figure S35.** HSQC spectrum of **4** in MeOD (500 MHz)

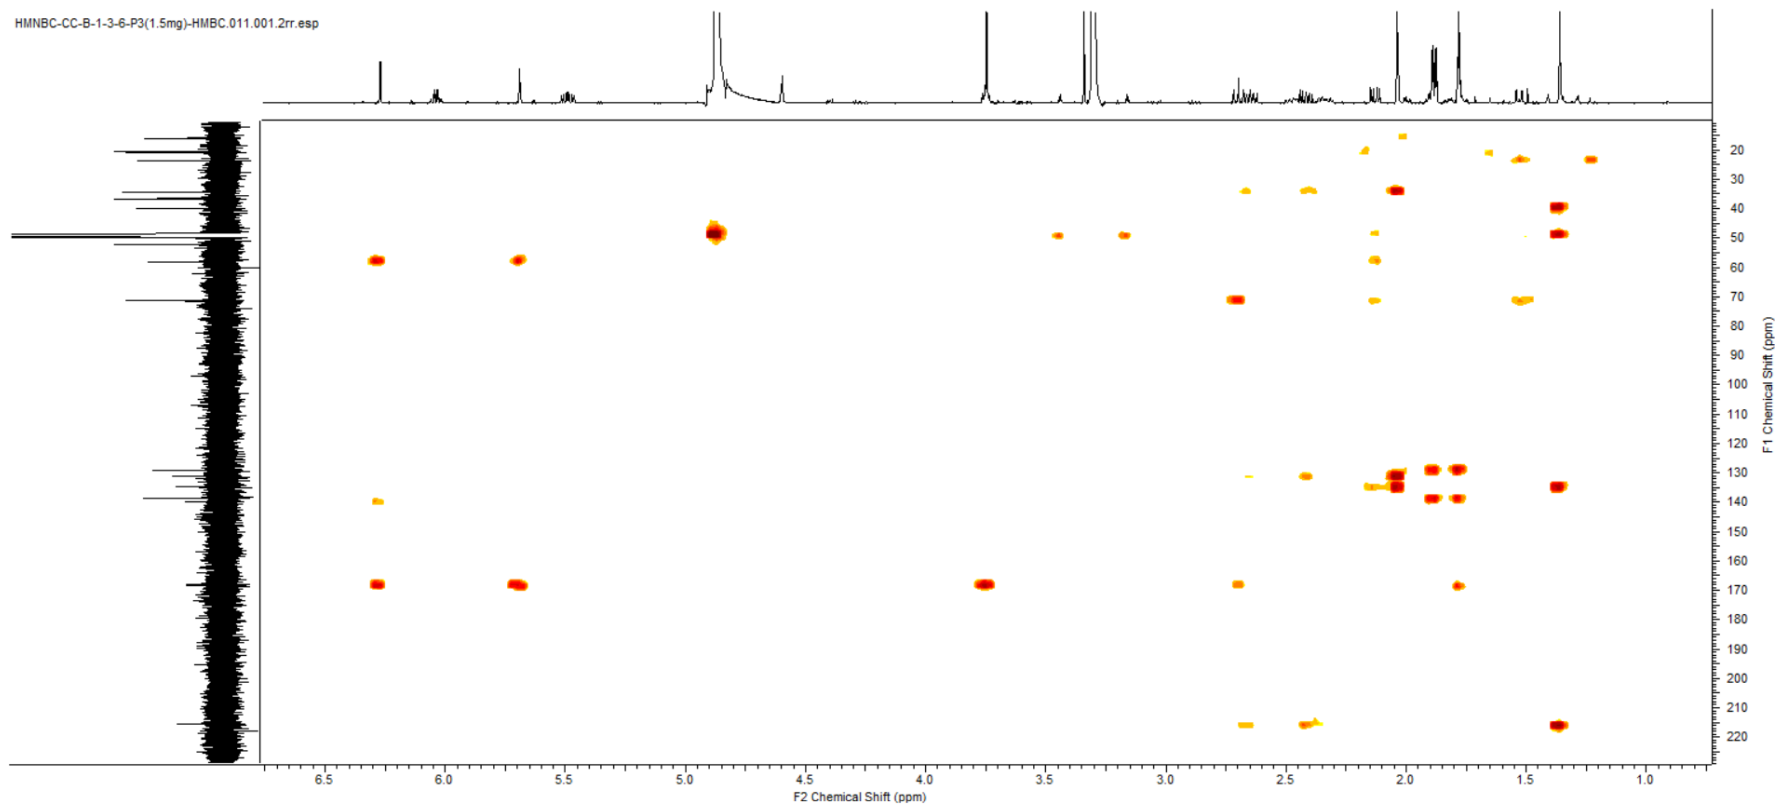

**Figure S36.** HMBC spectrum of **4** in MeOD (500 MHz)

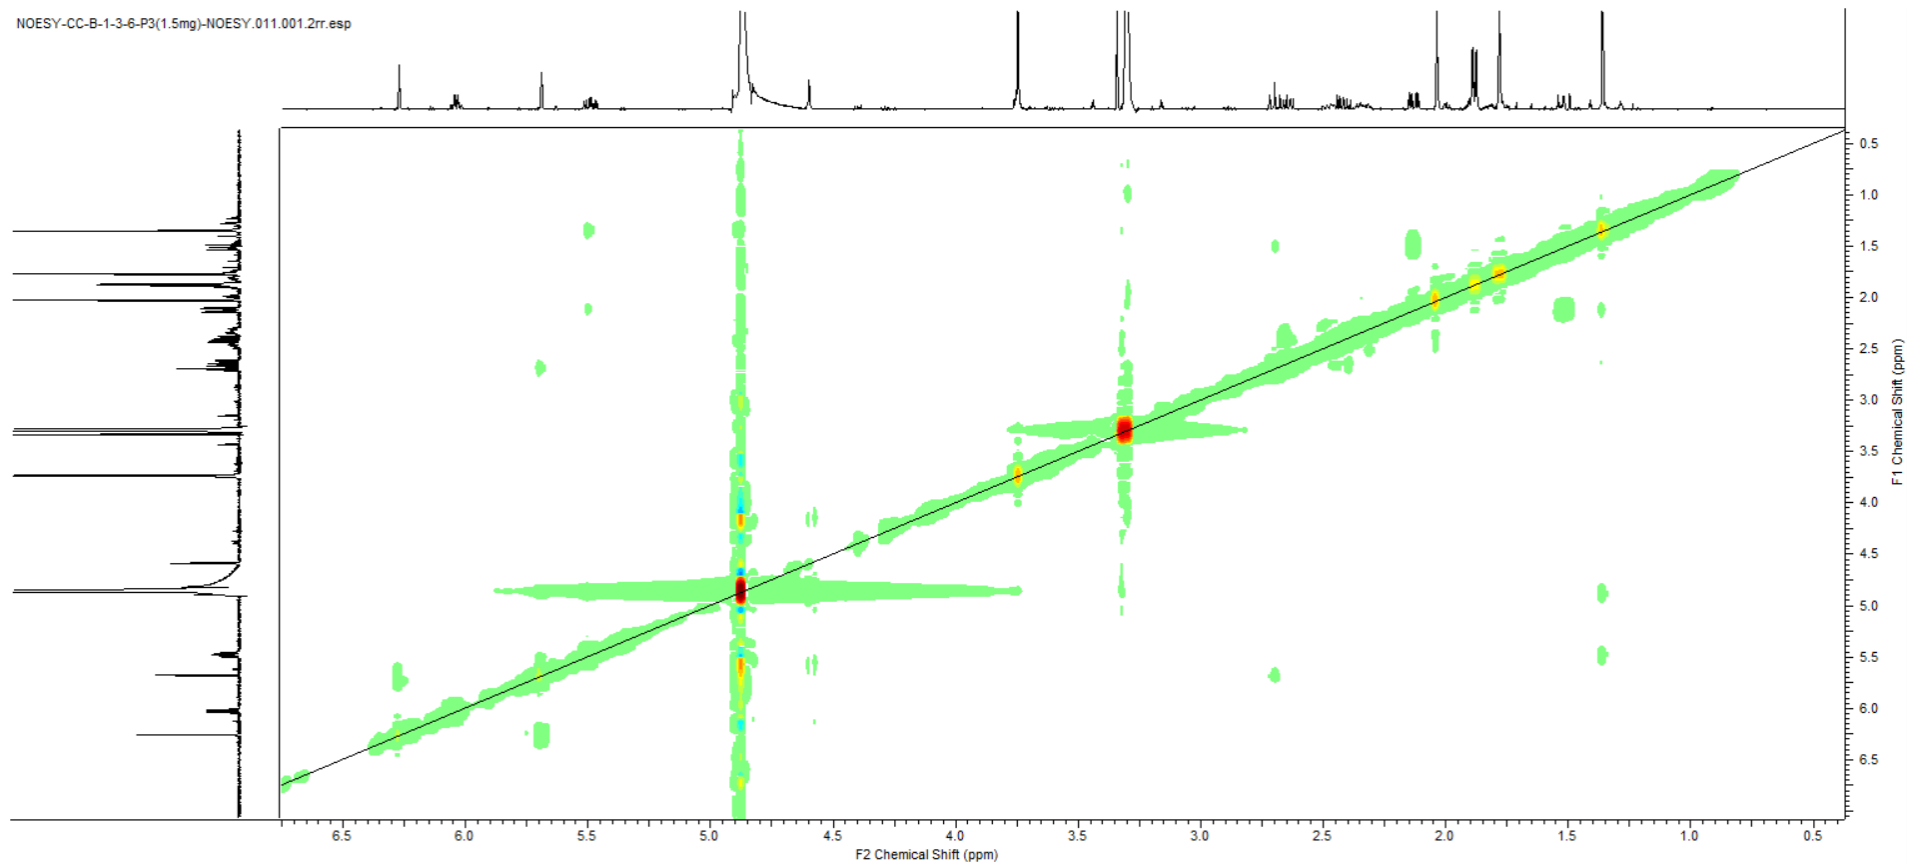

**Figure S37.** PS-NOESY spectrum of **4** in MeOD (500 MHz)

CC-B-1-3-6 P3 + #7 RT: 0.08 AV: 1 NL: 1.82E6  
F: FTMS + p ESI Full ms [100.00-2000.00]

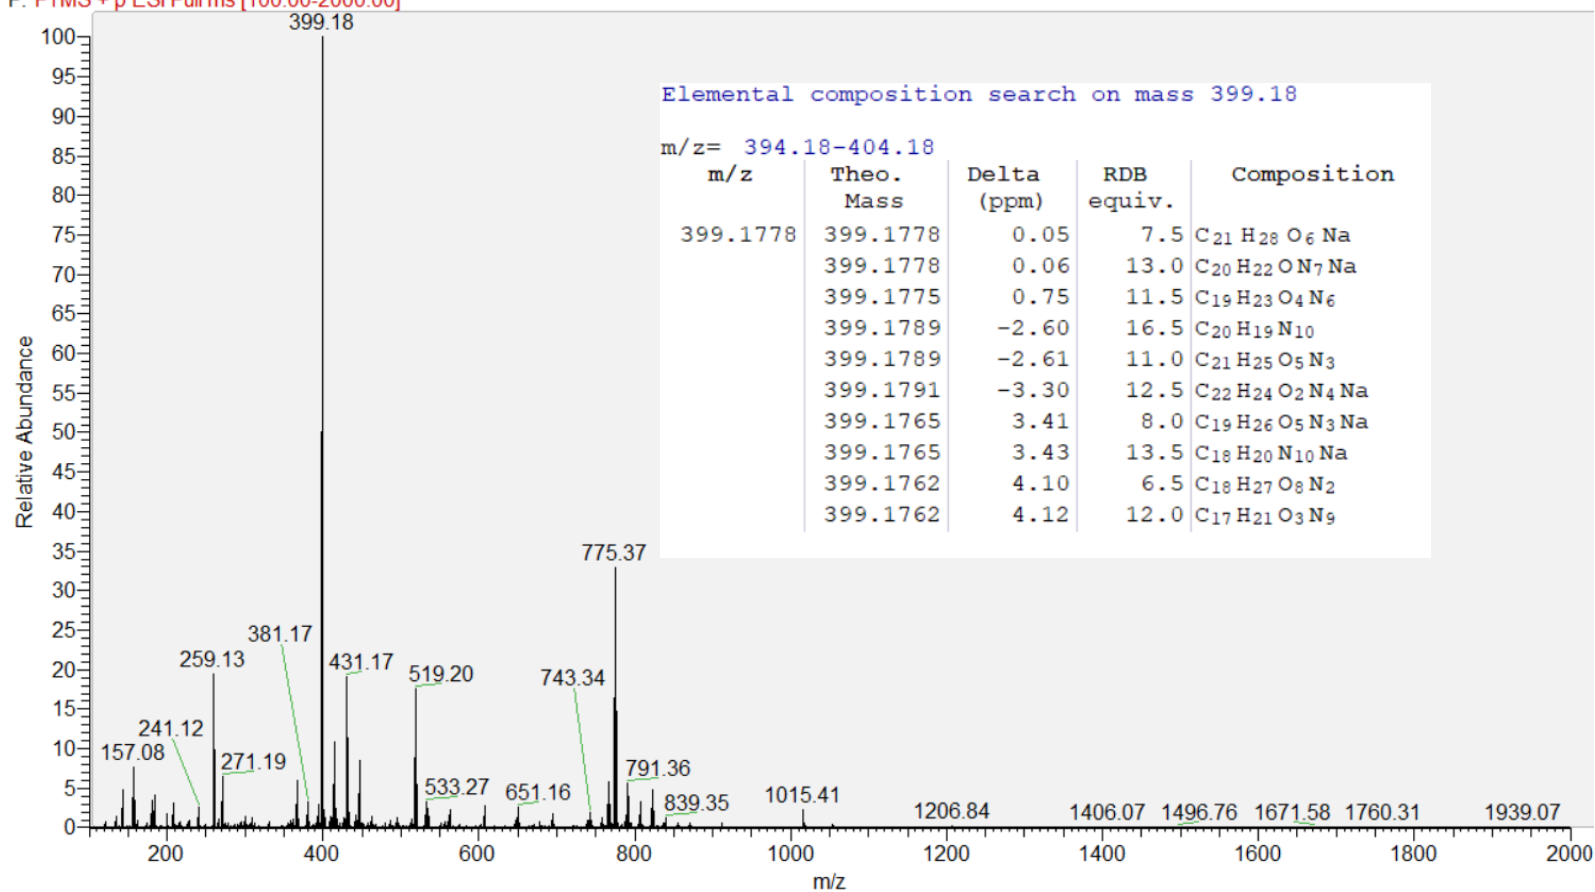

Figure S38. HR-ESI-MS spectrum of 4

CC-B-1-3-6 P3 + #8 RT: 0.09 AV: 1 NL: 2.52E4  
F: ITMS + c ESI d Full ms2 399.18@cid35.00 [95.00-410.00]

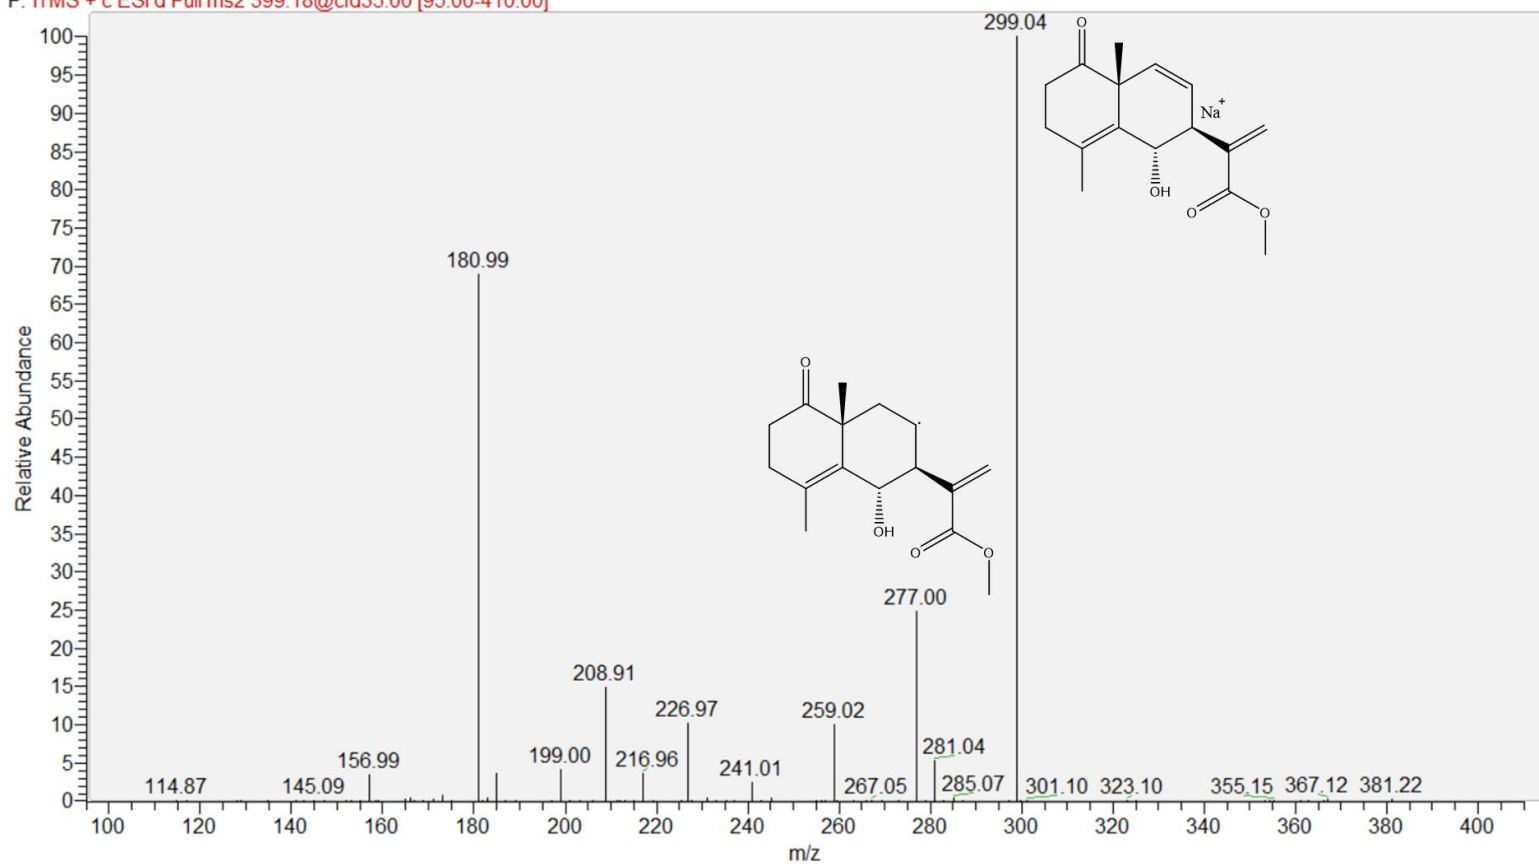

Figure S39. ESI-MS/MS spectrum of 4

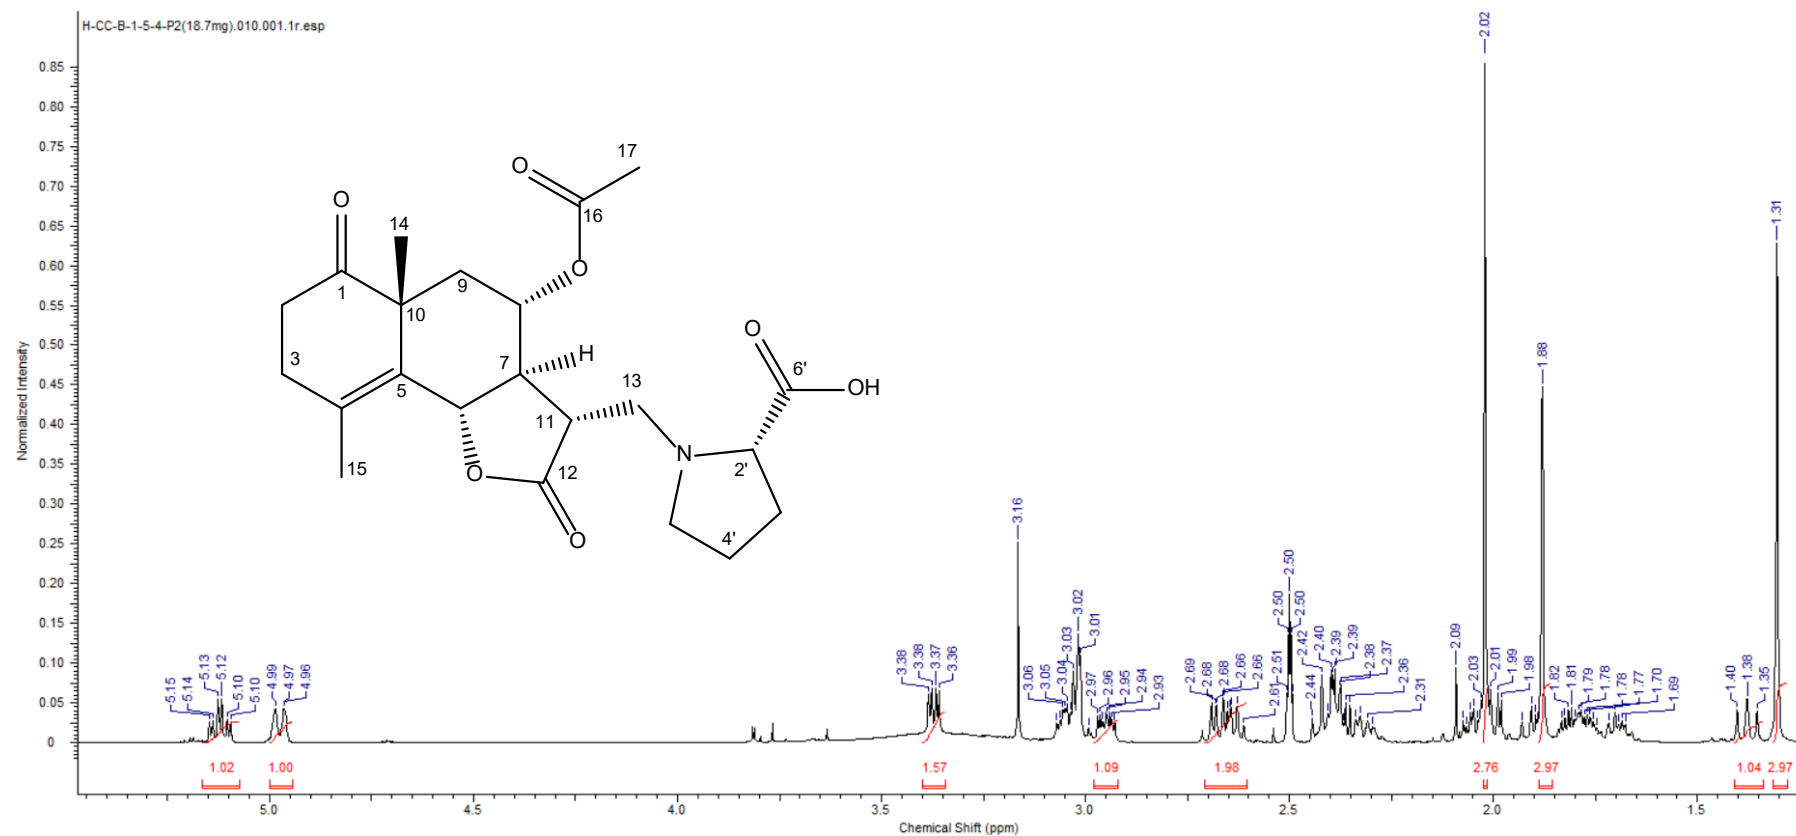

Figure S40.  $^1\text{H}$ -NMR spectrum of **5** in  $\text{DMSO}-d_6$  (500 MHz)

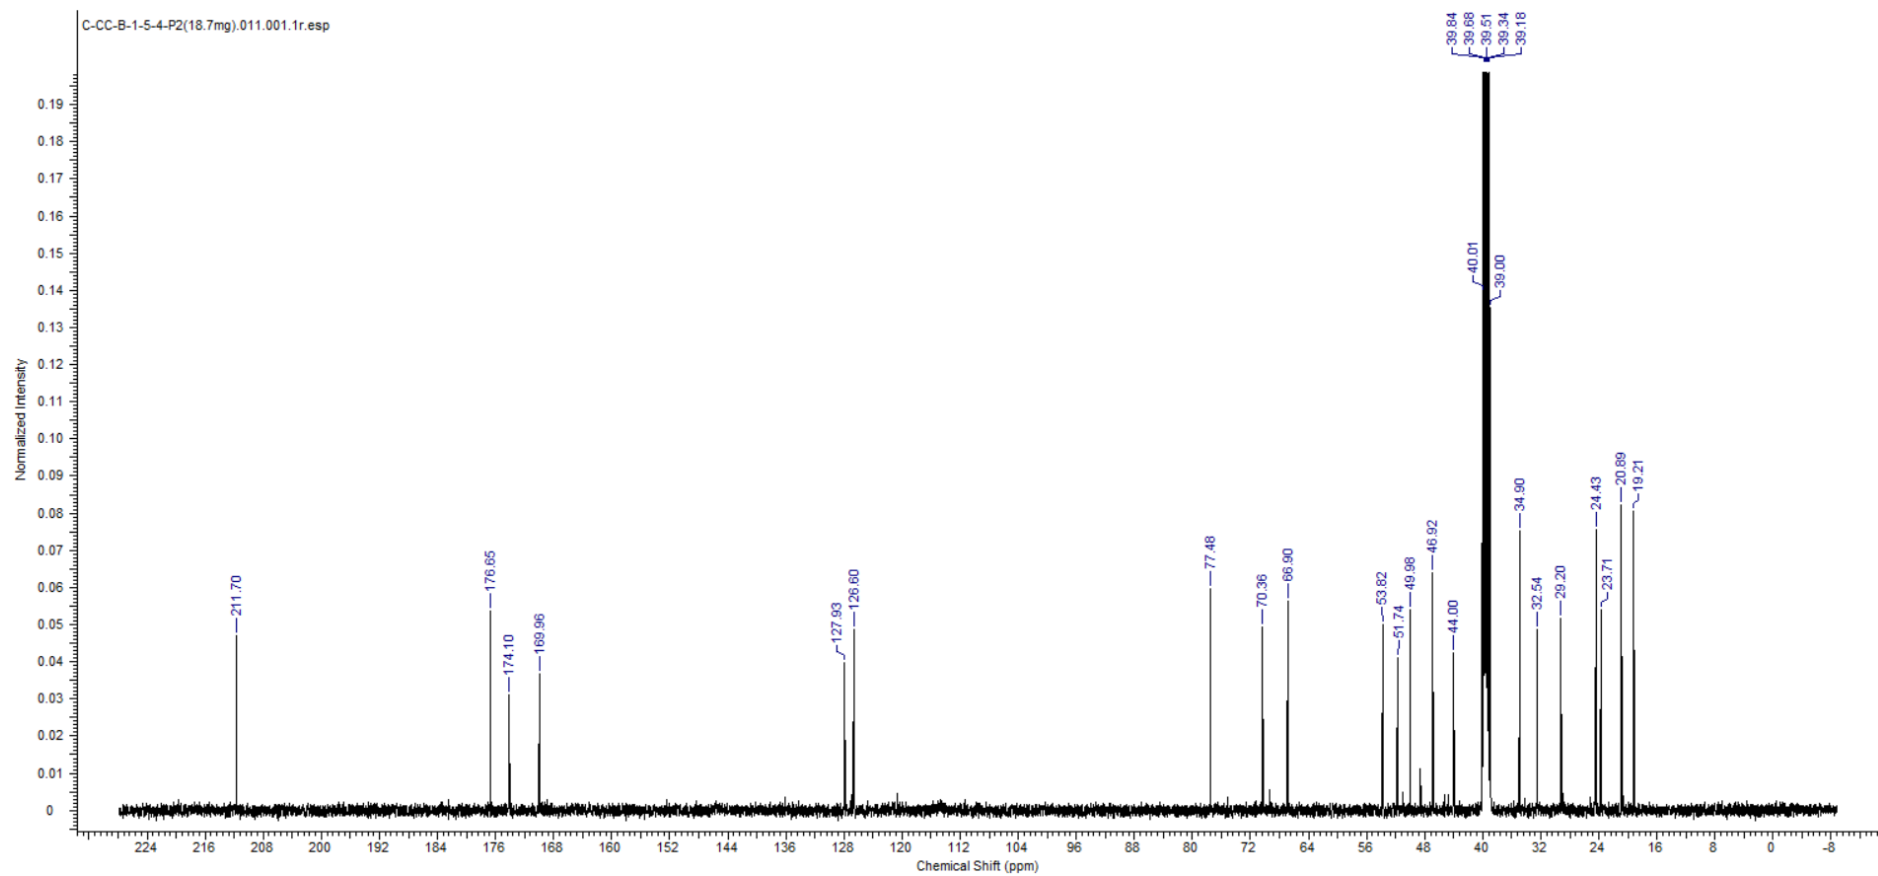

Figure S41.  $^{13}\text{C}$ -NMR spectrum of **5** in  $\text{DMSO-}d_6$  (125 MHz)



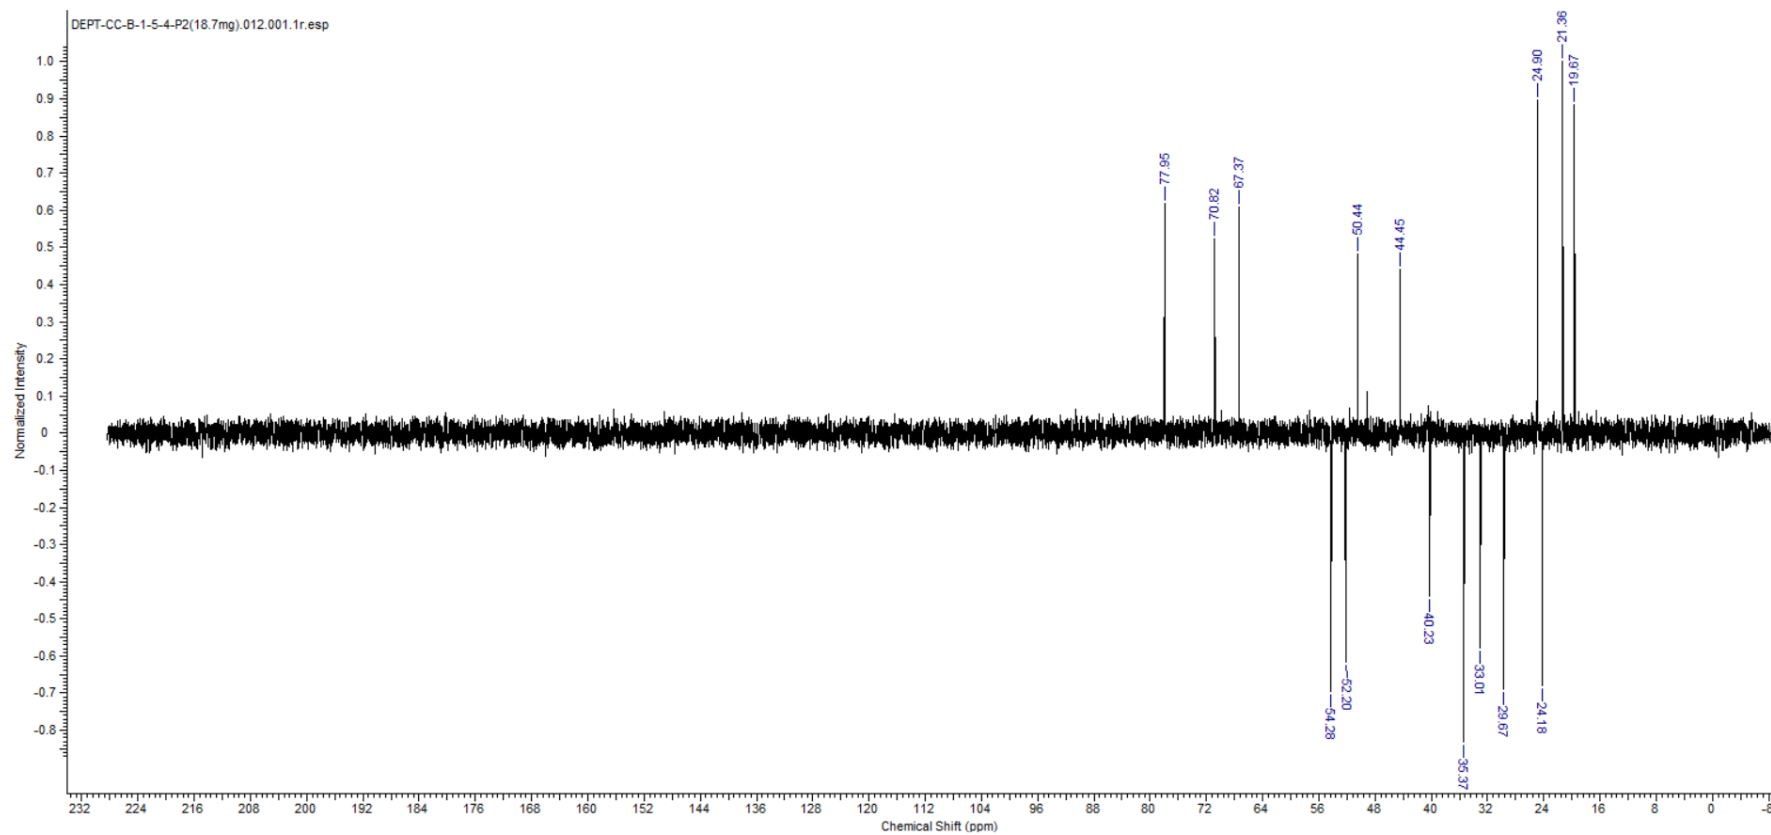

**Figure S42.**  $^{13}\text{C}$  DEPT135 NMR spectrum of **5** in  $\text{DMSO}-d_6$  (125 MHz)

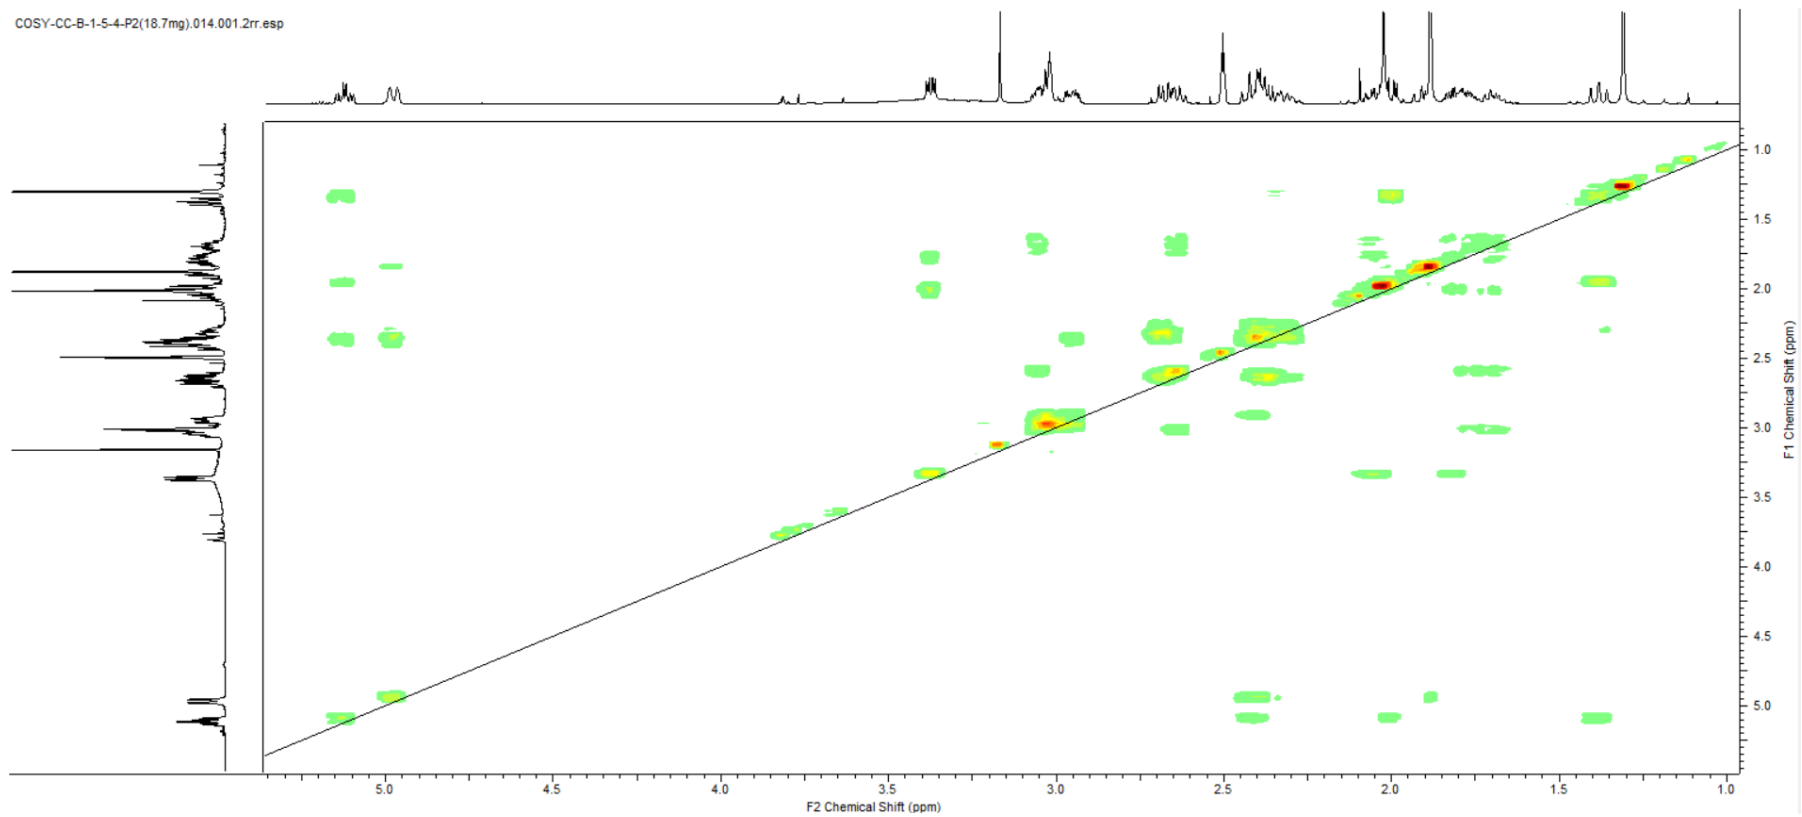

**Figure S43.**  $^1\text{H}$ - $^1\text{H}$  COSY spectrum of **5** in  $\text{DMSO}-d_6$  (500 MHz)

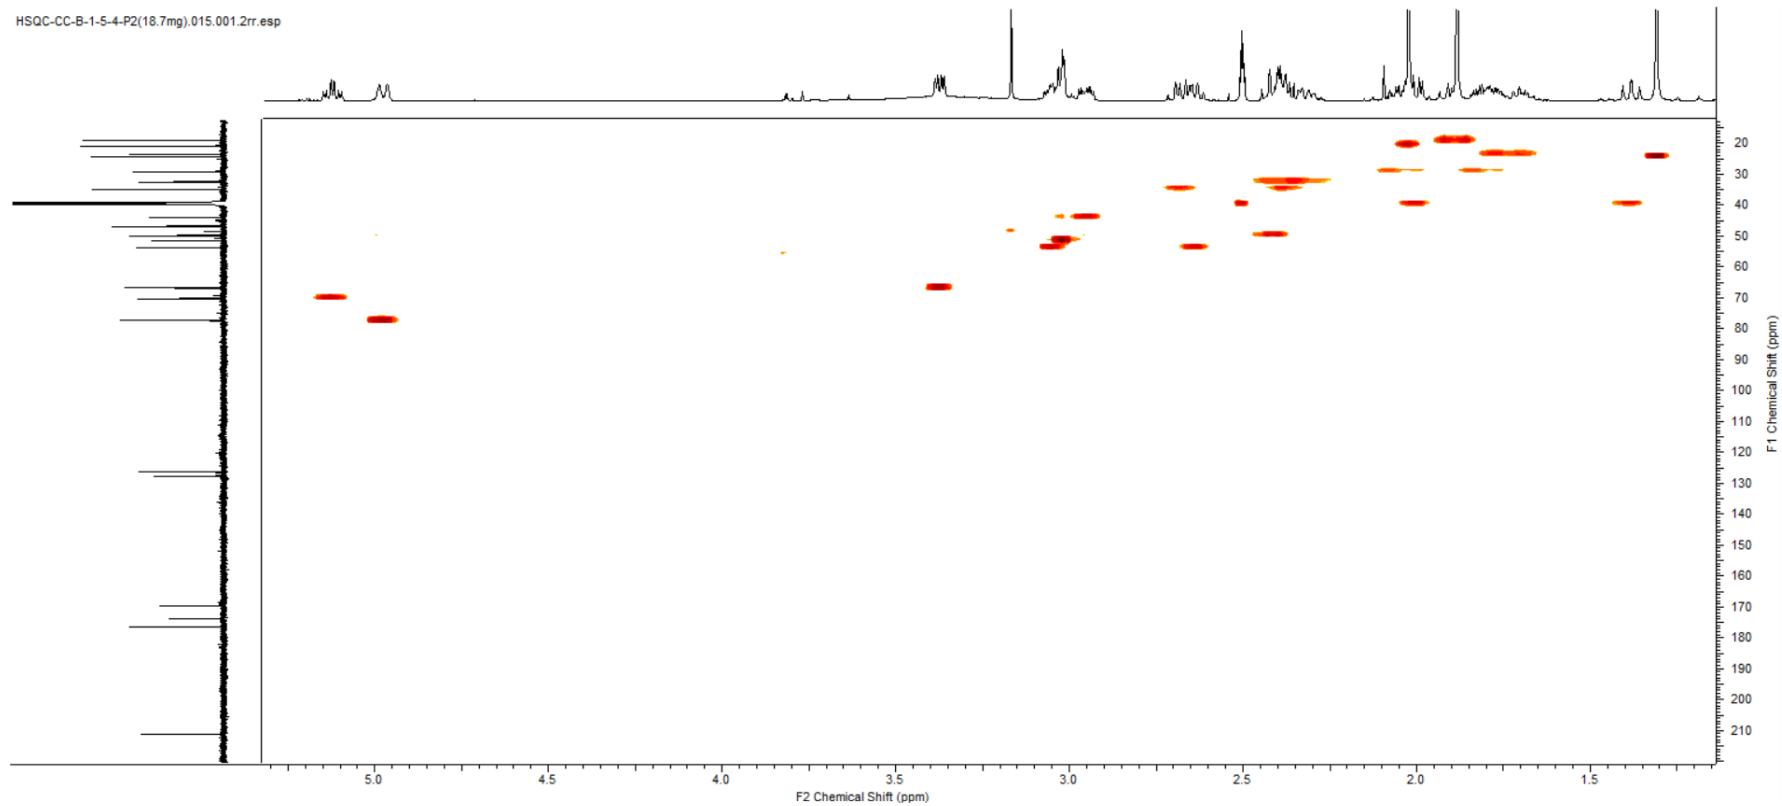

**Figure S44.** HSQC spectrum of **5** in DMSO- $d_6$  (500 MHz)

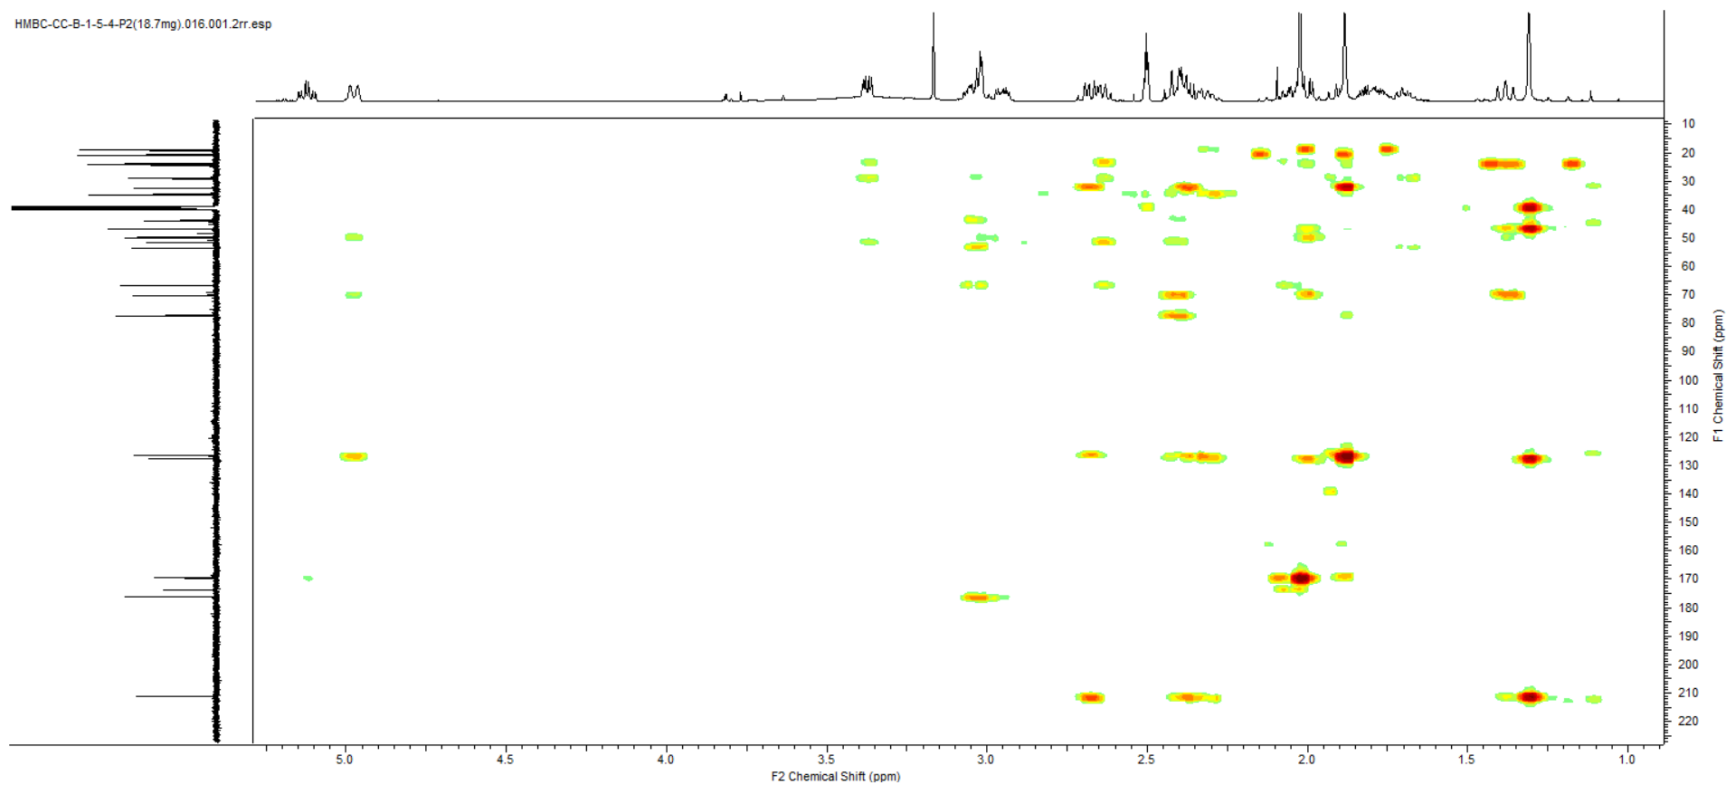

**Figure S45.** HMBC spectrum of **5** in DMSO- $d_6$  (500 MHz)

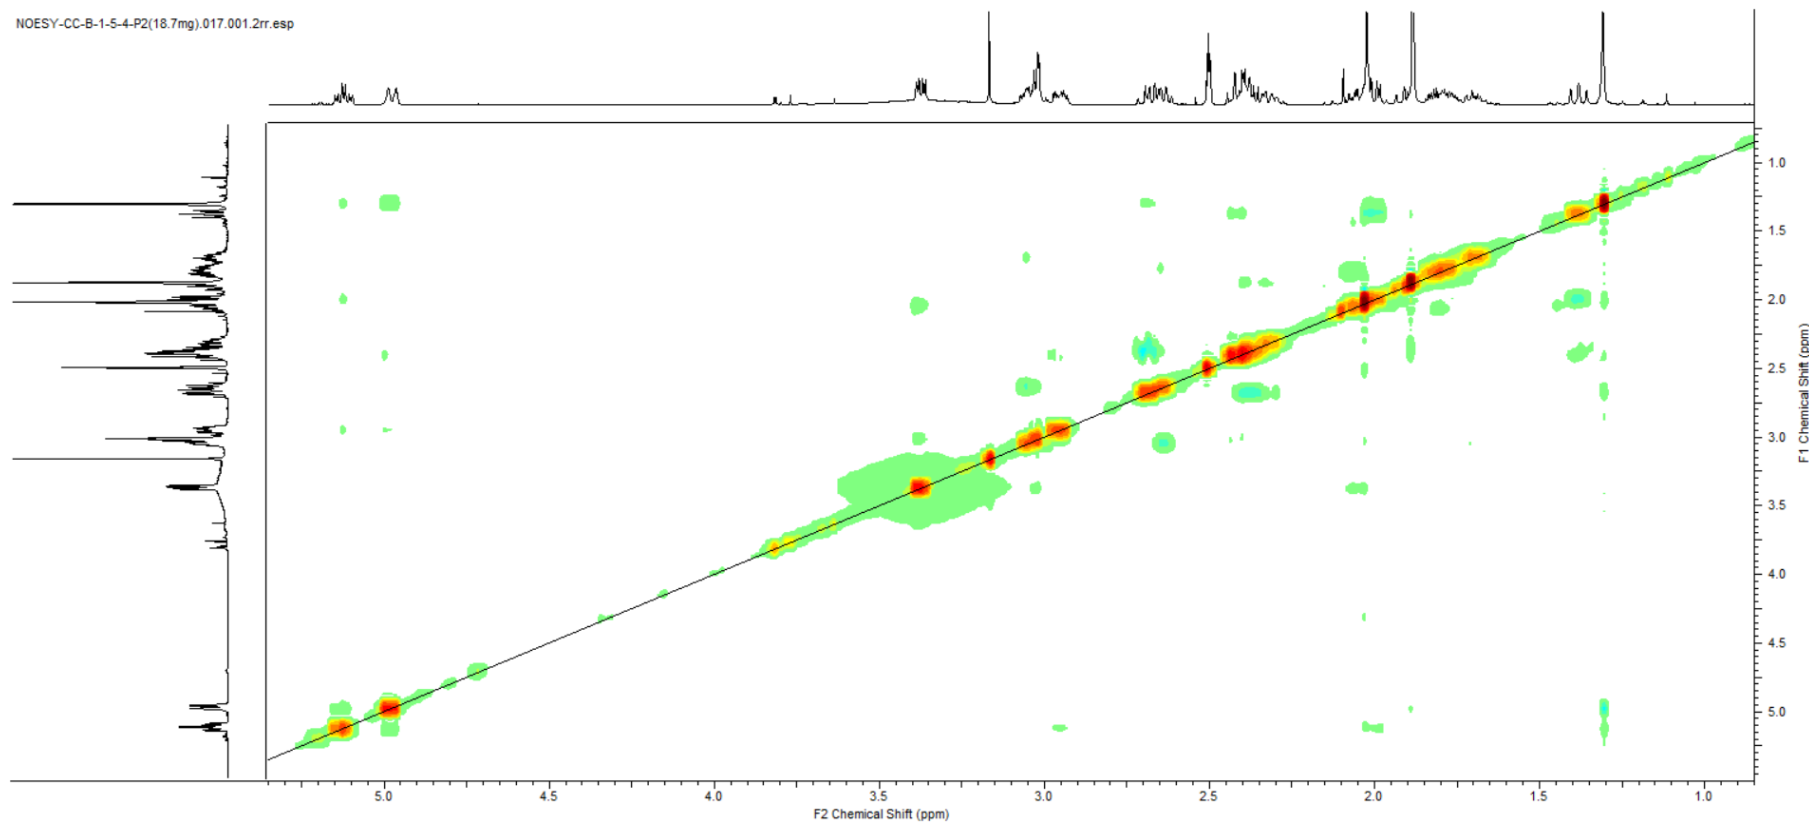

**Figure S46.** PS-NOESY spectrum of **5** in DMSO- $d_6$  (500 MHz)

CC-B-1-5-4-P2 + #7 RT: 0.08 AV: 1 NL: 1.84E6  
 F: FTMS + p ESI Full ms [100.00-2000.00]

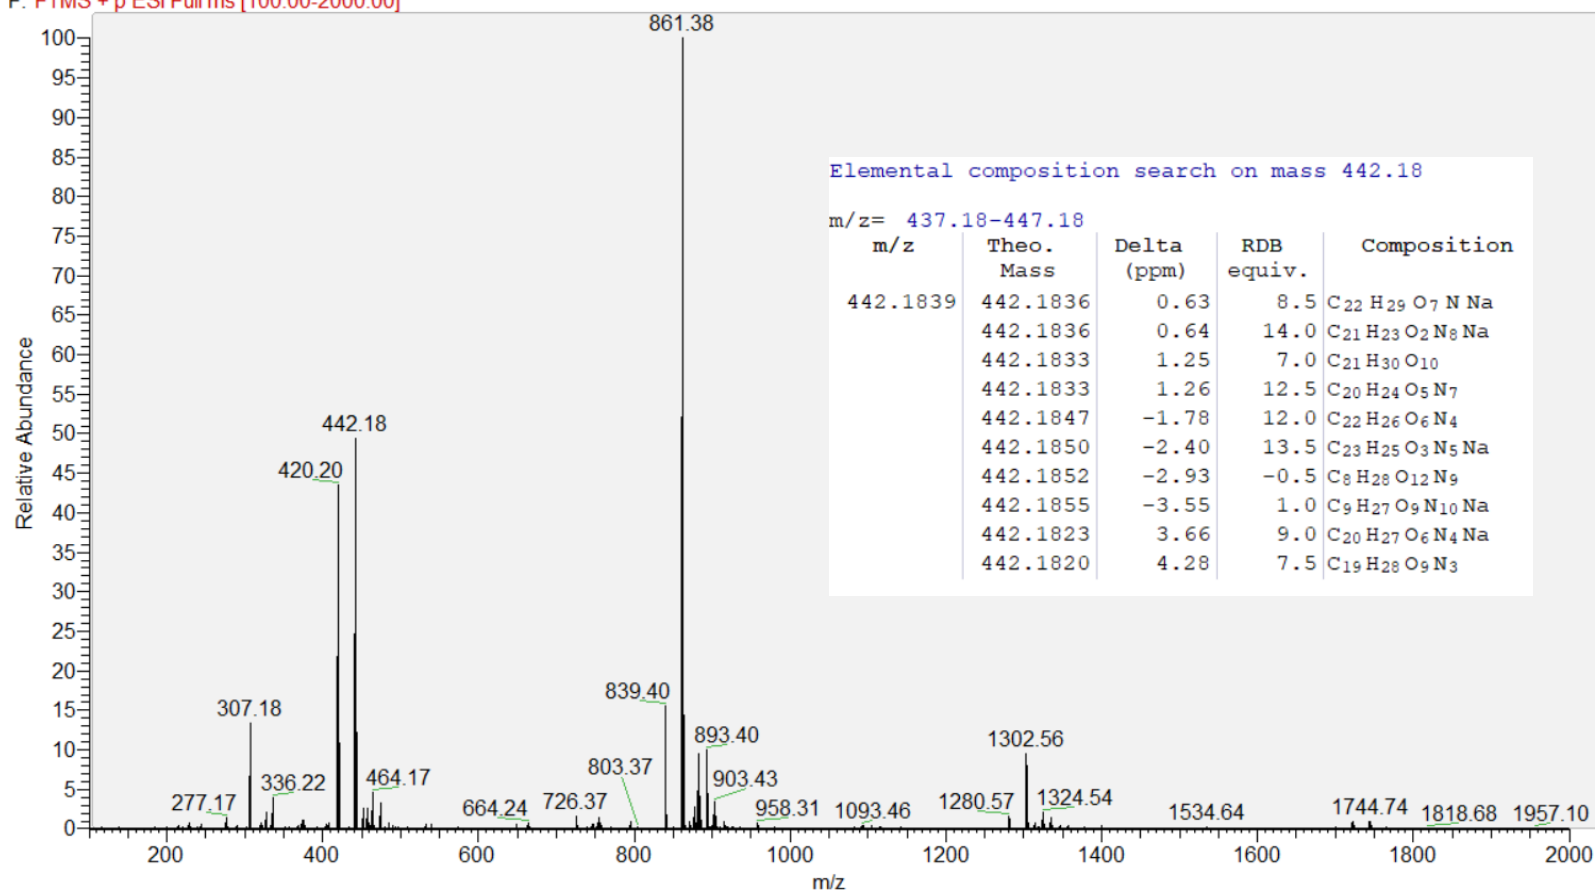

Figure S47. HR-ESI-MS spectrum of **5**

CC-B-1-5-4-P2 + #5 RT: 0.06 AV: 1 NL: 3.10E3  
F: ITMS + c ESI d Full ms2 442.18@cid35.00 [110.00-455.00]

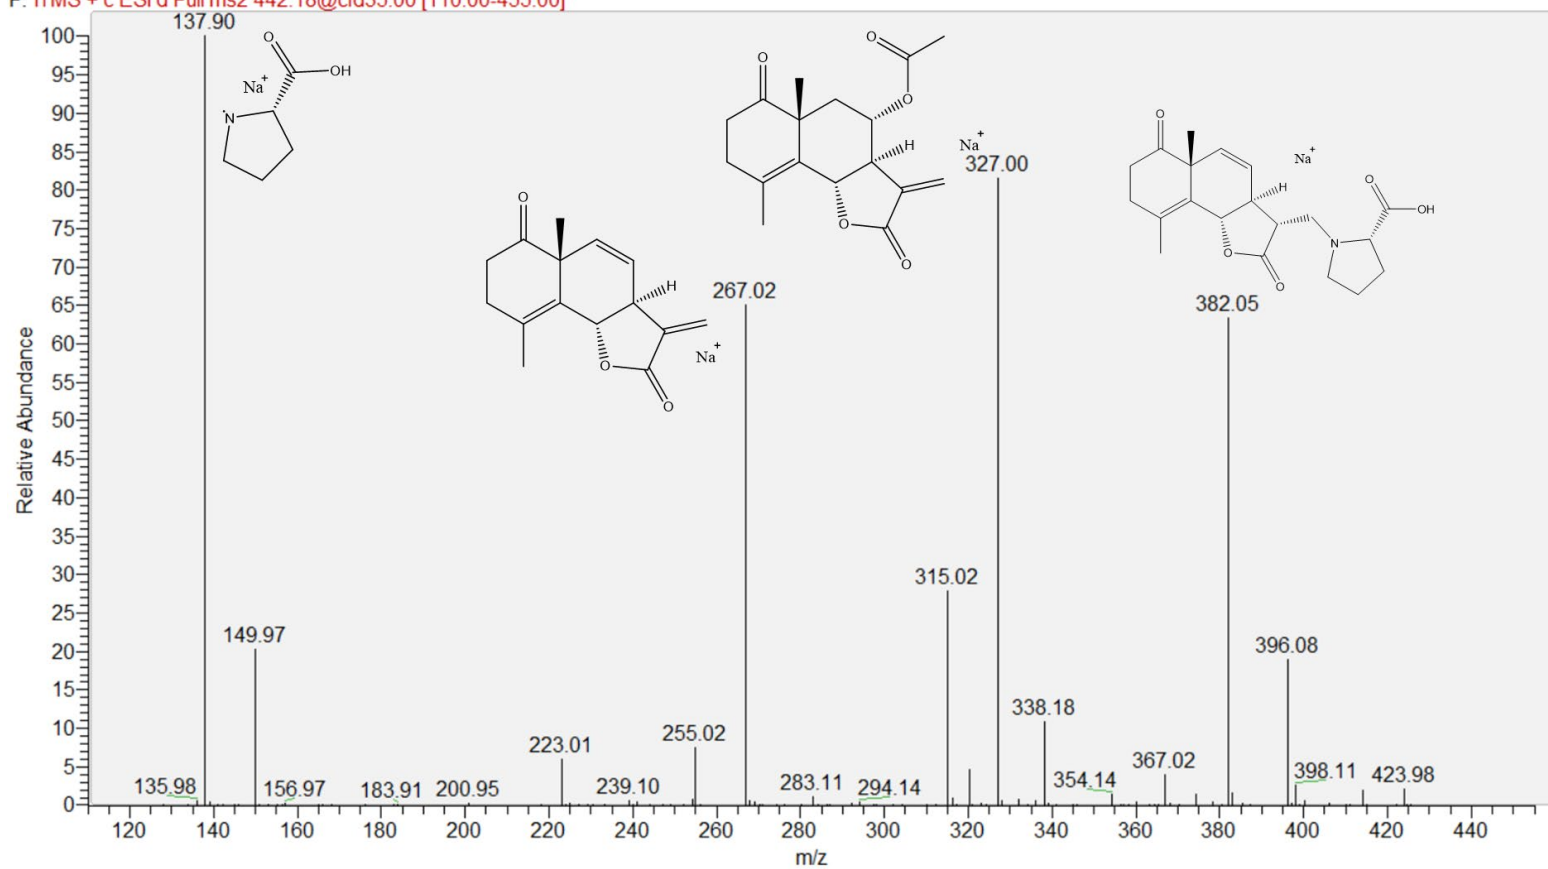

Figure S48. ESI-MS/MS spectrum of 5

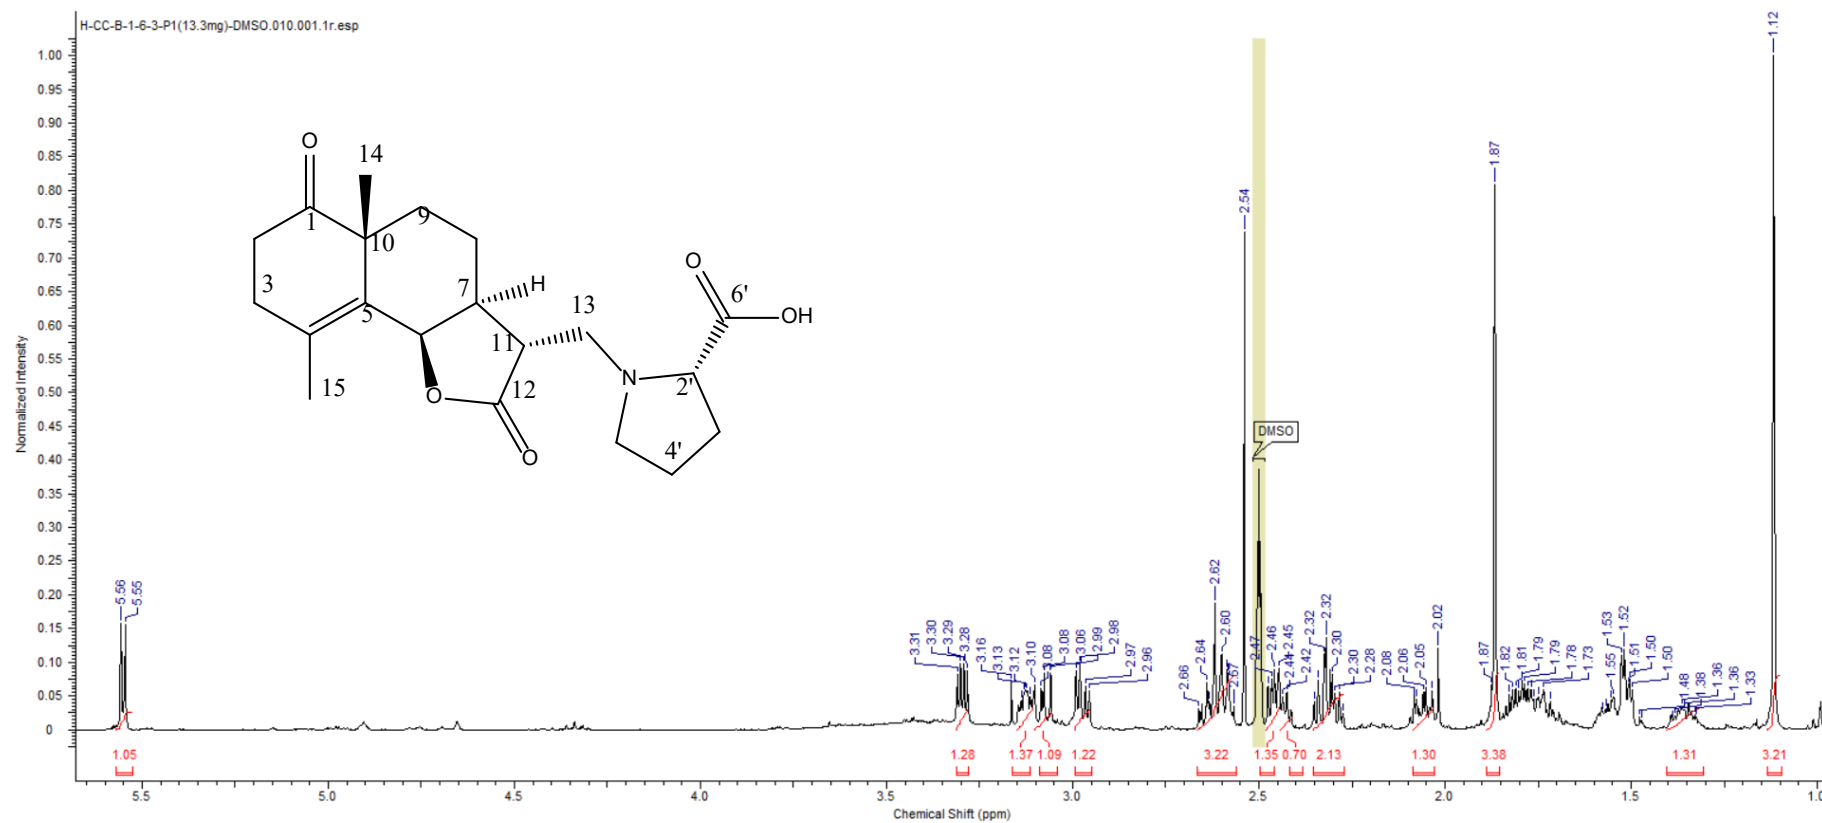

Figure S49.  $^1\text{H}$ -NMR spectrum of **6** in  $\text{DMSO}-d_6$  (500 MHz)



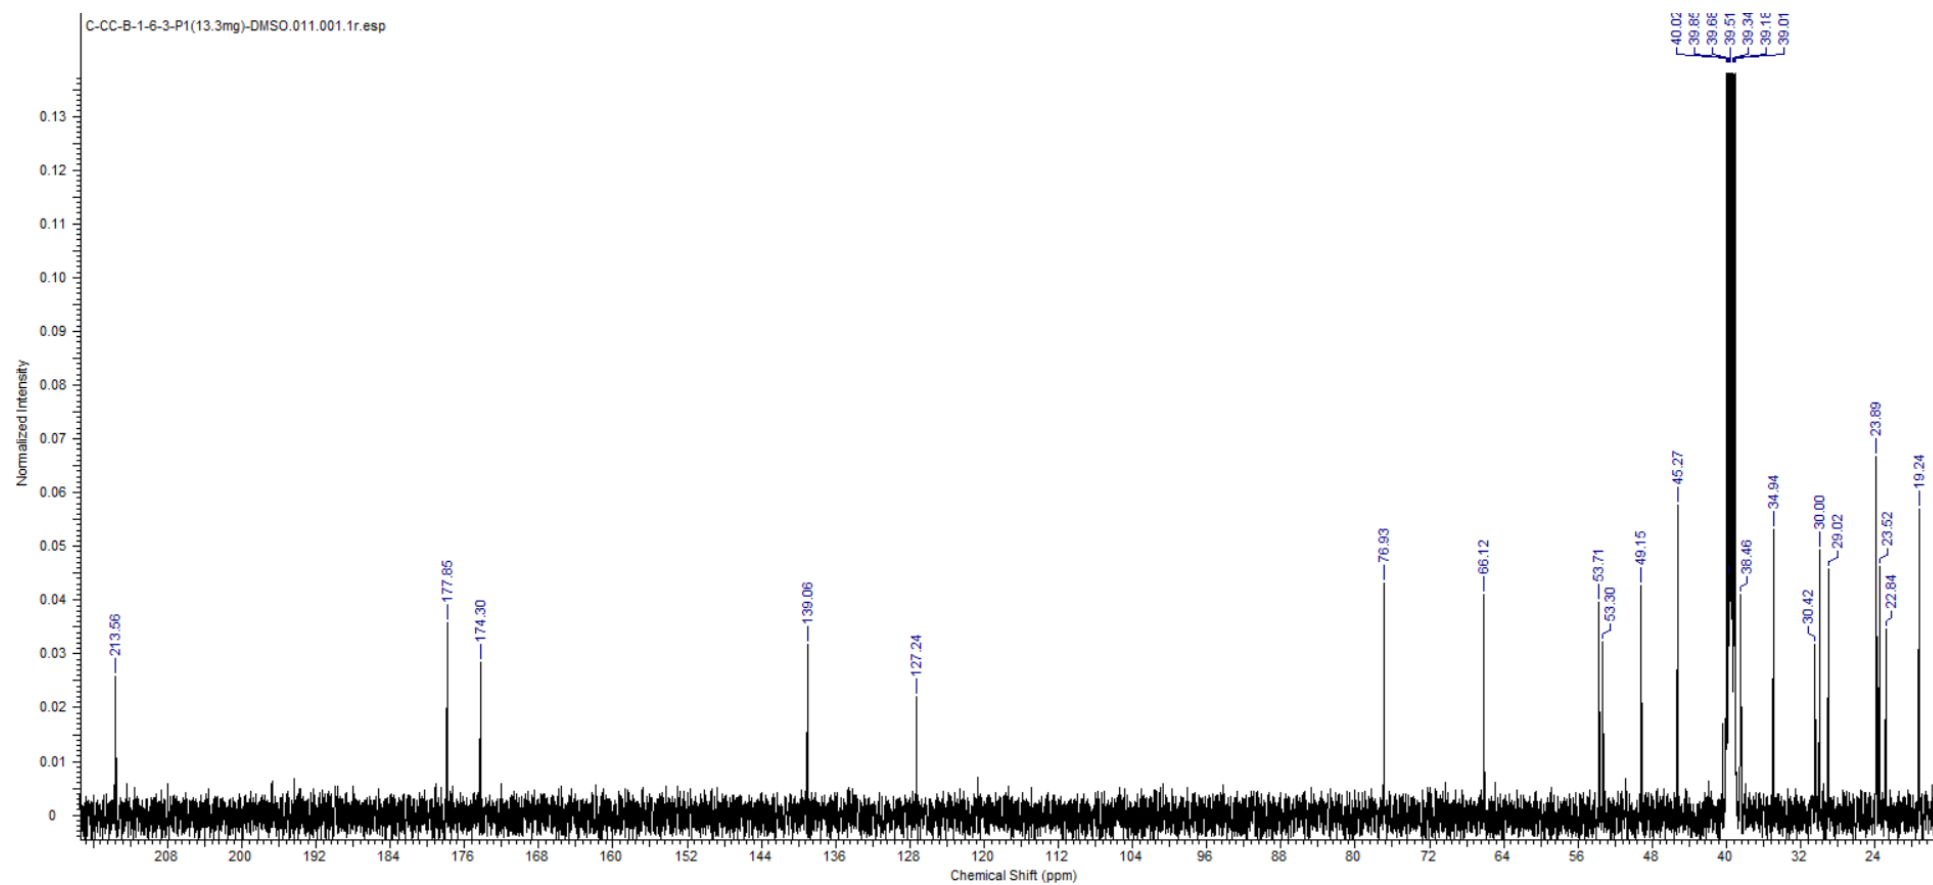

**Figure S50.**  $^{13}\text{C}$ -NMR spectrum of **6** in  $\text{DMSO}-d_6$  (125 MHz)

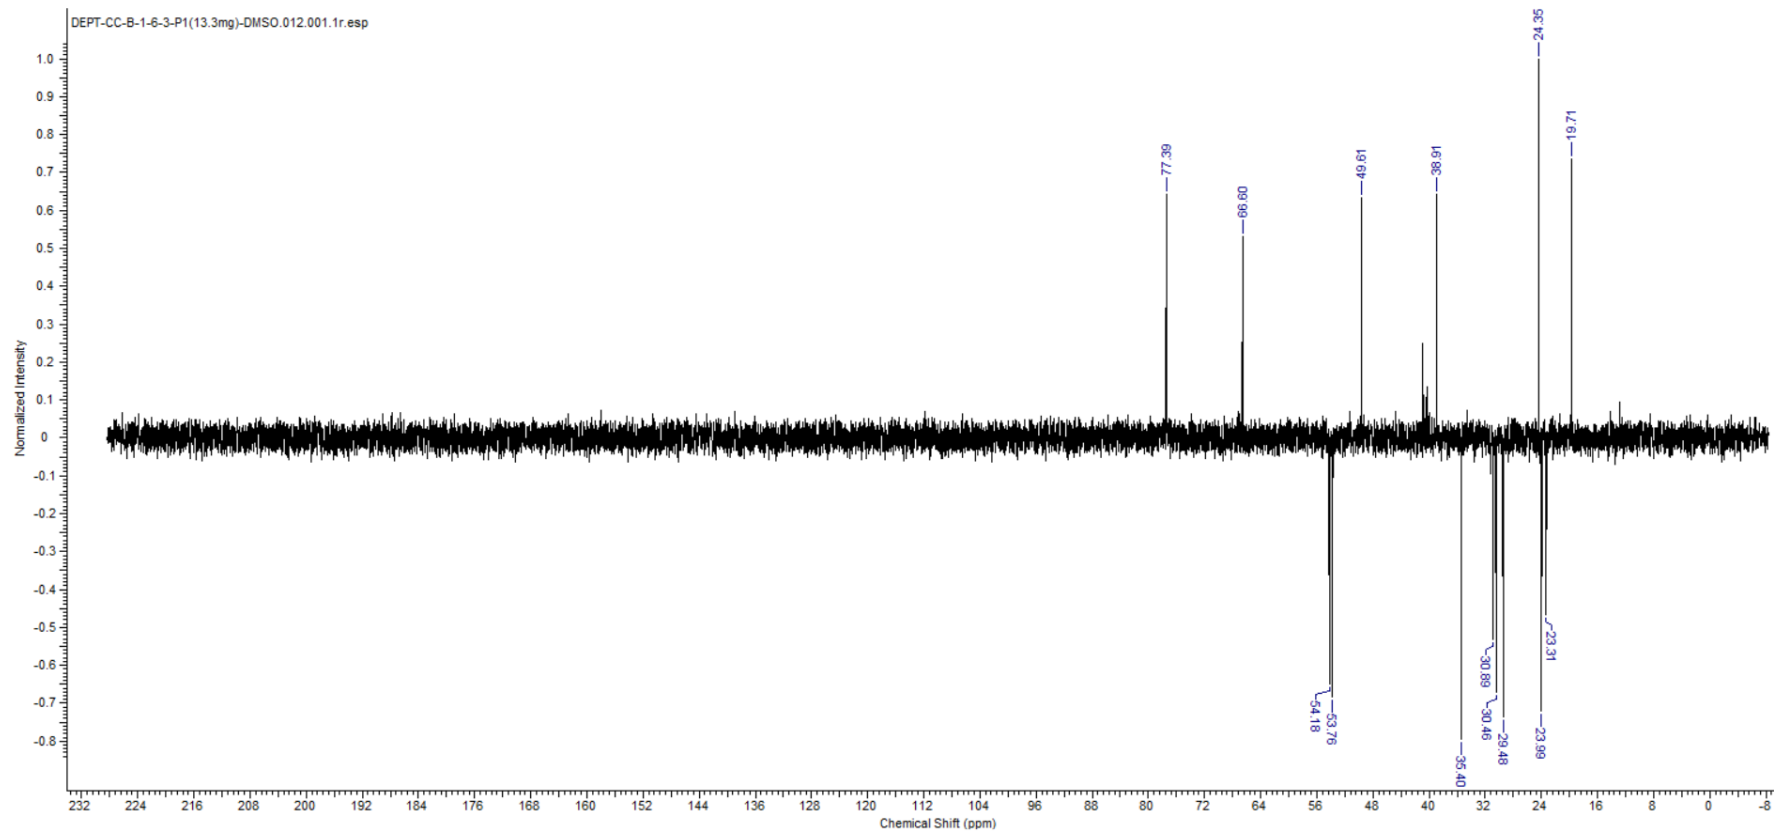

**Figure S51.**  $^{13}\text{C}$  DEPT135 NMR spectrum of **6** in  $\text{DMSO-}d_6$  (125 MHz)

COSY-CC-B-1-6-3-P1(13.3mg)-DMSO.014.001.2rr.esp

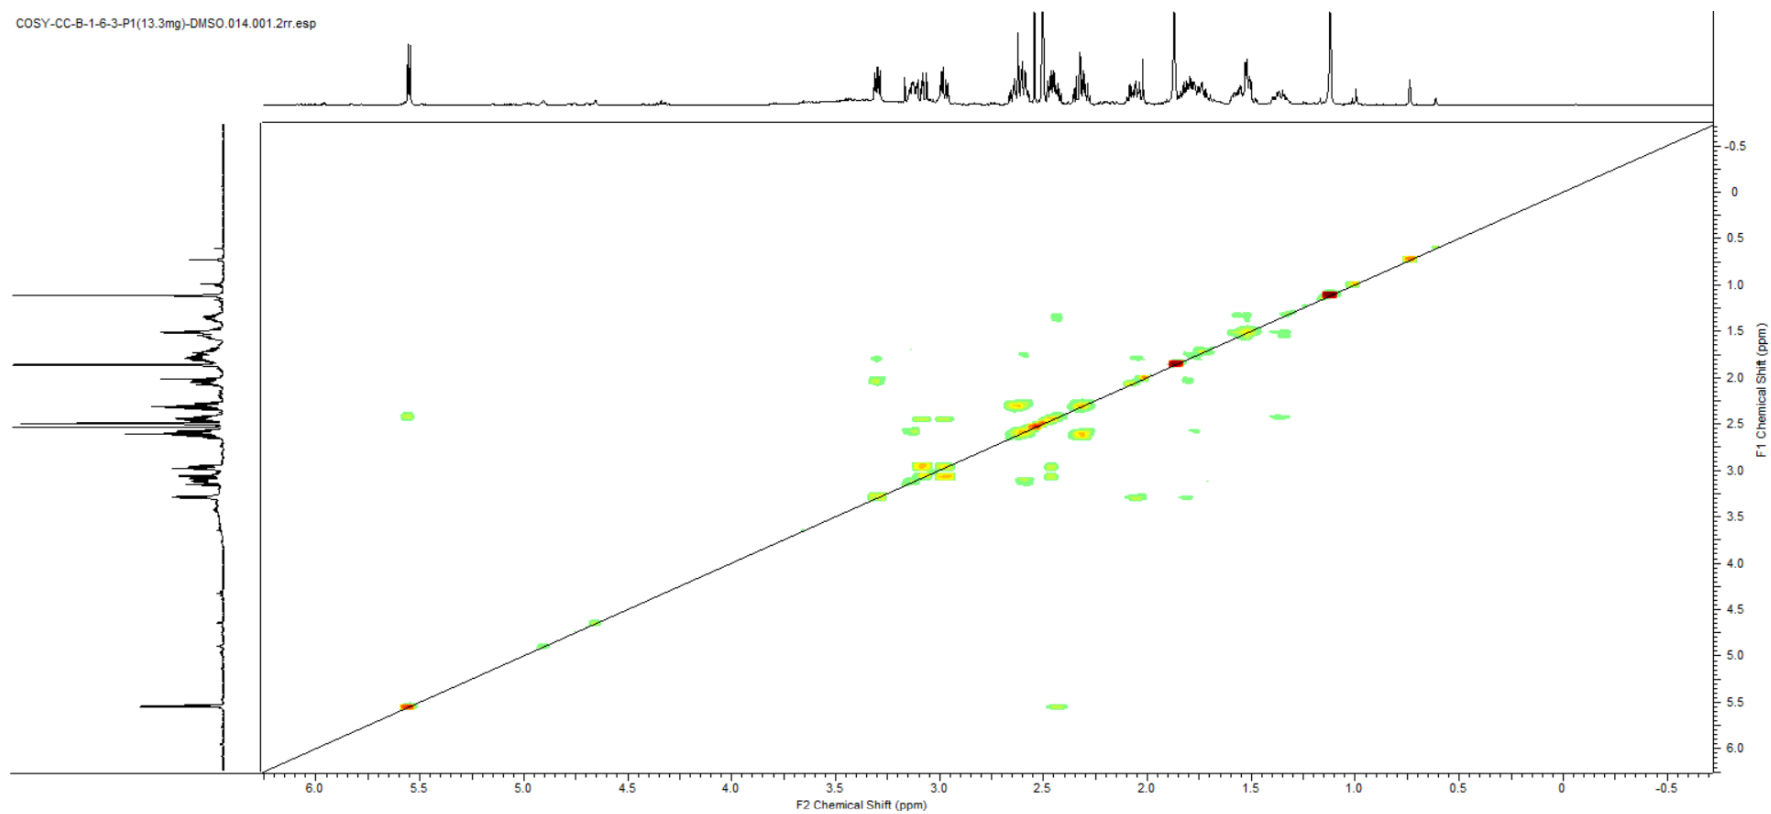

**Figure S52.** <sup>1</sup>H-<sup>1</sup>H COSY spectrum of **6** in DMSO-*d*<sub>6</sub> (500 MHz)

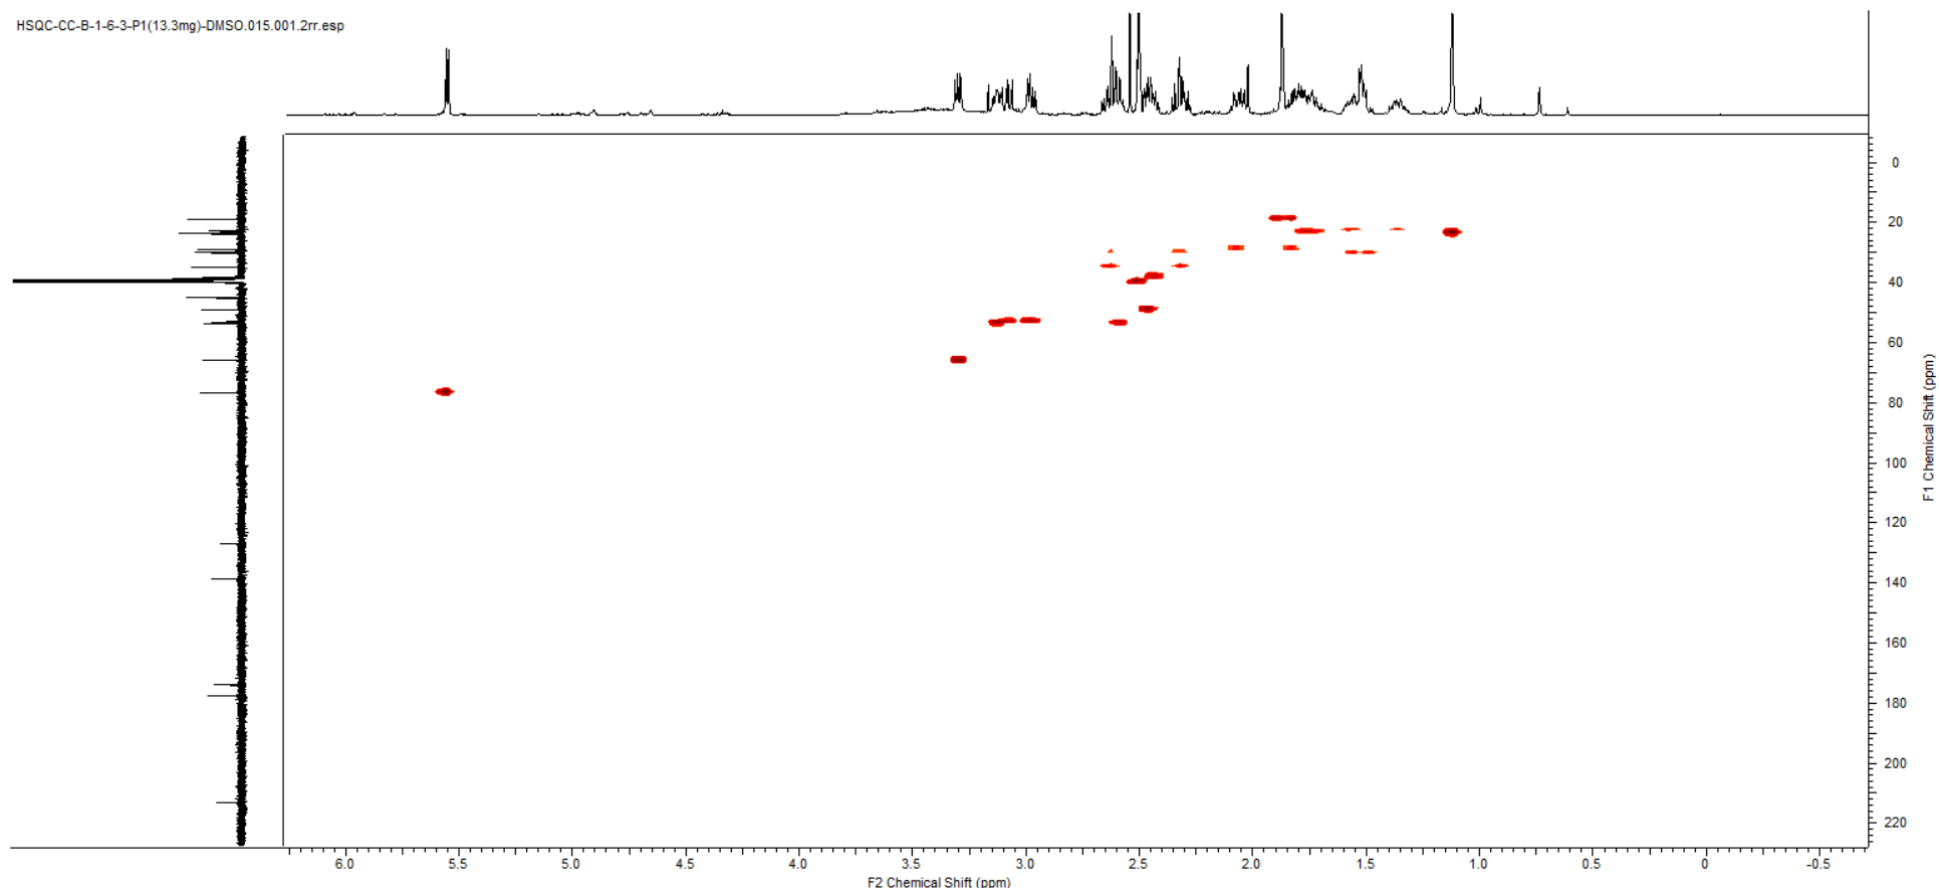

**Figure S53.** HSQC spectrum of **6** in DMSO-*d*<sub>6</sub> (500 MHz)

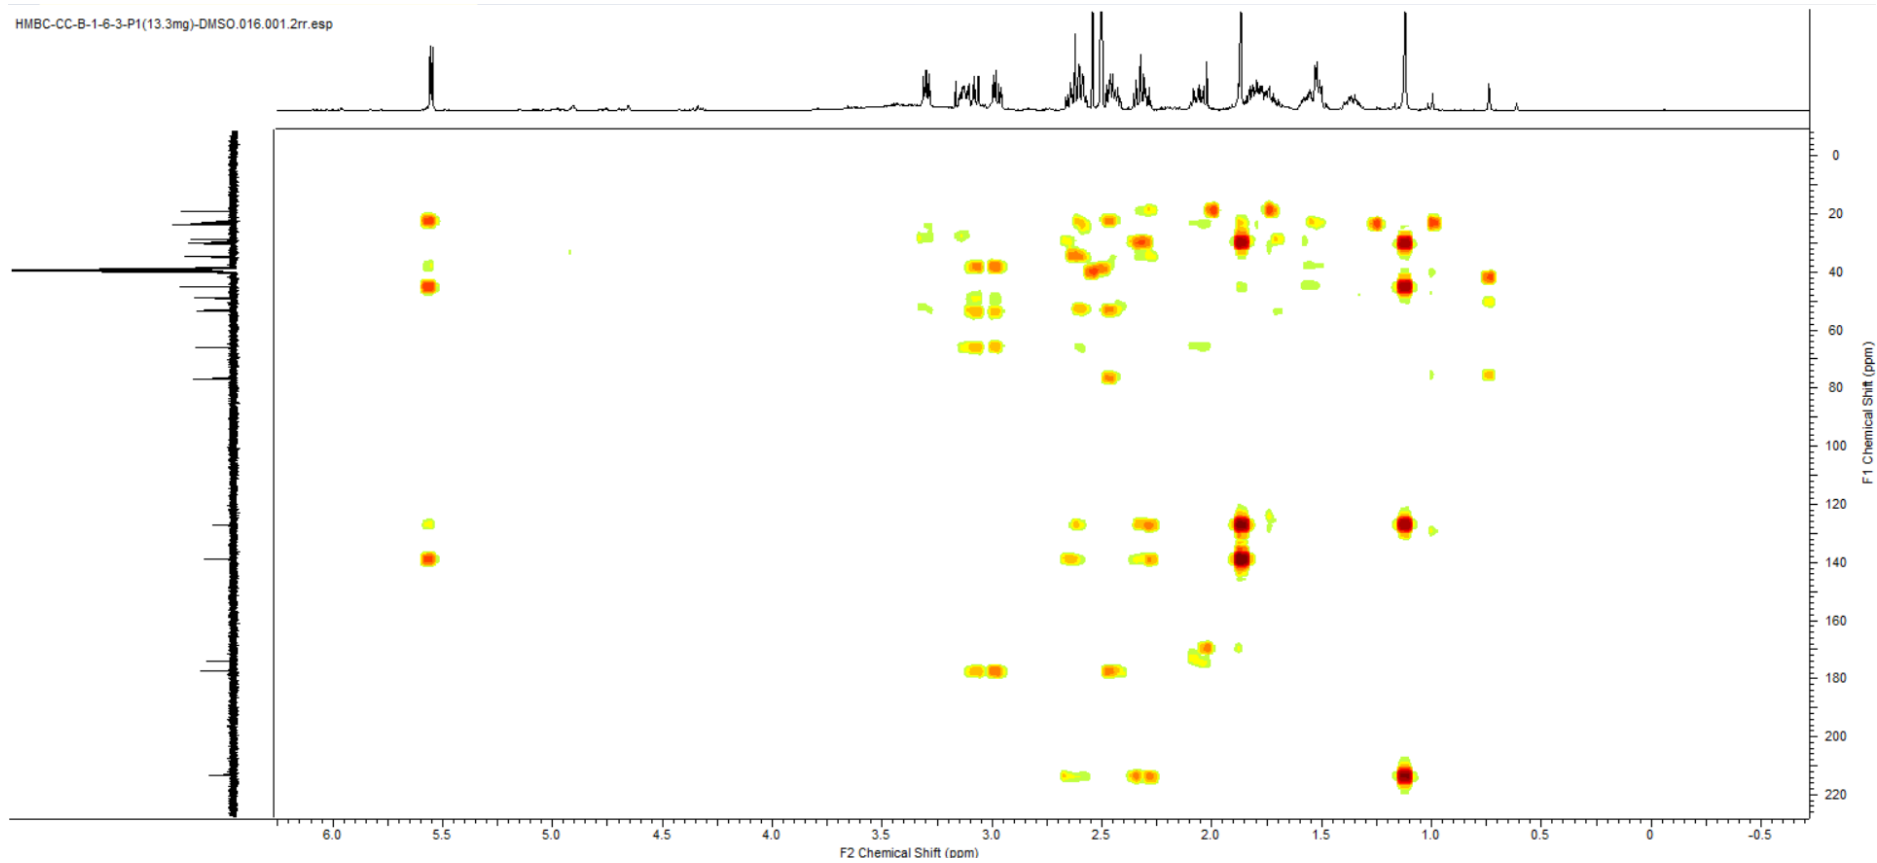

**Figure S54.** HMBC spectrum of **6** in DMSO-*d*<sub>6</sub> (500 MHz)

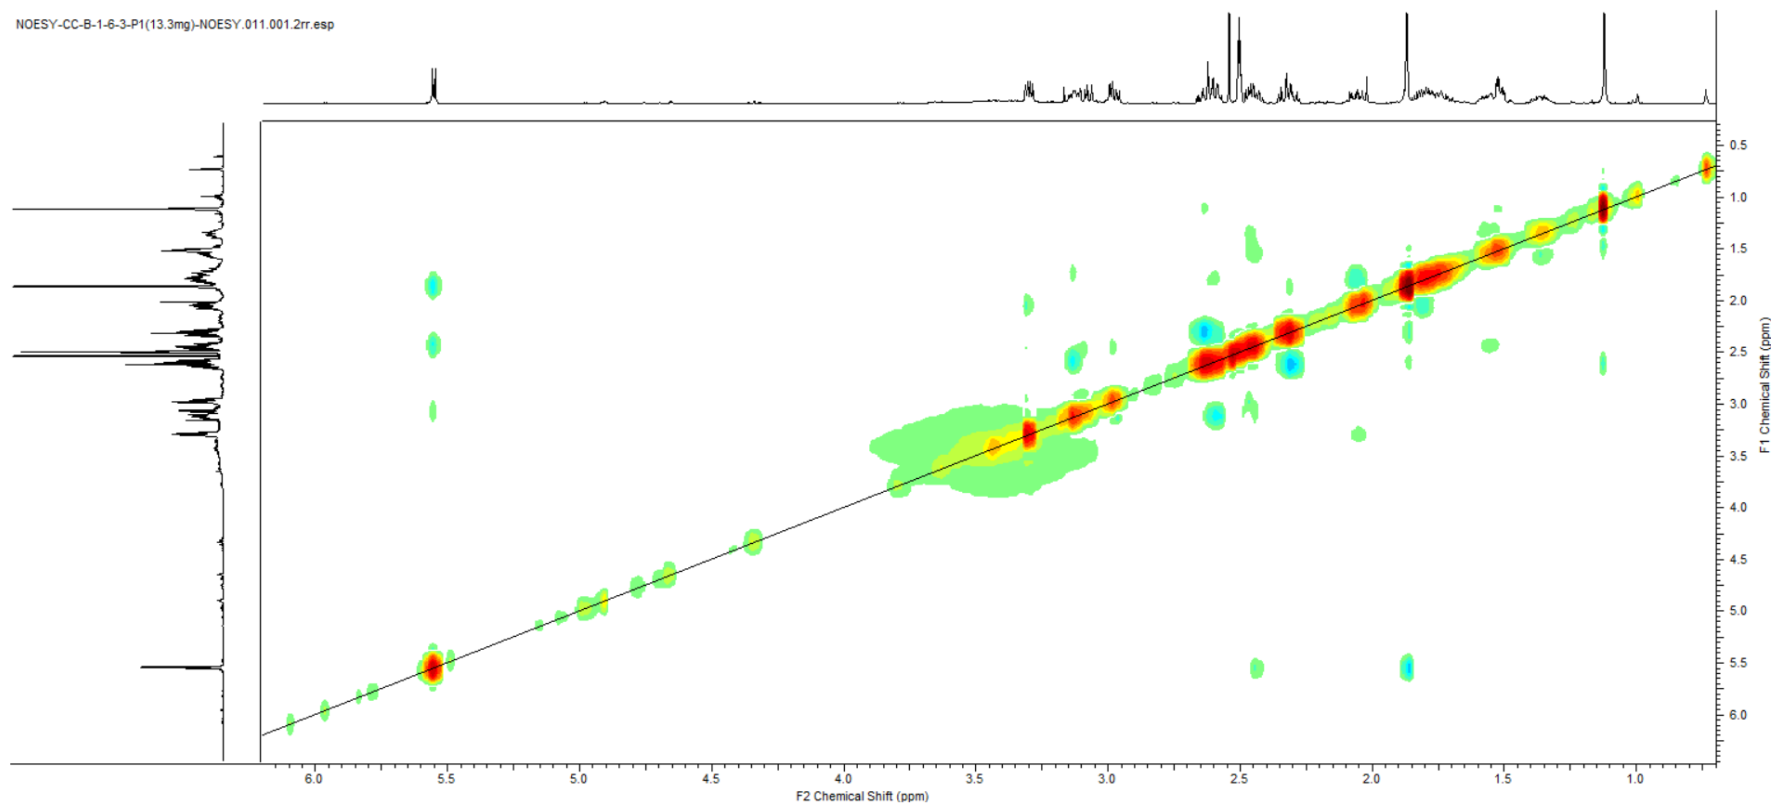

**Figure S55.** PS-NOESY spectrum of **6** in  $\text{DMSO}-d_6$  (500 MHz)

CC-B-1-6-3-P1 + #10 RT: 0.13 AV: 1 NL: 1.19E6  
F: FTMS + p ESI Full ms [100.00-2000.00]

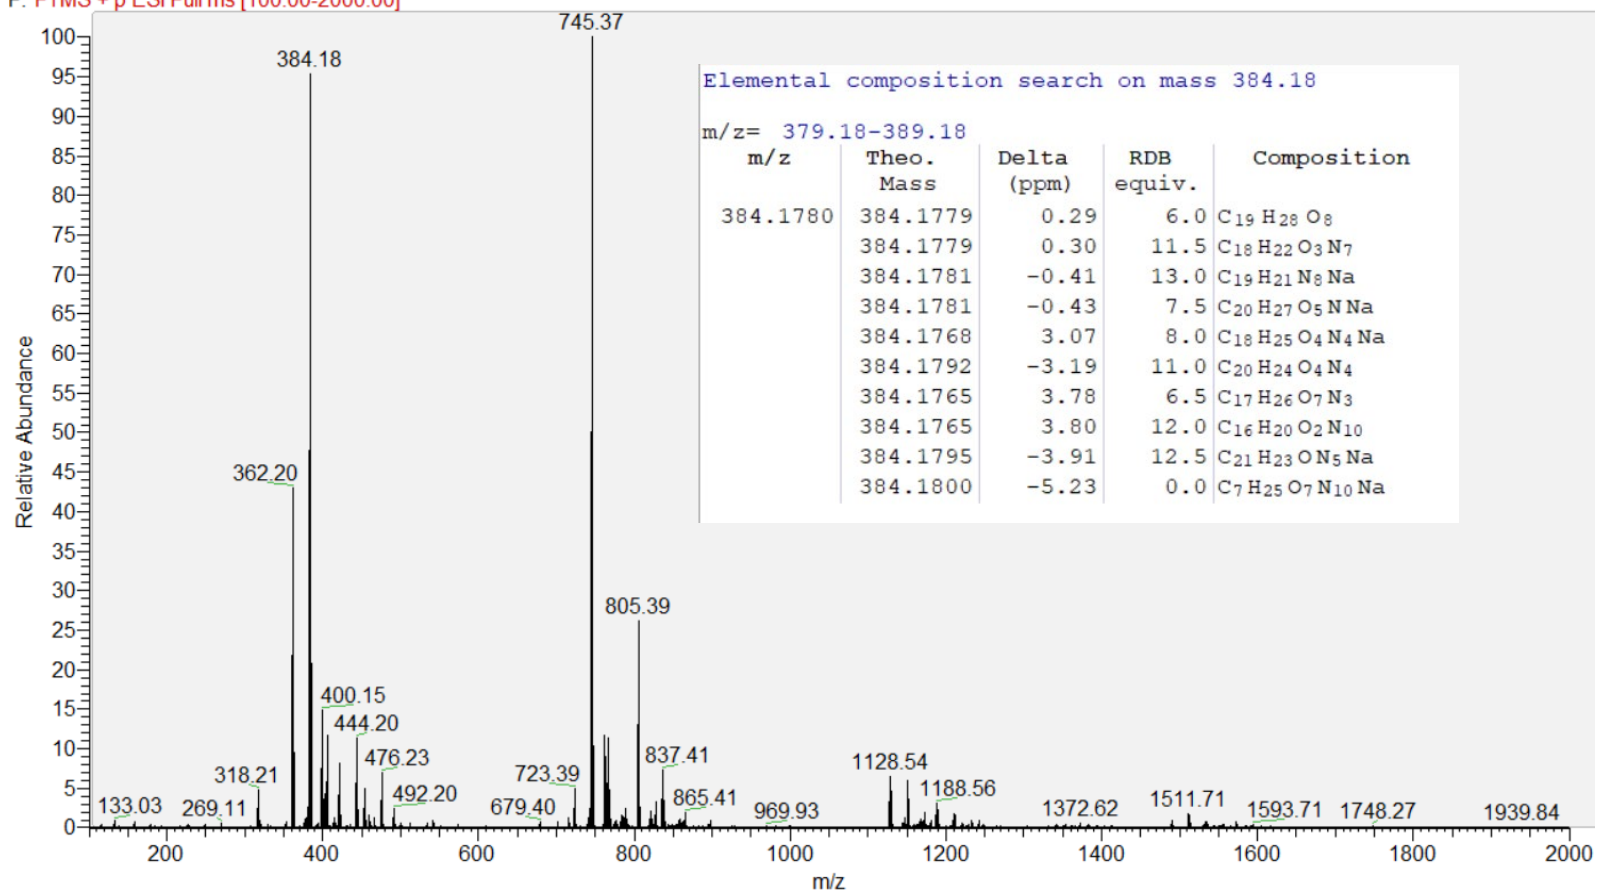

Figure S56. HR-ESI-MS spectrum of **6**

CC-B-1-6-3-P1 + #11 RT: 0.14 AV: 1 NL: 6.52E3  
F: ITMS + c ESI d Full ms2 384.18@cid35.00 [95.00-395.00]

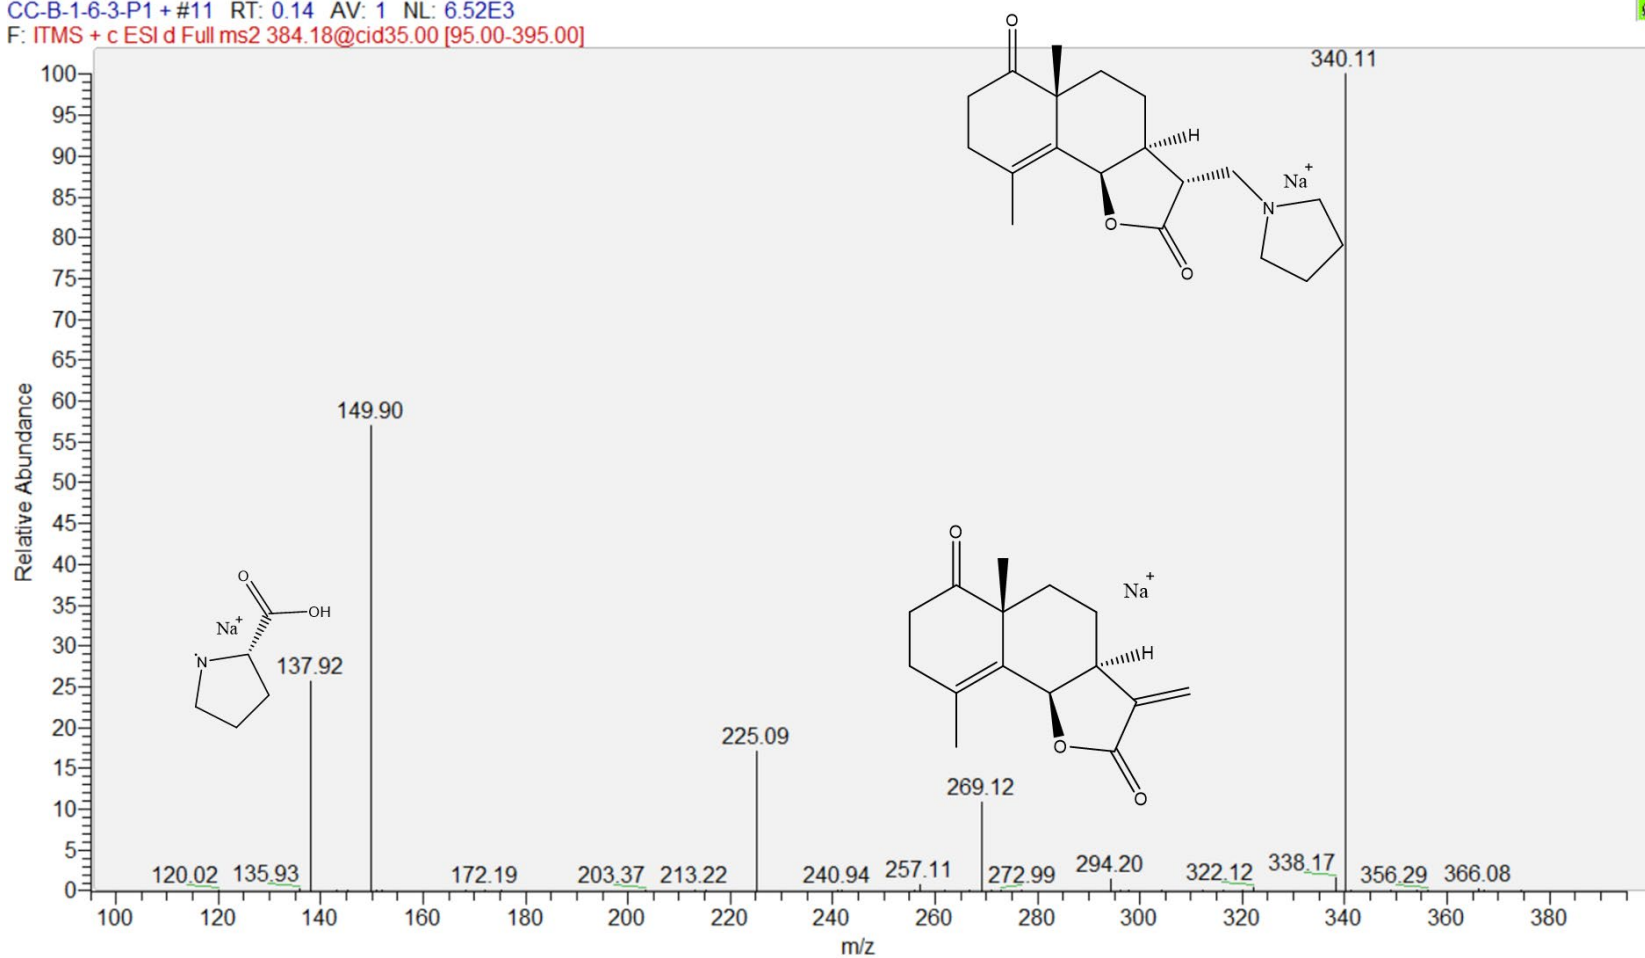

Figure S57. ESI-MS/MS spectrum of 6



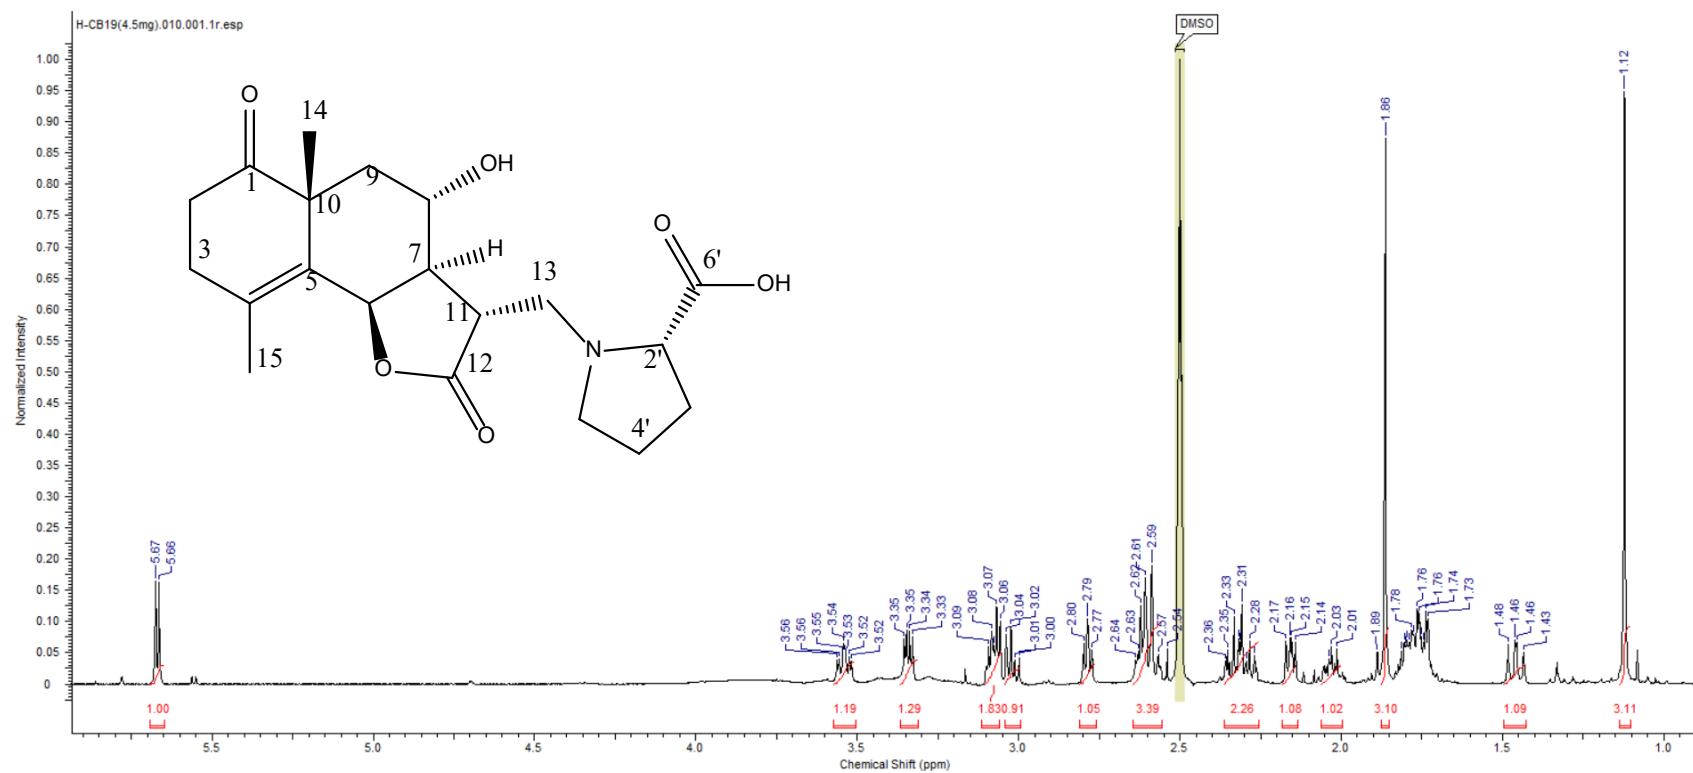

Figure S58.  $^1\text{H}$ -NMR spectrum of **7** in  $\text{DMSO}-d_6$  (500 MHz)

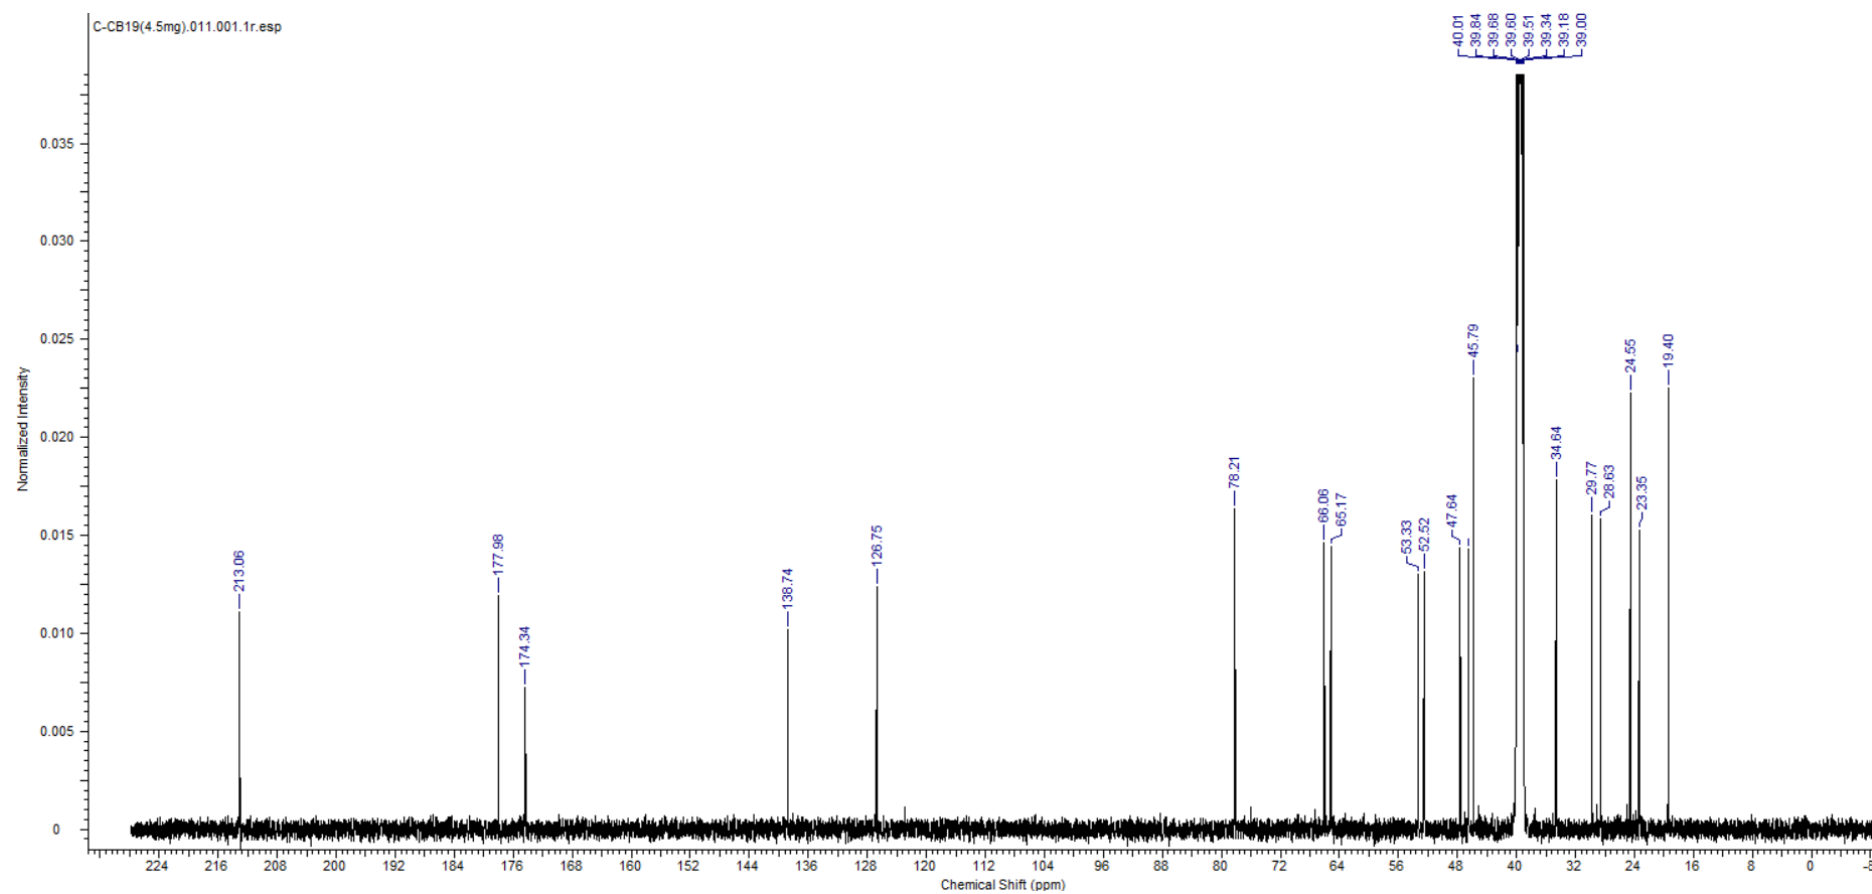

**Figure S59.**  $^{13}\text{C}$ -NMR spectrum of **7** in  $\text{DMSO}-d_6$  (125 MHz)

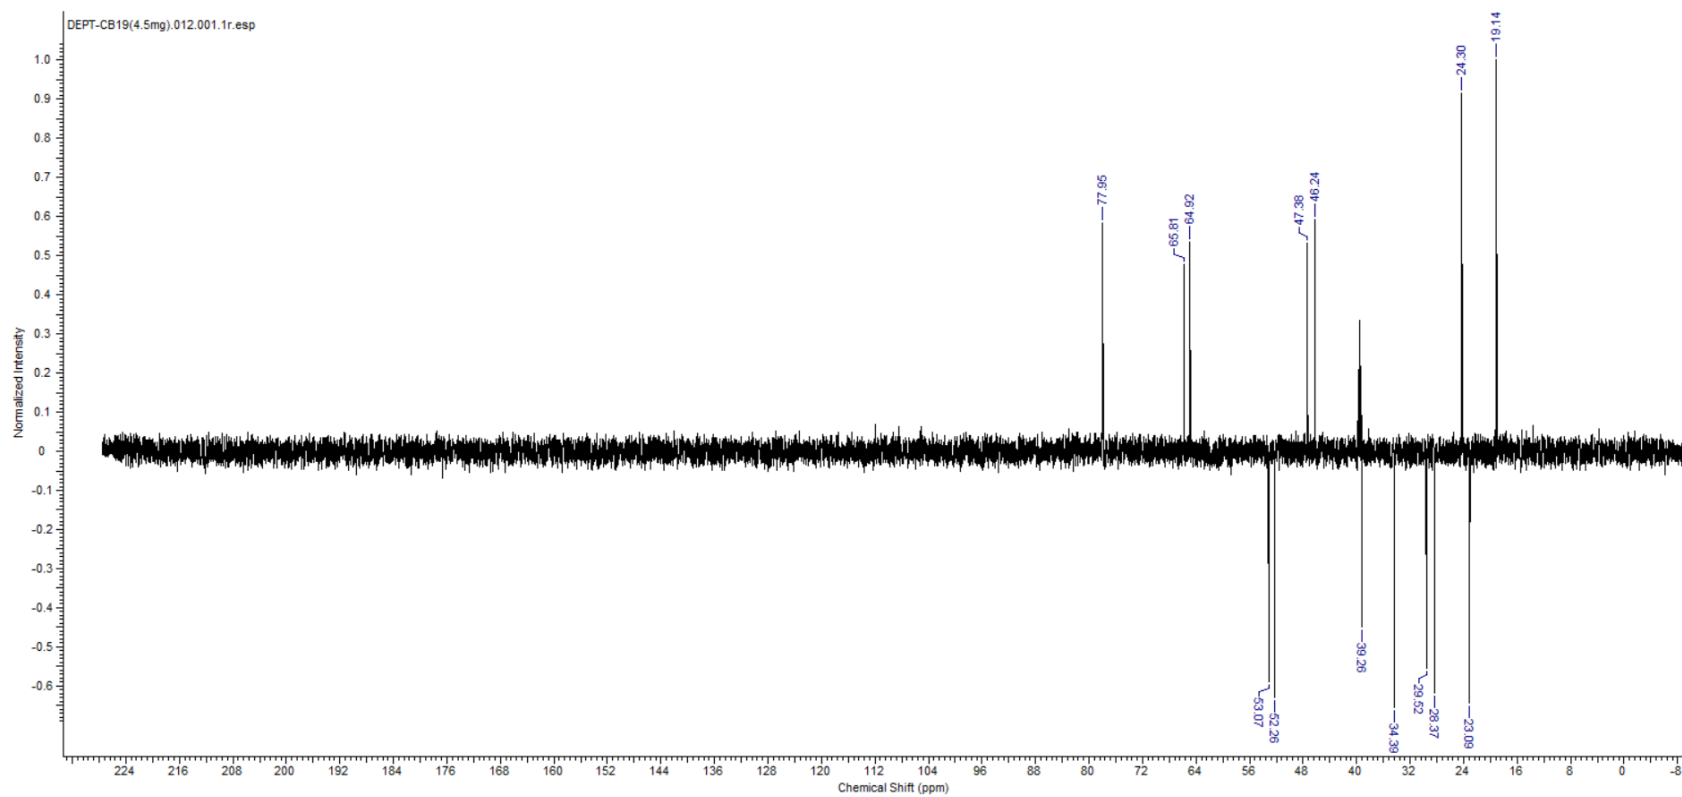

**Figure S60.**  $^{13}\text{C}$  DEPT135 NMR spectrum of **7** in  $\text{DMSO-}d_6$  (125 MHz)



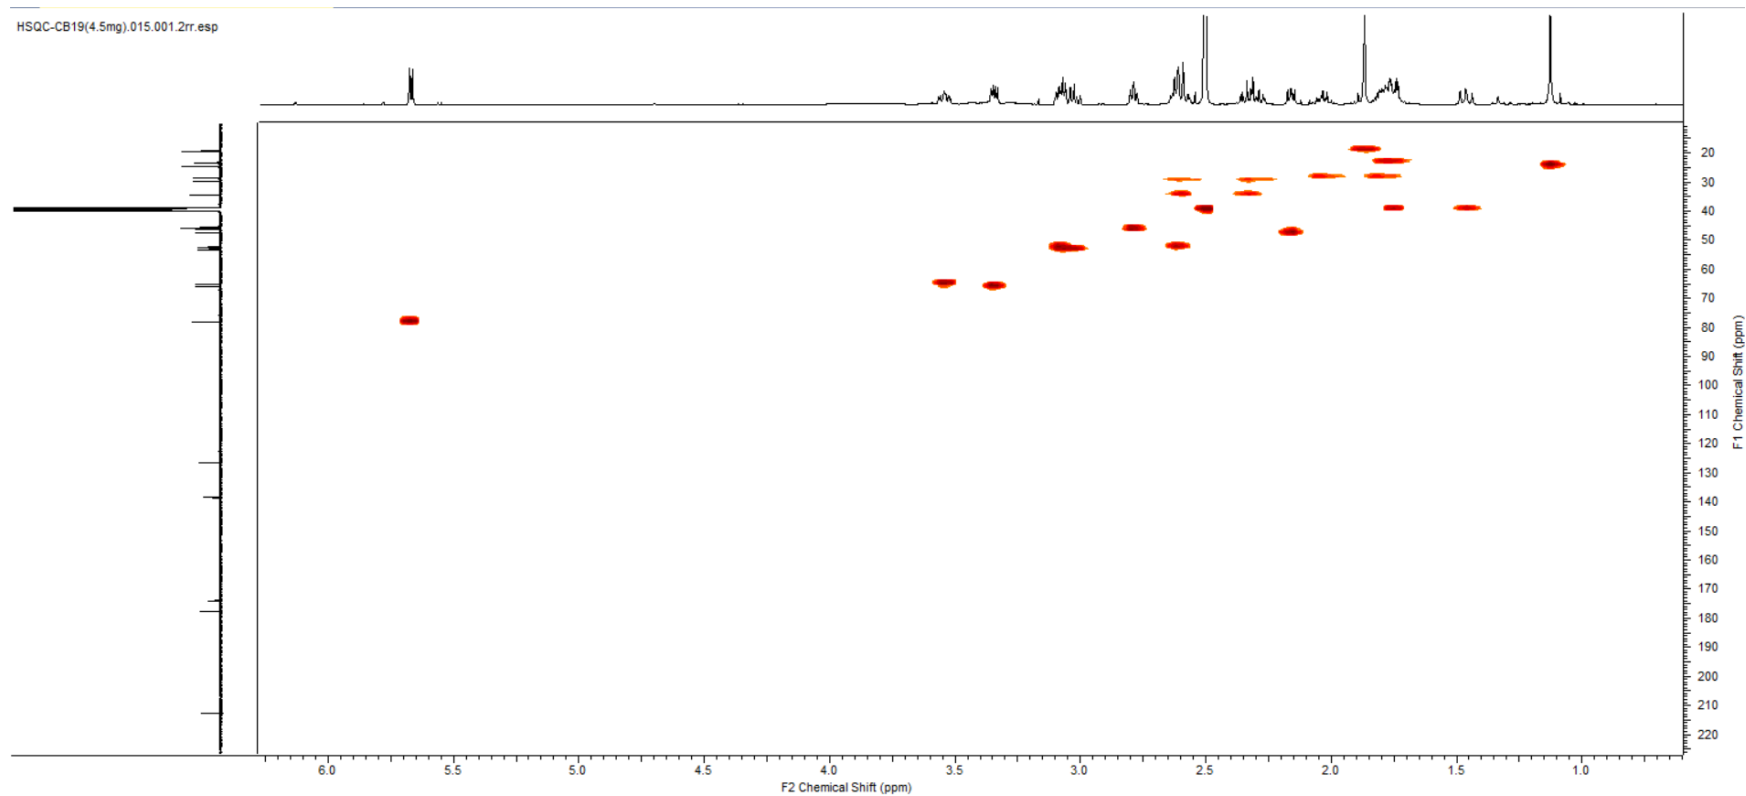

**Figure S62.** HSQC spectrum of **7** in DMSO-*d*<sub>6</sub> (500 MHz)

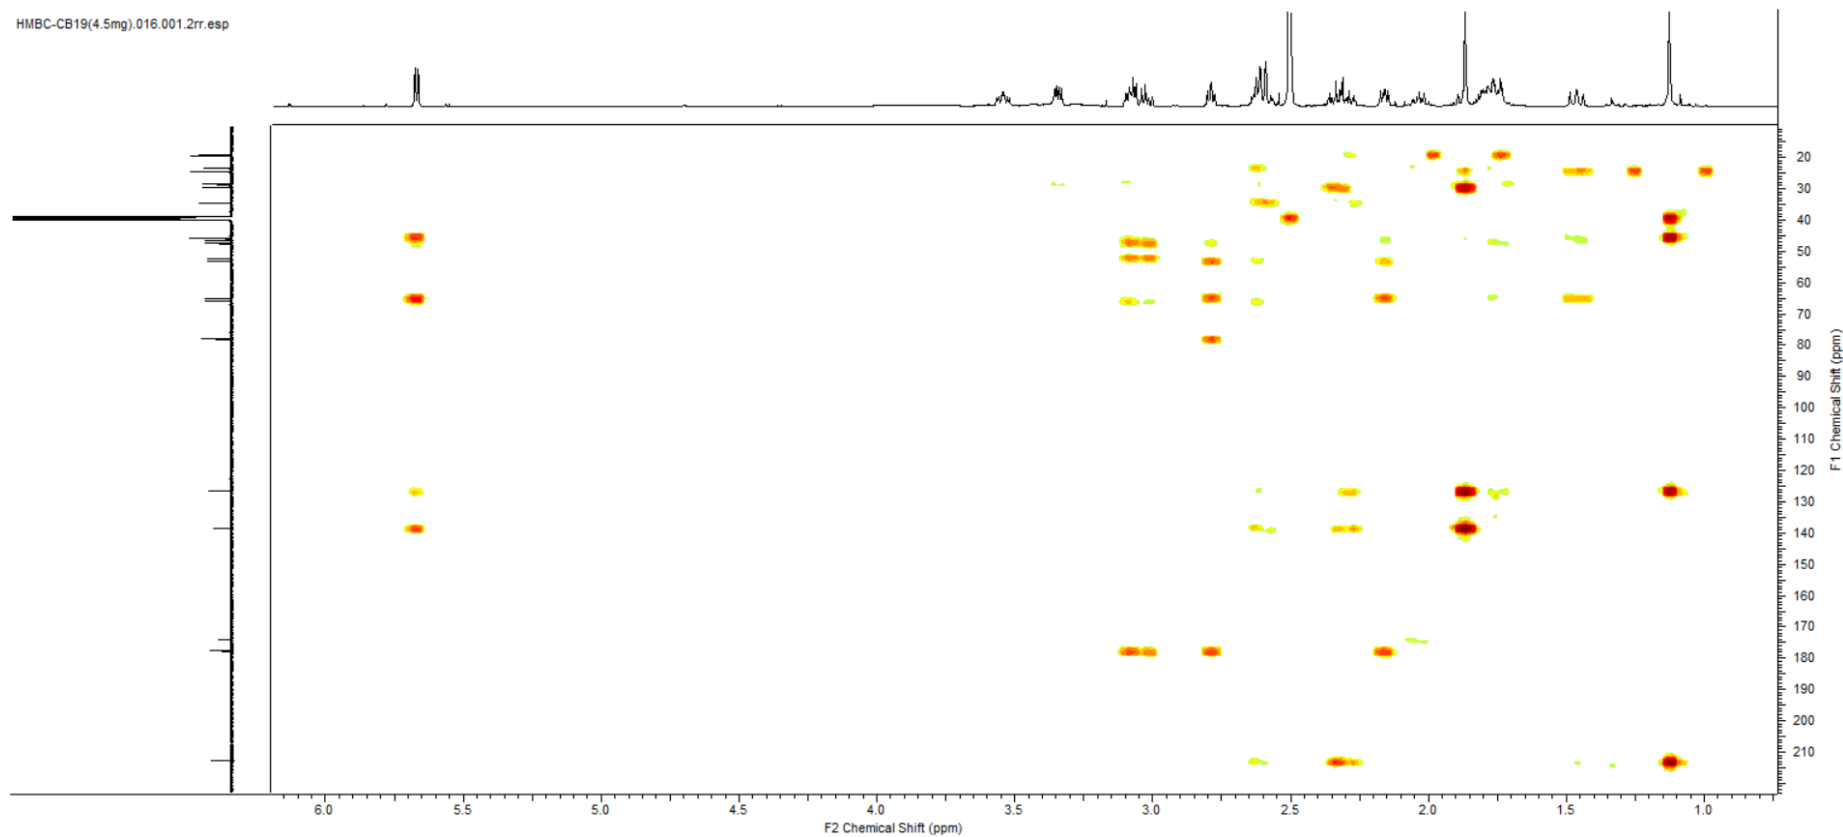

**Figure S63.** HMBC spectrum of **7** in DMSO-*d*<sub>6</sub> (500 MHz)

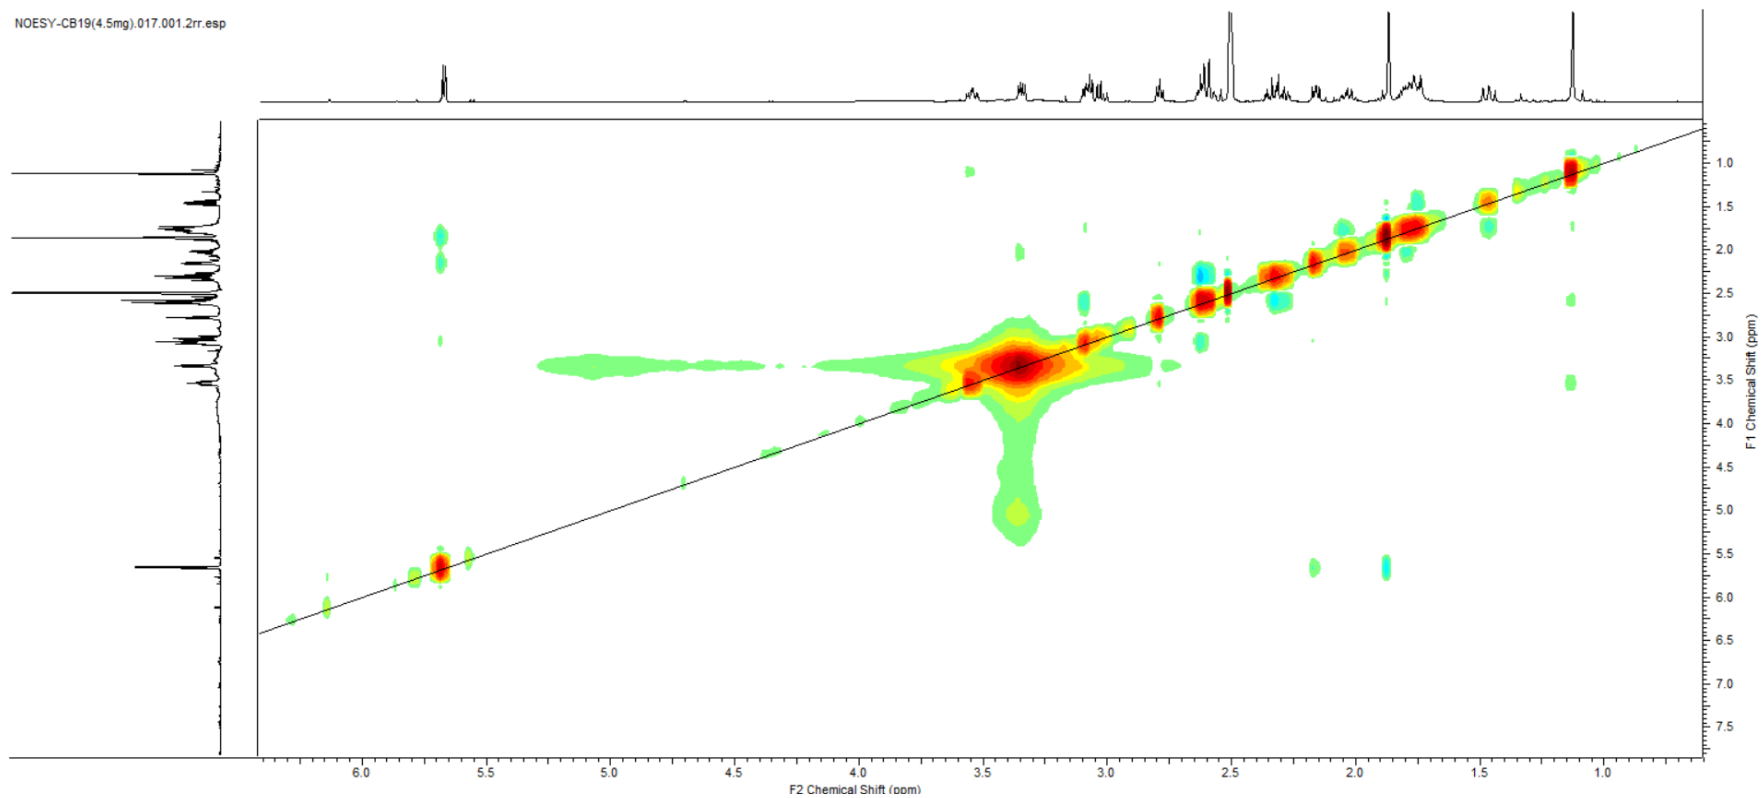

**Figure S64.** PS-NOESY spectrum of **7** in DMSO-*d*<sub>6</sub> (500 MHz)

CC-B-1-5-3-P1 + #7 RT: 0.08 AV: 1 NL: 7.81E5  
 F: FTMS + p ESI Full ms [100.00-2000.00]

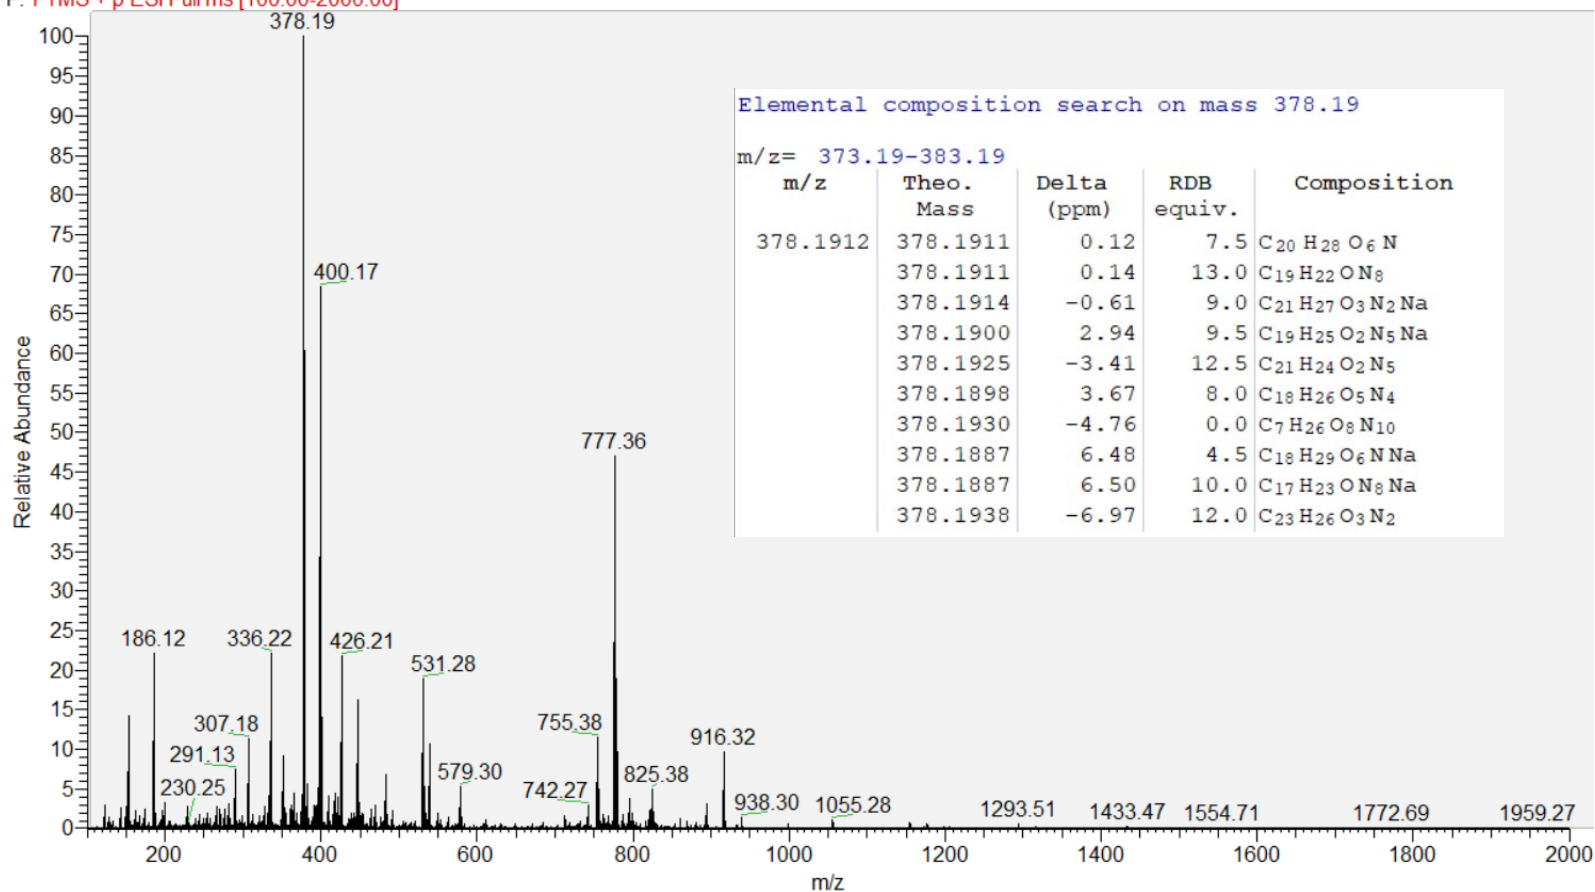

Figure S65. HR-ESI-MS spectrum of 7



CC-B-1-5-3-P1 + #8 RT: 0.09 AV: 1 NL: 2.49E4  
F: ITMS + c ESI d Full ms2 378.19@cid35.00 [90.00-390.00]

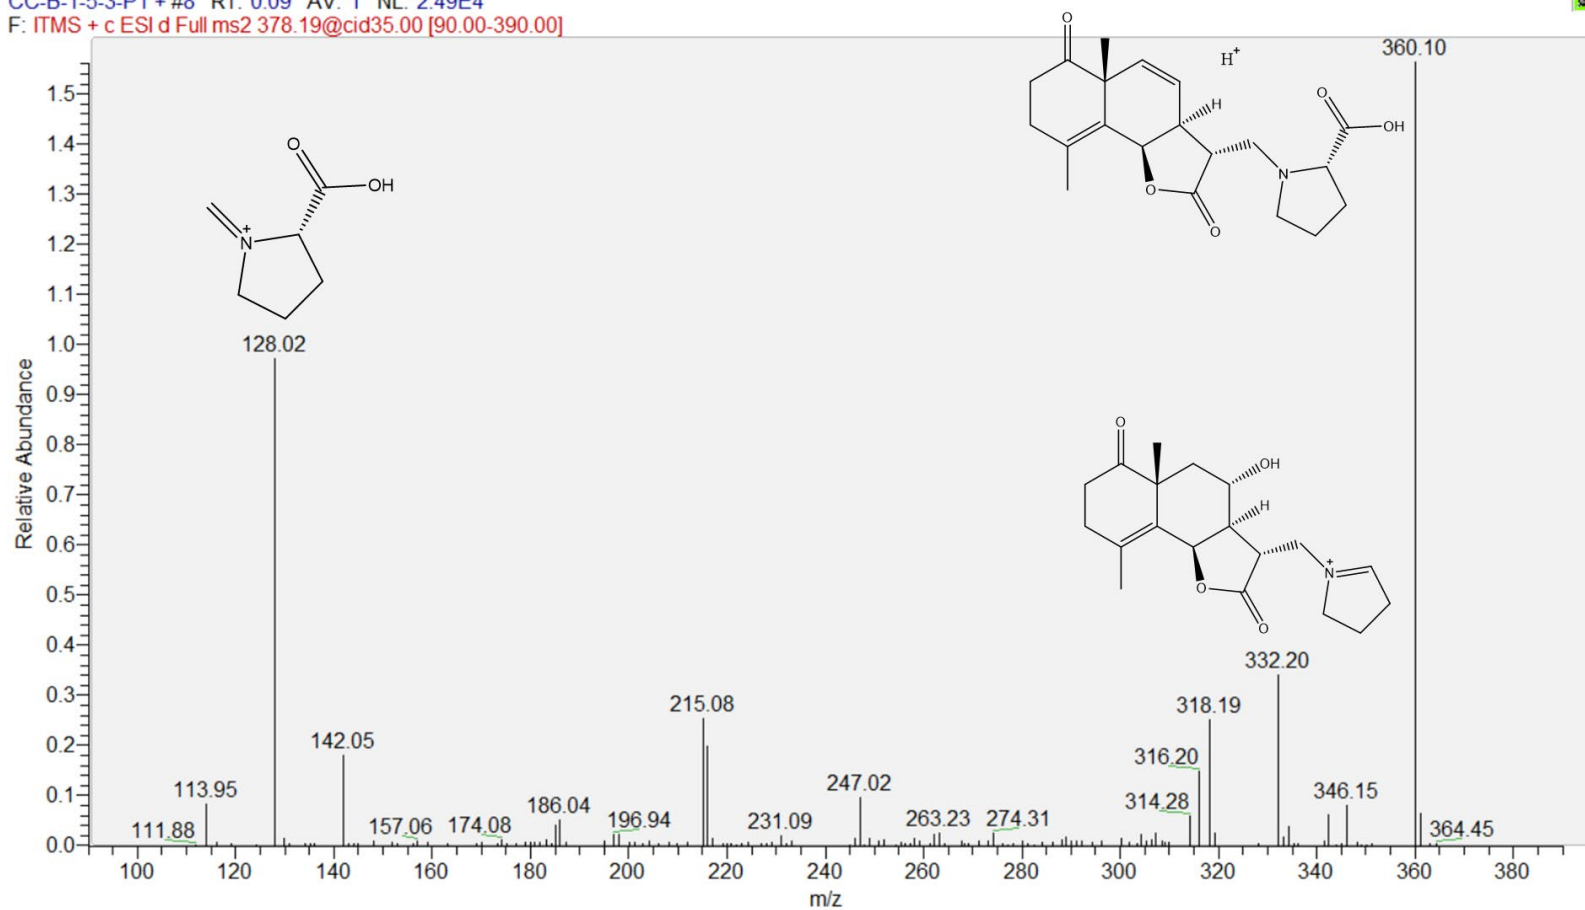

Figure S66. ESI-MS/MS spectrum of 7

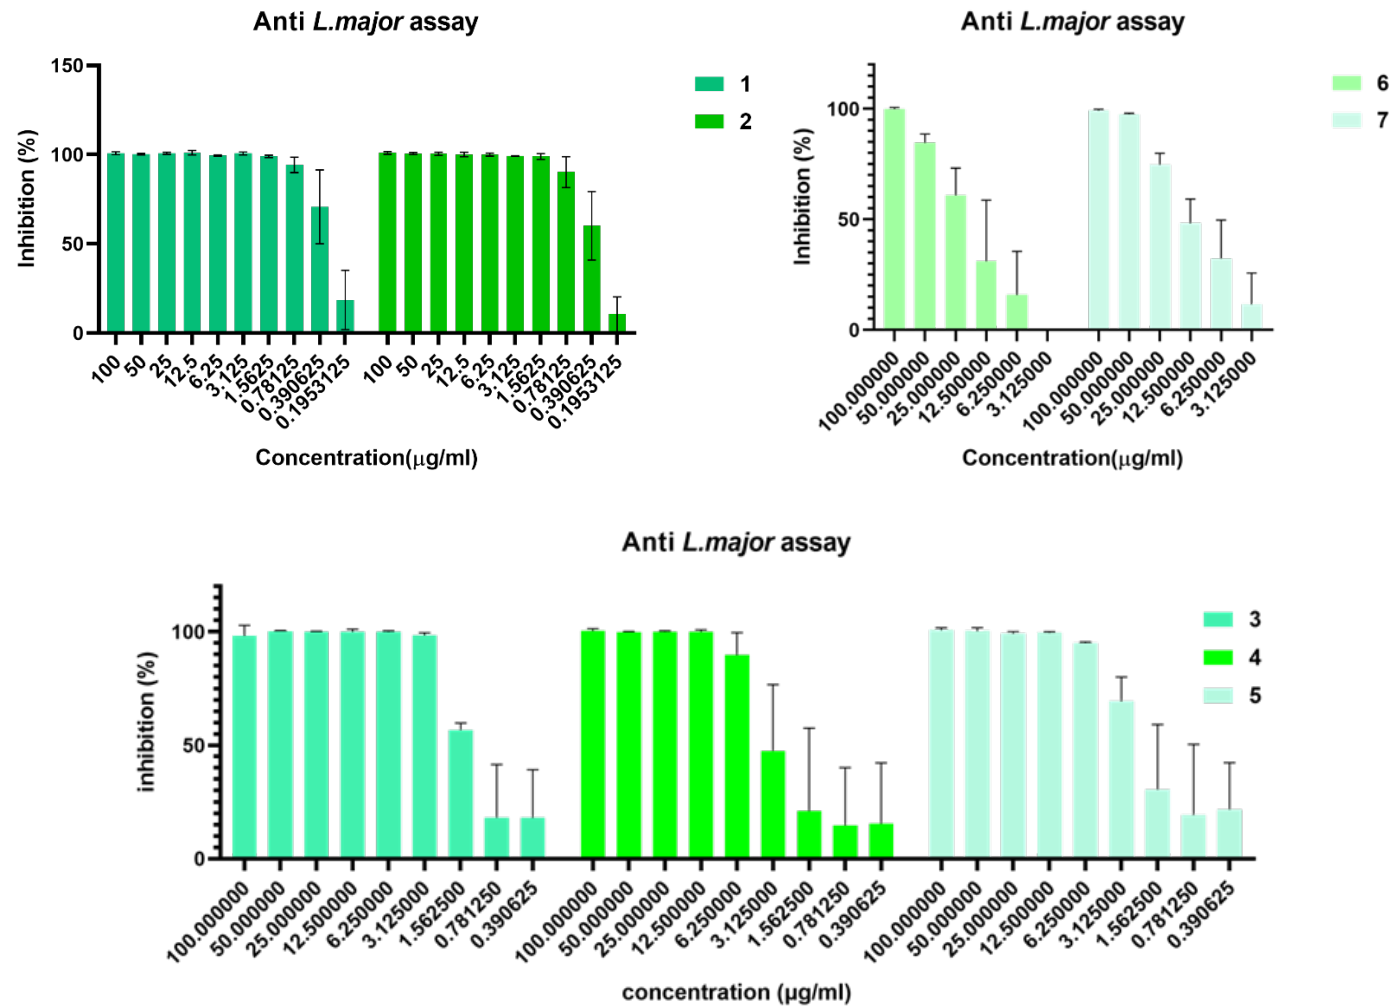

Figure S67. Anti-*L. major* data of 1-7

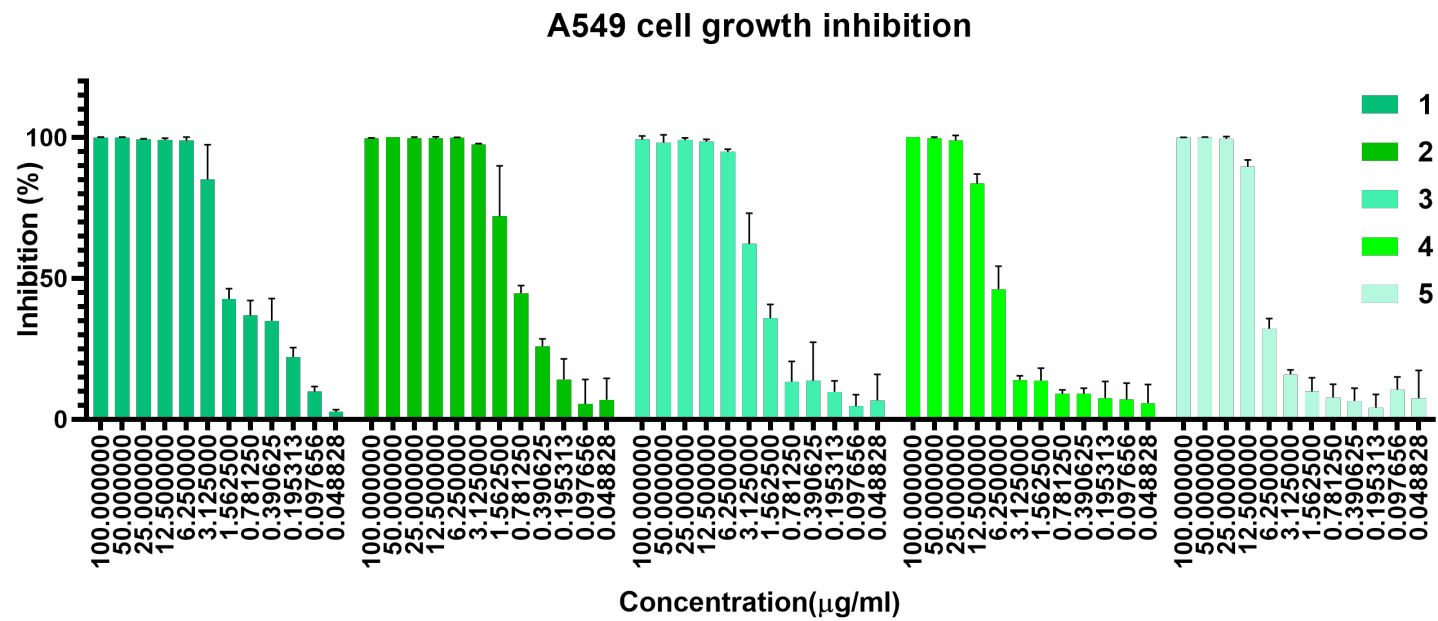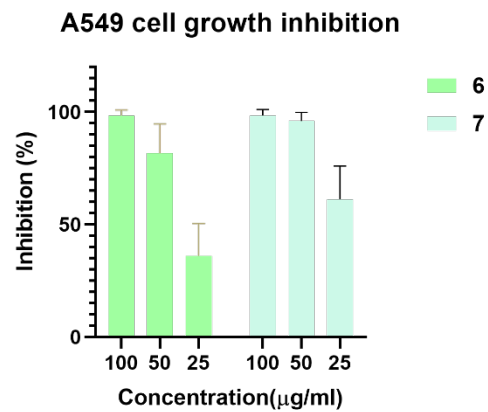

**Figure S68.** Anti-A549 data of 1-7

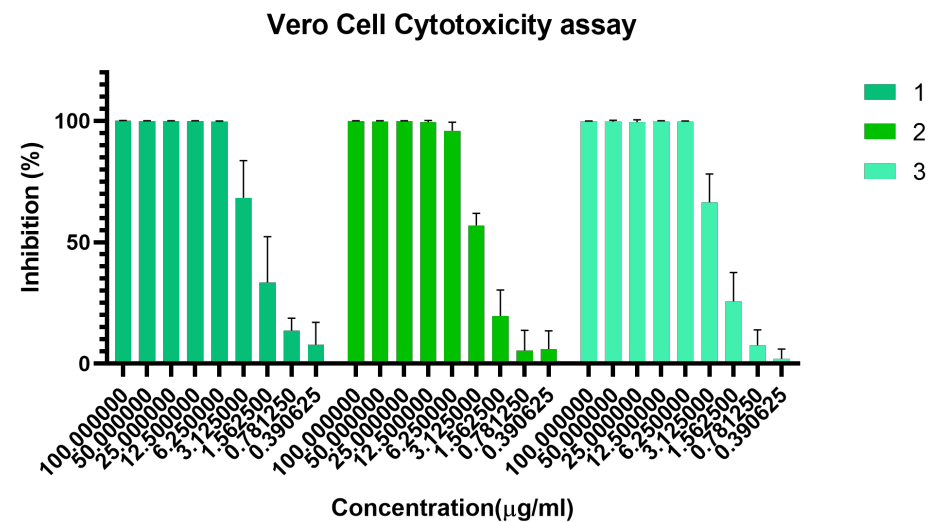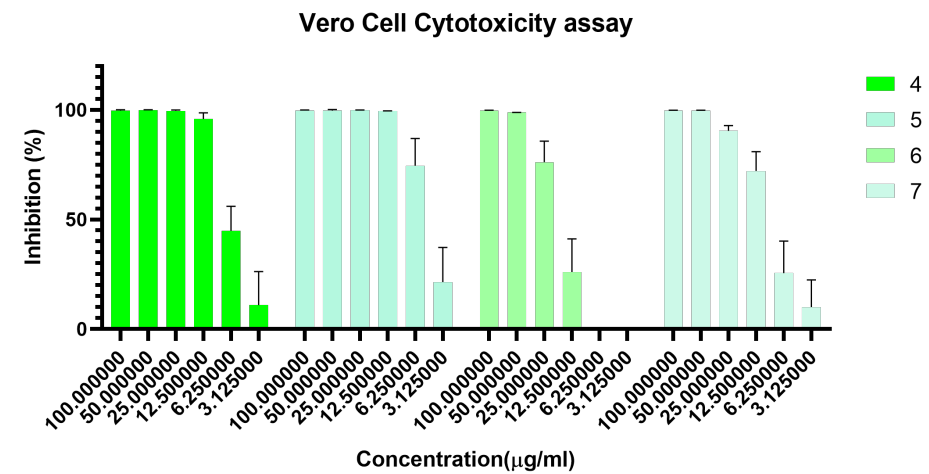

**Figure S69.** Vero cell cytotoxicity data of **1-7**
